# Supplementary material for: Enantioselective H-bond-directed vinylogous iminium ion strategy for the functionalization of vinyl-substituted heteroaryl aldehydes
Source: Royal Society of Chemistry journal article supplement (doi:10.1039/d0cc07765h), 2021-01-01
Supplement: d0cc07765h1.pdf [file d0cc07765h1.pdf]

## Enantioselective H-bond-directed vinylogous iminium ion strategy for the functionalization of vinyl-substituted heteroaryl aldehydes

Anna Skrzyńska,<sup>a</sup> Sebastian Frankowski,<sup>a</sup> Aleksandra Topolska,<sup>a</sup> Mateusz Dyguda,<sup>a</sup> Xin-Yue Gao,<sup>b</sup> Chang-Jiang Xu,<sup>b</sup> Ying-Chun Chen<sup>b</sup> and Łukasz Albrecht\*<sup>a</sup>

<sup>a</sup> Institute of Organic Chemistry, Faculty of Chemistry, Lodz University of Technology  
Zeromskiego 116, 90-924 Łódź, Poland

e-mail: lukasz.albrecht@p.lodz.pl

<http://www.a-teamlab.p.lodz.pl>

<sup>b</sup> Key Laboratory of Drug-Targeting and Drug Delivery System of the Ministry of Education and Sichuan Research Center for Drug Precision Industrial Technology, West China School of Pharmacy, Sichuan University, Chengdu 610041, China

### Contents

|                                                                                                                                                     |          |
|-----------------------------------------------------------------------------------------------------------------------------------------------------|----------|
| 1. General methods                                                                                                                                  | page S2  |
| 2. Organocatalytic synthesis of <b>6</b> – general procedure                                                                                        | page S3  |
| 3. Enantioselective synthesis of (3 <i>R</i> ,4 <i>R</i> )-4-(2-(hydroxymethyl)furan-3-yl)-3-phenyltetrahydrothiophen-3-ol <b>6a</b> on a 1 g scale | page S11 |
| 4. Synthesis of tricyclic furan derivatives <b>4</b> – general procedure                                                                            | page S12 |
| 5. Crystal and X-ray data                                                                                                                           | page S14 |
| 6. NMR data                                                                                                                                         | page S17 |
| 7. UPC <sup>2</sup> traces                                                                                                                          | page S35 |

## 1. General methods

NMR spectra were acquired on a Bruker Ultra Shield 700 instrument, running at 700 MHz for  $^1\text{H}$  and 176 MHz for  $^{13}\text{C}$ , respectively. Chemical shifts ( $\delta$ ) are reported in ppm relative to residual solvent signals ( $\text{CDCl}_3$ : 7.26 ppm for  $^1\text{H}$  NMR, 77.16 ppm for  $^{13}\text{C}$  NMR). Mass spectra were recorded on a Bruker Maxis Impact spectrometer using electrospray (ES+) ionization referenced to the mass of the charged species. Optical rotations were measured on a Perkin-Elmer 241 polarimeter and  $[\alpha]_{\text{D}}$  values are given in  $\text{deg}\cdot\text{cm}\cdot\text{g}^{-1}\cdot\text{dm}^{-1}$ ; concentration  $c$  is listed in  $\text{g}\cdot(100\text{ mL})^{-1}$ . Analytical thin layer chromatography (TLC) was performed using pre-coated aluminum-backed plates (Merck Kieselgel 60 F254) and visualized by ultraviolet irradiation or Hanessian's stain. The enantiomeric ratio (er) of the products was determined by chiral stationary phase UPC<sup>2</sup> or HPLC (Daicel Chiralpak IA and IG column). The racemic samples of products **6** for chiral UPC<sup>2</sup> separation studies were prepared using equimolar mixture of (*S*) and (*R*)-diphenyl-2-pyrrolidinemethanol trimethylsilyl ether as catalyst. Unless otherwise noted, analytical grade solvents and commercially available reagents were used without further purification. For flash chromatography (FC) silica gel (60, 35-70  $\mu\text{m}$ , Merck KGaA). Vinyl-substituted heteroaromatic aldehydes **1** and  $\alpha$ -mercaptocarbonyl compounds **2** were obtained using literature procedures.<sup>1,2</sup>

---

1. A. Przydacz, R. Kowalczyk and Ł. Albrecht, *Org. Biomol. Chem.*, 2017, **15**, 9566–9569.

2. X.-Y. Gao, R.-J. Yan, B.-X. Xiao, Ł. Albrecht and Y.-C. Chen, *Org. Lett.*, 2019, **21**, 9628–9632.

## 2. Organocatalytic synthesis of **6** – general procedure

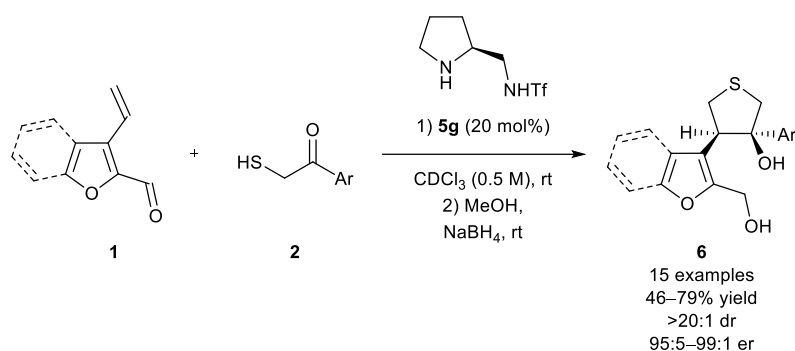

In an ordinary 4 mL glass vial, equipped with a Teflon-coated magnetic stirring bar and a screw cap, aldehyde **1** (1.0 equiv., 0.1 mmol), catalyst **5g** (0.2 equiv., 0.02 mmol, 4.6 mg) and corresponding  $\alpha$ -mercaptocarbonyl compound **2** (1.2 equiv., 0.12 mmol) were dissolved in  $\text{CDCl}_3$  (0.2 mL). The reaction mixture was stirred at ambient temperature for 20 h. After full conversion of the starting material **1** (as confirmed by  $^1\text{H}$  NMR of a crude reaction mixture), MeOH (0.1 mL) and  $\text{NaBH}_4$  (4 equiv., 0.4 mmol, 15.2 mg) were added. After 30 min. the reaction mixture was directly subjected to flash chromatography on silica gel (eluent: hexanes/ethyl acetate 85:15 to 70:30) to obtain pure product **6**.

### (3*R*,4*R*)-4-(2-(Hydroxymethyl)furan-3-yl)-3-phenyltetrahydrothiophen-3-ol (**6a**)

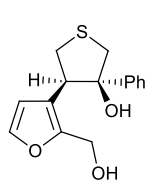

Following the general procedure product **6a** (>20:1 dr in a crude reaction mixture) was isolated in 75% yield as light-yellow oil. Catalyst **5g** (*S* configuration) was used in the reaction.  $^1\text{H}$  NMR (700MHz,  $\text{CDCl}_3$ )  $\delta$  7.42 – 7.40 (m, 2H), 7.36 – 7.33 (m, 2H), 7.28 – 7.26 (m, 2H), 6.45 (d,  $J = 1.9$  Hz, 1H), 4.18 (d,  $J = 13.5$  Hz, 1H), 4.10 (d,  $J = 13.5$  Hz, 1H), 3.66 (d,  $J = 12.0$  Hz, 1H), 3.55 (dd,  $J = 11.0, 7.4$  Hz, 1H), 3.34 (t,  $J = 10.9$  Hz, 1H), 3.20 (dd,  $J = 10.8, 7.4$  Hz, 1H), 3.13 (d,  $J = 12.0$  Hz, 1H), 2.58 (bs, 1H).  $^{13}\text{C}$  NMR (176 MHz,  $\text{CDCl}_3$ )  $\delta$  151.1, 142.3, 141.9, 128.6 (2C), 127.7, 125.2 (2C), 117.9, 111.5, 84.5, 55.4, 51.3, 45.4, 34.3. The er was determined by UPC<sup>2</sup> using a chiral Chiralpack IA column gradient from 100%  $\text{CO}_2$  up to 40%; *i*-PrOH, 2.5 mL/min;  $\tau_{\text{major}} = 3.92$  min,  $\tau_{\text{minor}} = 4.00$  min, (99:1 er).  $[\alpha]_{\text{D}}^{21} = 14.8$  ( $c = 1.0$ ,  $\text{CHCl}_3$ ). HRMS calculated for  $[\text{C}_{156}\text{H}_{18}\text{O}_3\text{S}+\text{Na}]$ : 299.0718; found: 299.0717.

**(3*S*,4*S*)-4-(2-(Hydroxymethyl)furan-3-yl)-3-(2-methoxyphenyl)tetrahydrothiophen-3-ol**  
**(6b)**

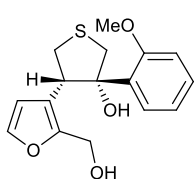

Following the general procedure product **6b** (>20:1 dr in a crude reaction mixture) was isolated in 79% yield as light-yellow oil. Catalyst *ent-5g* (*R* configuration) was used in the reaction. <sup>1</sup>H NMR (700MHz, CDCl<sub>3</sub>) δ 7.44 (dd, *J* = 7.7, 1.7 Hz, 1H), 7.27-7.25 (m, 2H), 6.95 – 6.90 (m, 2H), 6.49 (d, *J* = 1.9 Hz, 1H), 4.28 (d, *J* = 13.4 Hz, 1H), 4.18 (d, *J* = 13.4 Hz, 1H), 4.09 (dd, *J* = 10.8, 7.2 Hz, 1H), 3.91 (s, 3H), 3.87 (d, *J* = 11.5 Hz, 1H), 3.33 (t, *J* = 10.6 Hz, 2H), 3.33 (bs, 1H), 3.09 (dd, *J* = 10.4, 7.2 Hz, 1H), 3.01 (d, *J* = 11.5 Hz, 1H). <sup>13</sup>C NMR (176 MHz, CDCl<sub>3</sub>) δ 156.1, 151.2, 141.9, 129.6, 129.3, 127.9, 121.3, 118.9, 111.6, 111.3, 84.5, 55.5 (2C), 46.7, 42.4, 34.3. The er was determined by UPC<sup>2</sup> using a chiral Chiralpack IA column gradient from 100% CO<sub>2</sub> up to 40%; *i*-PrOH, 2.5 mL/min; τ<sub>major</sub> = 4.29 min, τ<sub>minor</sub> = 4.40 min, (98:2 er); [α]<sub>D</sub><sup>21</sup> = -57.3 (c = 1.0, CHCl<sub>3</sub>). HRMS calculated for [C<sub>16</sub>H<sub>18</sub>O<sub>4</sub>S+Na]: 329.0822; found: 313.0823.

**(3*S*,4*S*)-4-(2-(Hydroxymethyl)furan-3-yl)-3-(3-methoxyphenyl)tetrahydrothiophen-3-ol**  
**(6c)**

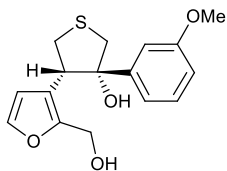

Following the general procedure product **6c** (>20:1 dr in a crude reaction mixture) was isolated in 64% yield as light-yellow oil. Catalyst *ent-5g* (*R* configuration) was used in the reaction. <sup>1</sup>H NMR (700MHz, CDCl<sub>3</sub>) δ 7.28 – 7.22 (m, 2H), 7.00 – 6.95 (m, 2H), 6.77 (dd, *J* = 8.3, 2.4 Hz, 1H), 6.43 (d, *J* = 1.9 Hz, 1H), 4.21 (d, *J* = 13.5 Hz, 1H), 4.15 (d, *J* = 13.5 Hz, 1H), 3.75 (s, 3H), 3.60 (d, *J* = 12 Hz, 1H), 3.55 (dd, *J* = 11.1, 7.4 Hz, 1H), 3.32 (t, *J* = 10.9 Hz, 1H), 3.10 (d, *J* = 12.0 Hz, 1H), 2.75 (bs, 1H). <sup>13</sup>C NMR (176 MHz, CDCl<sub>3</sub>) δ 159.9, 151.1, 144.1, 142.0, 129.5 (2C), 117.9, 117.1, 112.6, 111.9, 111.5, 84.5, 55.5, 55.4, 51.1, 45.5, 34.3. The er was determined by UPC<sup>2</sup> using a chiral Chiralpack IG column gradient from 100% CO<sub>2</sub> up to 40%; *i*-PrOH, 2.5 mL/min; τ<sub>major</sub> = 4.47 min, τ<sub>minor</sub> = 4.22 min, (99:1 er); [α]<sub>D</sub><sup>21</sup> = -23.1 (c = 1.0, CHCl<sub>3</sub>). HRMS calculated for [C<sub>16</sub>H<sub>18</sub>O<sub>4</sub>S+Na]: 329.0823; found: 313.0822.

**(3S,4S)-4-(2-(Hydroxymethyl)furan-3-yl)-3-(4-methoxyphenyl)tetrahydrothiophen-3-ol (6d)**

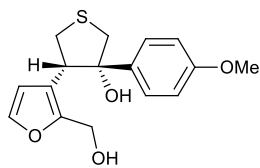

Following the general procedure product **6d** (>20:1 dr in a crude reaction mixture) was isolated in 64% yield as light-yellow oil. Catalyst *ent-5g* (*R* configuration) was used in the reaction. <sup>1</sup>H NMR (700 MHz, CDCl<sub>3</sub>) δ 7.33 – 7.30 (m, 2H), 7.28 (d, *J* = 1.9 Hz, 1H), 6.87 – 6.83 (m, 2H), 6.44 (d, *J* = 1.9 Hz, 1H), 4.23 – 4.15 (m, 2H), 3.77 (s, 3H), 3.59 (d, *J* = 12.0 Hz, 1H), 3.51 (dd, *J* = 10.9, 7.4 Hz, 1H), 3.31 (t, *J* = 10.8 Hz, 1H), 3.18 (dd, *J* = 10.7, 7.4 Hz, 1H), 3.08 (d, *J* = 12.0 Hz, 1H), 2.60 (s, 1H). <sup>13</sup>C NMR (176 MHz, CDCl<sub>3</sub>) δ 159.0, 151.2, 142.0, 134.1, 126.4 (2C), 118.1, 113.9 (2C), 111.6, 84.4, 55.6, 55.4, 50.9, 45.4, 34.2. The er was determined by UPC<sup>2</sup> using a chiral Chiralpack IG column gradient from 100% CO<sub>2</sub> up to 40%; *i*-PrOH, 2.5 mL/min; τ<sub>major</sub> = 4.49 min, τ<sub>minor</sub> = 4.33 min, (98:2 er); [α]<sub>D</sub><sup>21</sup> = -48.0 (c = 1.0, CHCl<sub>3</sub>). HRMS calculated for [C<sub>16</sub>H<sub>18</sub>O<sub>4</sub>S+Na]: 329.0823; found: 313.0822.

**(3S,4S)-4-(2-(Hydroxymethyl)furan-3-yl)-3-(*p*-tolyl)tetrahydrothiophen-3-ol (6e)**

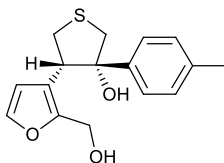

Following the general procedure product **6e** (>20:1 dr in a crude reaction mixture) was isolated in 68% yield as light-yellow oil. Catalyst *ent-5g* (*R* configuration) was used in the reaction. <sup>1</sup>H NMR (700 MHz, CDCl<sub>3</sub>) δ 7.29 (d, *J* = 1.9 Hz, 1H), 7.29 – 7.27 (m, 2H), 7.16 – 7.13 (m, 2H), 6.44 (d, *J* = 1.9 Hz, 1H), 4.18 (d, *J* = 13.5 Hz, 1H), 4.11 (d, *J* = 13.5 Hz, 1H), 3.62 (d, *J* = 12.0 Hz, 1H), 3.52 (dd, *J* = 11.0, 7.4 Hz, 1H), 3.33 (t, *J* = 10.9 Hz, 1H), 3.17 (dd, *J* = 10.7, 7.4 Hz, 1H), 3.09 (d, *J* = 12.0 Hz, 1H), 2.62 (s, 1H), 2.30 (s, 3H). <sup>13</sup>C NMR (176 MHz, CDCl<sub>3</sub>) δ 151.1, 142.0, 139.3, 137.5, 129.3 (2C), 125.1 (2C), 118.0, 111.5, 84.6, 55.4, 51.2, 45.5, 34.3, 21.0. The er was determined by UPC<sup>2</sup> using a chiral Chiralpack IG column gradient from 100% CO<sub>2</sub> up to 40%; *i*-PrOH, 2.5 mL/min; flow rate 1.0 mL/min; τ<sub>major</sub> = 4.45 min, τ<sub>minor</sub> = 4.18 min, (98:2 er); [α]<sub>D</sub><sup>21</sup> = -18.5 (c = 1.0, CHCl<sub>3</sub>). HRMS calculated for [C<sub>16</sub>H<sub>18</sub>O<sub>3</sub>S+Na]: 313.0874; found: 313.0877.

**(3S,4S)-3-(2-Fluorophenyl)-4-(2-(hydroxymethyl)furan-3-yl)tetrahydrothiophen-3-ol (6f)**

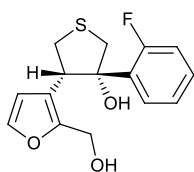

Following the general procedure product **6f** (>20:1 dr in a crude reaction mixture) was isolated in 61% yield as light-yellow oil. Catalyst *ent-5g* (*R* configuration) was used in the reaction. <sup>1</sup>H NMR (700MHz, CDCl<sub>3</sub>) δ 7.50 (td, *J* = 8.2, 1.9 Hz, 1H), 7.29 – 7.21 (m, 2H), 7.11 – 7.05 (m, 2H), 6.41 (d, *J*

= 1.9 Hz, 1H), 4.33 (d,  $J = 13.4$  Hz, 1H), 4.23 (d,  $J = 13.4$  Hz, 1H), 3.96 (dd,  $J = 11.0, 7.5$  Hz, 1H), 3.82 (d,  $J = 11.7$  Hz, 1H), 3.33 (td,  $J = 10.8, 1.0$  Hz, 1H), 3.17 (dd,  $J = 10.6, 7.4$  Hz, 1H), 2.99 (dd,  $J = 11.8, 1.6$  Hz, 1H), 2.88 (s, 1H).  $^{13}\text{C}$  NMR (176 MHz,  $\text{CDCl}_3$ )  $\delta$  159.2 (d,  $J = 245.2$  Hz), 151.2, 142.0, 129.8 (d,  $J = 8.5$  Hz), 128.9 (d,  $J = 3.8$  Hz), 124.6 (d,  $J = 3.4$  Hz), 118.0, 116.2, 116.1, 111.6, 83.2 (d,  $J = 5.3$  Hz), 55.4, 47.7 (d,  $J = 5.2$  Hz), 43.2 (d,  $J = 5.2$  Hz), 33.9. The er was determined by UPC<sup>2</sup> using a chiral Chiralpack IA column gradient from 100%  $\text{CO}_2$  up to 40%; *i*-PrOH, 2.5 mL/min;  $\tau_{\text{major}} = 3.73$  min,  $\tau_{\text{minor}} = 3.64$  min, (96:4 er);  $[\alpha]_{\text{D}}^{21} = -27.5$  ( $c = 1.0, \text{CHCl}_3$ ). HRMS calculated for  $[\text{C}_{15}\text{H}_{15}\text{O}_3\text{SF}+\text{Na}]$ : 317.0624; found: 317.0622.

**(3*R*,4*R*)-3-(3-Fluorophenyl)-4-(2-(hydroxymethyl)furan-3-yl)tetrahydrothiophen-3-ol**

**(6g)**

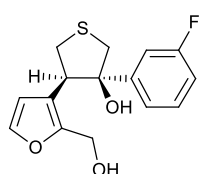

Following the general procedure product **6g** (>20:1 dr in a crude reaction mixture) was isolated in 61% yield as light-yellow oil. Catalyst **5g** (*S* configuration) was used in the reaction.  $^1\text{H}$  NMR (700MHz,  $\text{CDCl}_3$ )  $\delta$  7.30 (td,  $J = 8.0, 5.9$  Hz, 1H), 7.26 (d,  $J = 2.0$  Hz, 1H), 7.19 – 7.12 (m, 2H), 6.94 (tdd,  $J = 8.0, 2.6, 1.0$  Hz, 1H), 6.42 (d,  $J = 2.0$  Hz, 1H), 4.26 (d,  $J = 13.4$  Hz, 1H), 4.22 (d,  $J = 13.4$  Hz, 1H), 3.56 (d,  $J = 12.0$  Hz, 1H), 3.56 (dd,  $J = 10.7, 7.5$  Hz, 1H), 3.30 (dd,  $J = 10.8, 10.7$  Hz, 1H), 3.20 (dd,  $J = 10.7, 7.5$  Hz, 1H), 3.10 (d,  $J = 12.0$  Hz, 1H), 2.78 (bs, 1H).  $^{13}\text{C}$  NMR (176 MHz,  $\text{CDCl}_3$ )  $\delta$  163.5 (d,  $J = 246.7$  Hz), 151.1, 145.1 (d,  $J = 6.9$  Hz), 142.1, 130.0 (d,  $J = 8.2$  Hz), 120.6 (d,  $J = 3.0$  Hz), 117.7, 114.6 (d,  $J = 21.0$  Hz), 113.0 (d,  $J = 22.9$  Hz), 111.6, 84.1, 55.6, 50.9, 45.6, 34.2. The er was determined by UPC<sup>2</sup> using a chiral Chiralpack IA column gradient from 100%  $\text{CO}_2$  up to 40%; *i*-PrOH, 2.5 mL/min;  $\tau_{\text{major}} = 3.72$  min,  $\tau_{\text{minor}} = 3.89$  min, (95:5 er);  $[\alpha]_{\text{D}}^{21} = +30.5$  ( $c = 1.0, \text{CHCl}_3$ ). HRMS calculated for  $[\text{C}_{15}\text{H}_{15}\text{O}_3\text{SF}+\text{Na}]$ : 317.0624; found: 317.0624.

**(3*S*,4*S*)-3-(4-Fluorophenyl)-4-(2-(hydroxymethyl)furan-3-yl)tetrahydrothiophen-3-ol**

**(6h)**

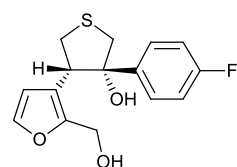

Following the general procedure product **6h** (>20:1 dr in a crude reaction mixture) was isolated in 60% yield as light-yellow oil. Catalyst *ent*-**5g** (*R* configuration) was used in the reaction.  $^1\text{H}$  NMR (700MHz,  $\text{CDCl}_3$ )  $\delta$  7.41 – 7.36 (m, 2H), 7.27 – 7.24 (m, 1H), 7.07 – 6.97 (m, 2H), 6.41 (d,  $J = 1.9$  Hz, 1H), 4.24 (d,  $J = 13.5$  Hz, 1H), 4.21 (d,  $J = 13.5$  Hz, 1H), 3.56 (d,  $J = 12.0$  Hz, 1H), 3.53 (dd,  $J = 10.8, 7.5$  Hz, 1H), 3.29 (t,  $J = 10.7$  Hz, 1H), 3.19 (dd,  $J = 10.8, 7.5$  Hz, 1H), 3.07 (d,  $J$

= 12.0 Hz, 1H), 2.85 (bs, 1H).  $^{13}\text{C}$  NMR (176 MHz,  $\text{CDCl}_3$ )  $\delta$  162.0 (d,  $J = 247.1$  Hz), 151.0, 141.8, 137.7 (d,  $J = 3.1$  Hz), 126.9 (d,  $J = 7.9$  Hz, 2C), 117.8, 115.3 (d,  $J = 21.2$  Hz), 111.6, 84.0, 55.5, 50.6, 45.4, 34.0. The er was determined by UPC<sup>2</sup> using a chiral Chiralpack IG column gradient from 100%  $\text{CO}_2$  up to 40%; *i*-PrOH, 2.5 mL/min;  $\tau_{\text{major}} = 3.95$  min,  $\tau_{\text{minor}} = 3.71$  min, (96:4 er);  $[\alpha]_{\text{D}}^{21} = -16.1$  ( $c = 1.0$ ,  $\text{CHCl}_3$ ). HRMS calculated for  $[\text{C}_{15}\text{H}_{15}\text{O}_3\text{SF}+\text{Na}]$ : 317.0624; found: 317.0624.

**(3*S*,4*S*)-3-(4-Chlorophenyl)-4-(2-(hydroxymethyl)furan-3-yl)tetrahydrothiophen-3-ol (6i)**

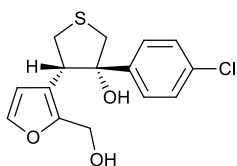

Following the general procedure product **6i** (>20:1 dr in a crude reaction mixture) was isolated in 60% yield as light-yellow oil. Catalyst *ent*-**5g** (*R* configuration) was used in the reaction.  $^1\text{H}$  NMR (700MHz,  $\text{CDCl}_3$ )  $\delta$  7.37 – 7.33 (m, 2H), 7.30 – 7.27 (m, 2H), 7.25 (dd,  $J = 1.9, 0.5$  Hz, 1H), 6.41 (d,  $J = 1.9$  Hz, 1H), 4.26 (d,  $J = 13.4$  Hz, 1H), 4.22 (d,  $J = 13.4$  Hz, 1H), 3.54 (d,  $J = 11.0$  Hz, 1H), 3.53 (dd,  $J = 11.0, 7.7$  Hz, 1H), 3.28 (dd,  $J = 11.0, 10.7$  Hz, 1H), 3.19 (dd,  $J = 10.7, 7.7$  Hz, 1H), 3.07 (d,  $J = 11.0$  Hz, 1H), 2.88 (bs, 1H).  $^{13}\text{C}$  NMR (176 MHz,  $\text{CDCl}_3$ )  $\delta$  151.1, 142.0, 140.7, 133.6, 128.7 (2C), 126.8 (2C), 117.8, 111.7, 84.1, 55.7, 50.7, 45.5, 34.1. The er was determined by UPC<sup>2</sup> using a chiral Chiralpack IG column gradient from 100%  $\text{CO}_2$  up to 40%; *i*-PrOH, 2.5 mL/min;  $\tau_{\text{major}} = 4.37$  min,  $\tau_{\text{minor}} = 4.04$  min, (96:4 er);  $[\alpha]_{\text{D}}^{21} = -43.5$  ( $c = 1.0$ ,  $\text{CHCl}_3$ ). HRMS calculated for  $[\text{C}_{15}\text{H}_{15}\text{O}_3\text{SCl}+\text{Na}]$ : 333.0328; found: 333.0325.

**(3*R*,4*R*)-4-(2-(Hydroxymethyl)furan-3-yl)-3-(4-(trifluoromethyl)phenyl)tetrahydrothiophen-3-ol (6j)**

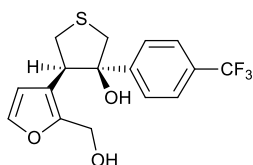

Following the general procedure product **6j** (>20:1 dr in a crude reaction mixture) was isolated in 50% yield as light-yellow oil. Catalyst **5g** (*S* configuration) was used in the reaction.  $^1\text{H}$  NMR (700 MHz,  $\text{CDCl}_3$ )  $\delta$  7.59 – 7.55 (m, 4H), 7.25 (d,  $J = 1.9$  Hz, 1H), 6.42 (d,  $J = 1.9$  Hz, 1H), 4.28 – 4.21 (m, 2H), 3.62 (dd,  $J = 10.8, 7.5$  Hz, 1H), 3.57 (d,  $J = 12.0$  Hz, 1H), 3.30 (t,  $J = 10.8$  Hz, 1H), 3.23 (dd,  $J = 10.8, 7.6$  Hz, 1H), 3.10 (d,  $J = 12.0$  Hz, 1H), 2.87 (bs, 1H).  $^{13}\text{C}$  NMR (176 MHz,  $\text{CDCl}_3$ )  $\delta$  151.1, 146.2, 142.0, 129.9 (q,  $J = 32.6$  Hz), 125.8 (2C), 125.5 (q,  $J = 3.8$  Hz, 2C), 124.1 (q,  $J = 272.7$  Hz), 117.7, 111.7, 84.2, 55.7, 50.7, 45.7, 34.2. The er was determined by UPC<sup>2</sup> using a chiral Chiralpack IG column gradient from 100%  $\text{CO}_2$  up to 40%;

*i*-PrOH, 2.5 mL/min;  $\tau_{\text{major}} = 3.13$  min,  $\tau_{\text{minor}} = 3.45$  min, (97:3 er);  $[\alpha]_{\text{D}}^{21} = -29.1$  ( $c = 1.0$ ,  $\text{CHCl}_3$ ). HRMS calculated for  $[\text{C}_{16}\text{H}_{15}\text{O}_3\text{SF}_3+\text{Na}]$ : 367.0592; found: 367.0593.

**(3*R*,4*R*)-4-(2-(Hydroxymethyl)furan-3-yl)-3-(naphthalen-2-yl)tetrahydrothiophen-3-ol**  
**(6k)**

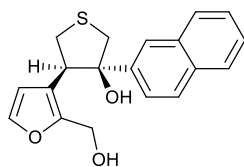

Following the general procedure product **6k** (>20:1 dr in a crude reaction mixture) was isolated in 55% yield as light-yellow oil. Catalyst **5g** (*S* configuration) was used in the reaction.  $^1\text{H}$  NMR (700 MHz,  $\text{CDCl}_3$ )  $\delta$  7.91 (d,  $J = 1.9$  Hz, 1H), 7.83 (d,  $J = 8.6$  Hz, 1H), 7.81 – 7.77 (m, 2H), 7.51 (dd,  $J = 8.6, 1.9$  Hz, 1H), 7.49 – 7.45 (m, 2H), 7.23 (d,  $J = 1.9$  Hz, 1H), 6.46 (d,  $J = 1.9$  Hz, 1H), 4.20 (d,  $J = 13.4$  Hz, 1H), 4.12 (d,  $J = 13.4$  Hz, 1H), 3.74 (dd,  $J = 10.8, 7.4$  Hz, 1H), 3.69 (d,  $J = 12.0$  Hz, 1H), 3.38 (t,  $J = 10.8$  Hz, 1H), 3.23 (dd,  $J = 10.8, 7.4$  Hz, 1H), 3.16 (d,  $J = 12.0$  Hz, 1H), 2.87 (bs, 1H).  $^{13}\text{C}$  NMR (176 MHz,  $\text{CDCl}_3$ )  $\delta$  151.1, 142.0, 139.4, 133.1, 132.5, 128.3 (2C), 127.6, 126.7, 126.5, 124.6, 122.9, 117.9, 111.6, 84.7, 55.5, 50.7, 45.8, 34.4. The er was determined by UPC<sup>2</sup> using a chiral Chiralpack IB. column gradient from 100%  $\text{CO}_2$  up to 40%; *i*-PrOH, 2.5 mL/min;  $\tau_{\text{major}} = 4.63$  min,  $\tau_{\text{minor}} = 4.84$  min, (96:4 er);  $[\alpha]_{\text{D}}^{21} = -44.1$  ( $c = 1.0$ ,  $\text{CHCl}_3$ ). HRMS calculated for  $[\text{C}_{19}\text{H}_{18}\text{O}_3\text{S}+\text{Na}]$ : 349.0874; found: 349.0877.

**(3*S*,4*S*)-3-(3,4-Dichlorophenyl)-4-(2-(hydroxymethyl)furan-3-yl)tetrahydrothiophen-3-ol**  
**(6l)**

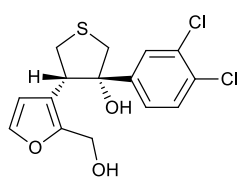

Following the general procedure product **6l** (>20:1 dr in a crude reaction mixture) was isolated in 58% yield as light-yellow oil. Catalyst *ent*-**5g** (*R* configuration) was used in the reaction.  $^1\text{H}$  NMR (700MHz,  $\text{CDCl}_3$ )  $\delta$  7.58 (d,  $J = 2.2$  Hz, 1H), 7.40 (d,  $J = 8.4$  Hz, 1H), 7.29 – 7.27 (m, 2H), 6.43 (d,  $J = 1.9$  Hz, 1H), 4.35 (d,  $J = 0.8$  Hz, 2H), 3.60 (dd,  $J = 10.7, 7.5$  Hz, 1H), 3.49 (d,  $J = 11.9$  Hz, 1H), 3.29 (t,  $J = 10.7$  Hz, 1H), 3.22 (dd,  $J = 10.8, 7.6$  Hz, 1H), 3.08 (d,  $J = 12.0$  Hz, 1H).  $^{13}\text{C}$  NMR (176 MHz,  $\text{CDCl}_3$ )  $\delta$  151.1, 142.5, 142.0, 132.8, 131.7, 130.4, 127.8, 124.7, 117.7, 111.7, 83.6, 55.8, 50.3, 45.7, 34.0. The er was determined by UPC<sup>2</sup> using a chiral Chiralpack IG column gradient from 100%  $\text{CO}_2$  up to 40%; *i*-PrOH, 2.5 mL/min;  $\tau_{\text{major}} = 4.30$  min,  $\tau_{\text{minor}} = 3.95$  min, (96:4 er);  $[\alpha]_{\text{D}}^{21} = -35.8$  ( $c = 1.0$ ,  $\text{CHCl}_3$ ). HRMS calculated for  $[\text{C}_{14}\text{H}_{15}\text{O}_3\text{SCl}_2+\text{Na}]$ : 366.9938; found: 366.9931.



**(3R,4R)-4-(2-(Hydroxymethyl)furan-3-yl)-3-(thiophen-3-yl)tetrahydrothiophen-3-ol (6m)**

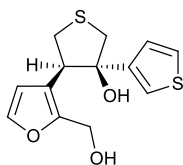

Following the general procedure product **6m** (>20:1 dr in a crude reaction mixture) was isolated in 52% yield as light-yellow oil. Catalyst **5g** (*S* configuration) was used in the reaction.  $^1\text{H NMR}$  (700 MHz,  $\text{CDCl}_3$ )  $\delta$  7.34 – 7.30 (m, 2H), 7.17 (dd,  $J = 3.1, 1.4$  Hz, 1H), 7.01 (dd,  $J = 5.0, 1.4$  Hz, 1H), 6.46 (d,  $J = 1.9$  Hz, 1H), 4.29 – 4.17 (m, 2H), 3.57 (d,  $J = 11.8$  Hz, 1H), 3.47 (dd,  $J = 10.8, 7.4$  Hz, 1H), 3.30 (t,  $J = 10.7$  Hz, 1H), 3.16 (dd,  $J = 10.7, 7.4$  Hz, 1H), 3.12 (d,  $J = 11.9$  Hz, 1H), 2.68 (bs, 1H), 1.26 (s, 1H).  $^{13}\text{C NMR}$  (176 MHz,  $\text{CDCl}_3$ )  $\delta$  151.2, 144.3, 142.0, 126.6, 125.1, 121.7, 118.0, 111.5, 83.5, 55.5, 50.6, 44.8, 34.0. The er was determined by UPC<sup>2</sup> using a chiral Chiralpack IA column gradient from 100%  $\text{CO}_2$  up to 40%; MeOH, 2.5 mL/min;  $\tau_{\text{major}} = 3.88$  min,  $\tau_{\text{minor}} = 4.10$  min, (98:2 er);  $[\alpha]_{\text{D}}^{21} = +14.1$  ( $c = 1.0, \text{CHCl}_3$ ). HRMS calculated for  $[\text{C}_{13}\text{H}_{14}\text{O}_3\text{S}+\text{Na}]$ : 349.0874; found: 349.0877.

**(3S,4S)-4-(2-(Hydroxymethyl)thiophen-3-yl)-3-phenyltetrahydrothiophen-3-ol (6n)**

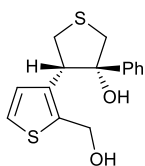

Following the general procedure product **6n** (>20:1 dr in a crude reaction mixture) was isolated in 46% yield as light-yellow solid. The reaction was carried out at 40 °C. Catalyst *ent*-**5g** (*R* configuration) was used in the reaction.  $^1\text{H NMR}$  (700 MHz,  $\text{CDCl}_3$ )  $\delta$  7.42 – 7.39 (m, 2H), 7.31 (m, 2H), 7.29 (d,  $J = 5.3$  Hz, 1H), 7.27 – 7.23 (m, 1H), 7.20 (d,  $J = 5.3$  Hz, 1H), 4.33 (d,  $J = 13.2$  Hz, 1H), 4.23 (d,  $J = 13.2$  Hz, 1H), 3.78 – 3.71 (m, 2H), 3.36 (t,  $J = 10.7$  Hz, 1H), 3.21 (dd,  $J = 10.7, 7.4$  Hz, 1H), 3.13 (d,  $J = 11.9$  Hz, 1H), 2.66 (bs, 1H).  $^{13}\text{C NMR}$  (176 MHz,  $\text{CDCl}_3$ )  $\delta$  142.3, 140.3, 134.4, 128.6 (2C), 128.5, 127.8, 125.2 (2C), 124.4, 84.52, 57.4, 53.5, 45.0, 34.8. The er was determined by UPC<sup>2</sup> using a chiral Chiralpack IG column gradient from 100%  $\text{CO}_2$  up to 40%; *i*-PrOH, 2.5 mL/min;  $\tau_{\text{major}} = 4.47$  min,  $\tau_{\text{minor}} = 4.66$  min, (98:2 er);  $[\alpha]_{\text{D}}^{23} = +12.9$  ( $c = 1.0, \text{CHCl}_3$ ). HRMS calculated for  $[\text{C}_{15}\text{H}_{16}\text{O}_3\text{S}_2+\text{Na}]$ : 315.0489; found: 315.0491.

**(3R,4R)-4-(2-(hydroxymethyl)benzofuran-3-yl)-3-phenyltetrahydrothiophen-3-ol (6o)**

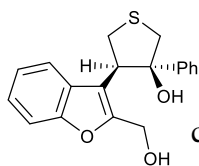

Following the general procedure product **6o** (>20:1 dr in a crude reaction mixture) was isolated in 55% yield as light-yellow solid/oil. Catalyst **5g** (*S* configuration) was used in the reaction.  $^1\text{H NMR}$  (400 MHz,  $\text{CDCl}_3$ )  $\delta$  7.72 (dd,  $J = 7.8, 1.6$  Hz, 1H), 7.41–7.34 (m, 3H), 7.31–7.15 (m, 5H), 4.42 (d,  $J = 13.6$  Hz, 1H), 4.30 (d,  $J = 13.6$  Hz, 1H), 3.88–3.75 (m, 3H), 3.31–3.21 (m, 1H), 3.19 (d,  $J = 12.2$  Hz, 1H).  $^{13}\text{C NMR}$  (100 MHz,  $\text{CDCl}_3$ )  $\delta$  154.2, 153.6, 141.9, 128.5, 128.4, 127.7, 125.1, 124.6, 122.48, 121.8,

112.5, 111.4, 85.3, 56.3, 52.2, 45.6, 32.8. The er was determined by HPLC analysis using a chiral Daicel Chiralpack IC column gradient from 100% CO<sub>2</sub> up to 40%; *i*-PrOH, 1.0 mL/min;  $\tau_{\text{major}} = 6.71 \text{ min}$ ,  $\tau_{\text{minor}} = 7.53 \text{ min}$ , (95:5 er);  $[\alpha]_{\text{D}}^{25} = -44$  (c = 0.5, CHCl<sub>3</sub>). HRMS calculated for [C<sub>15</sub>H<sub>16</sub>O<sub>3</sub>S<sub>2</sub>+Na]: 349.0869; found: 349.0868.

### 3. Enantioselective synthesis of (3*R*,4*R*)-4-(2-(hydroxymethyl)furan-3-yl)-3-phenyltetrahydrothiophen-3-ol **6a** on a 1 g scale

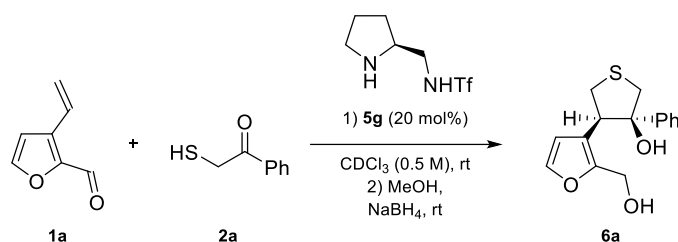

In an ordinary 4 mL glass vial, equipped with a Teflon-coated magnetic stirring bar and a screw cap, aldehyde **1a** (1.0 equiv., 8.19 mmol), catalyst **5g** (0.2 equiv., 1.64 mmol) and  $\alpha$ -mercaptoacetophenone **2a** (1.2 equiv., 9.83 mmol) were dissolved in CDCl<sub>3</sub> (16.4 mL). The reaction mixture was stirred at ambient temperature for 20 h. After full conversion of the starting material **1a** (as confirmed by <sup>1</sup>H NMR of a crude reaction mixture), MeOH (8.2 mL) and NaBH<sub>4</sub> (4 equiv., 32.76 mmol) were added. After 30 min. the reaction mixture was directly subjected to flash chromatography on silica gel (eluent: hexane/ethyl acetate 85:15 to 70:30) to obtain pure product **6a** in 69% yield as light-yellow oil.

#### 4. Synthesis of tricyclic furan derivatives **4** – general procedure

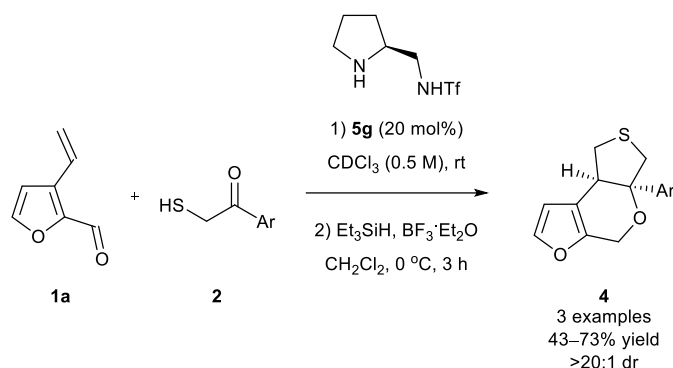

In an ordinary 4 mL glass vial, equipped with a Teflon-coated magnetic stirring bar and a screw cap, aldehyde **1** (1.0 equiv., 0.1 mmol), catalyst **5g** (0.2 equiv., 0.02 mmol, 4.6 mg) and corresponding  $\alpha$ -mercaptocarbonyl compound **2** (1.2 equiv., 0.12 mmol) were dissolved in CDCl<sub>3</sub> (0.2 mL). The reaction mixture was stirred at ambient temperature for 20 h. After full conversion of the starting material **1** (as confirmed by <sup>1</sup>H NMR of a crude reaction mixture), the crude product was diluted with CH<sub>2</sub>Cl<sub>2</sub> (1 mL), then Et<sub>3</sub>SiH (3.0 equiv, 0.3 mmol) and BF<sub>3</sub>·Et<sub>2</sub>O (3.3 equiv., 0.33 mmol) were added in that order at 0 °C. The mixture was stirred for 3 h and directly subjected to flash chromatography on silica gel (eluent: hexane/diethyl ether 80:20) to obtain pure product **4**.

#### (3*aR*,8*bR*)-3*a*-Phenyl-3,3*a*,5,8*b*-tetrahydro-1*H*-furo[3,2-*d*]thieno[3,4-*b*]pyran (**4a**)

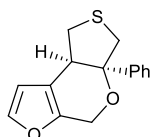

Following the general procedure product **4a** (>20:1 dr in a crude reaction mixture) was isolated in 73% yield as light yellow oil. <sup>1</sup>H NMR (700 MHz, CDCl<sub>3</sub>)  $\delta$  7.39 – 7.37 (m, 2H), 7.32 – 7.29 (m, 2H), 7.28 – 7.26 (m, 1H), 7.26 – 7.24 (m, 1H), 6.37 (d, *J* = 1.9 Hz, 1H), 4.64 (d, *J* = 15.0 Hz, 1H), 4.19 (ddd, *J* = 15.0, 1.2 Hz, 1H), 3.81 (ddd, *J* = 10.5, 7.2, 1.2 Hz, 1H), 3.43 (d, *J* = 12.3 Hz, 1H), 3.30 (dd, *J* = 10.5, 7.2 Hz, 1H), 3.14 (d, *J* = 12.3 Hz, 1H), 3.08 (t, *J* = 10.5 Hz, 1H). <sup>13</sup>C NMR (176 MHz, CDCl<sub>3</sub>)  $\delta$  146.6, 141.8, 139.4, 128.6 (2C), 128.1, 126.5 (2C), 116.8, 109.4, 87.7, 60.4, 43.7, 43.6, 36.7. HRMS calculated for [C<sub>15</sub>H<sub>14</sub>O<sub>2</sub>S+Na]: 258.0715; found: 257.0634.

**(3aR,8bR)-3a-(4-Fluorophenyl)-3,3a,5,8b-tetrahydro-1H-furo[3,2-d]thieno[3,4-b]pyran**

**(4b)**

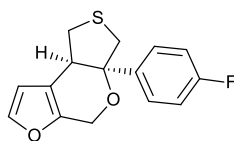

Following the general procedure product **4b** (>20:1 dr in a crude reaction mixture) was isolated in 51% yield as yellow oil.  $^1\text{H}$  NMR (700 MHz,  $\text{CDCl}_3$ )  $\delta$  7.38 – 7.32 (m, 2H), 7.27 – 7.24 (m, 1H), 7.02 – 6.96 (m, 2H), 6.37 (d,  $J = 1.9$  Hz, 1H), 4.64 (d,  $J = 15.0$  Hz, 1H), 4.15 (dt,  $J = 15.1, 1.3$  Hz, 1H), 3.75 (ddd,  $J = 10.2, 7.2, 1.6$  Hz, 1H), 3.41 (d,  $J = 12.3$  Hz, 1H), 3.29 (dd,  $J = 10.6, 7.2$  Hz, 1H), 3.11 (d,  $J = 12.3$  Hz, 1H), 3.07 (t,  $J = 10.4$  Hz, 1H).  $^{13}\text{C}$  NMR (176 MHz,  $\text{CDCl}_3$ )  $\delta$  162.4 (d,  $J = 247.3$  Hz), 146.5, 142.0, 135.2 (d,  $J = 3.1$  Hz), 128.4 (d,  $J = 8.0$  Hz), 116.7, 115.6 (d,  $J = 21.2$  Hz), 109.4, 87.2, 60.3, 43.8, 43.6, 36.7. HRMS calculated for  $[\text{C}_{15}\text{H}_{13}\text{O}_2\text{S}_F+\text{Na}]$ : 276.0620; found: 275.9634.

**(3aR,8bR)-3a-(Thiophen-3-yl)-3,3a,5,8b-tetrahydro-1H-furo[3,2-d]thieno[3,4-b]pyran**

**(6c)**

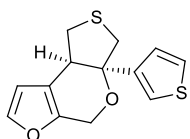

Following the general procedure product **4c** (>20:1 dr in a crude reaction mixture) was isolated in 43% yield as yellow oil.  $^1\text{H}$  NMR (700 MHz,  $\text{CDCl}_3$ )  $\delta$  7.29 – 7.25 (m, 2H), 7.11 (dd,  $J = 5.0, 1.4$  Hz, 1H), 7.07 (dd,  $J = 2.9, 1.4$  Hz, 1H), 6.36 (d,  $J = 1.9$  Hz, 1H), 4.63 (d,  $J = 14.7$  Hz, 1H), 4.20 (ddd,  $J = 14.9, 1.7, 1.0$  Hz, 1H), 3.65 (ddd,  $J = 10.0, 7.2, 1.6$  Hz, 1H), 3.44 (d,  $J = 12.2$  Hz, 1H), 3.27 (dd,  $J = 10.7, 7.3$  Hz, 1H), 3.20 (d,  $J = 12.2$  Hz, 1H), 3.02 (dd,  $J = 10.7, 10.1$  Hz, 1H).  $^{13}\text{C}$  NMR (176 MHz,  $\text{CDCl}_3$ )  $\delta$  146.7, 141.9, 141.1, 126.7, 126.1, 122.5, 116.8, 109.4, 85.6, 60.4, 45.3, 43.2, 36.8. HRMS calculated for  $[\text{C}_{14}\text{H}_{12}\text{O}_2\text{S}_2+\text{Na}]$ : 264.0279; found: 264.0283.

## 5. Crystal and X-ray data

The compound **6n** ( $C_{15}H_{16}O_2S_2$ ) crystallizes in the non-centrosymmetric triclinic space group  $P1$  ( $Z = 2$ ) and the crystal structure consists of two crystallographically independent formula units in the unit cell.

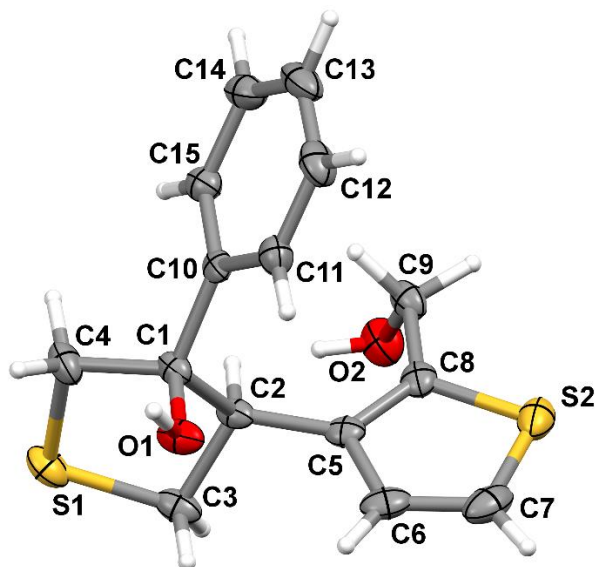

A view of one of the two unique molecules present in the asymmetric unit of **6n**, with the atom-numbering scheme. Displacement ellipsoids drawn at the 50% probability level.

Hydrogen atoms are drawn with an arbitrary radius

Single-crystal X-ray diffraction data were collected at temperature of 100 K. The compound **4a** ( $C_{15}H_{14}O_2S$ ) crystallizes in the non-centrosymmetric monoclinic space group  $P2_1$  ( $Z = 2$ ) and the crystal structure consists of one crystallographically independent formula unit in the unit cell.

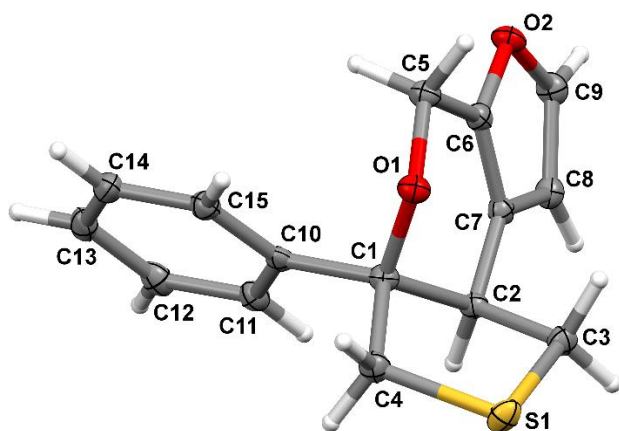

A view of the molecule of **4a** with displacement ellipsoids drawn at the 50% probability level.

Hydrogen atoms are drawn with an arbitrary radius

Single crystal X-ray diffraction data were collected at 100 K by the  $\omega$ -scan technique using a RIGAKU XtaLAB Synergy, Dualflex, Pilatus 300K diffractometer<sup>3</sup> with PhotonJet micro-focus X-ray Source Cu-K $\alpha$  ( $\lambda = 1.54184 \text{ \AA}$ ). Data collection, cell refinement, data reduction and absorption correction were performed using CrysAlis PRO software.<sup>3</sup> The crystal structure was solved by using direct methods with the SHELXT 2018/2 program.<sup>4</sup> Atomic scattering factors were taken from the International Tables for X-ray Crystallography. Positional parameters of non-H-atoms were refined by a full-matrix least-squares method on  $F^2$  with anisotropic thermal parameters by using the SHELXL 2018/3 program.<sup>5</sup> All hydrogen atoms were placed in calculated positions (O–H = 0.84  $\text{\AA}$ , C–H = 0.95–1.00  $\text{\AA}$ ) and included as riding contributions with isotropic displacement parameters set to 1.2–1.5 times the  $U_{\text{eq}}$  of the parent atom.

**6n:** Formula  $\text{C}_{15}\text{H}_{16}\text{O}_2\text{S}_2$ , monoclinic, space group  $P1$ ,  $Z = 2$ , unit cell constants  $a = 8.0197(1)$ ,  $b = 9.6836(1)$ ,  $c = 10.1550(2) \text{ \AA}$ ,  $\beta = 63.873(2)^\circ$ ,  $V = 702.42(2) \text{ \AA}^3$ . The integration of the data yielded a total of 15510 reflections with  $\theta$  angles in the range of 4.86 to 69.99 of which 4979 reflections were unique ( $R_{\text{int}} = 1.40\%$ ), and 4973 were greater than  $2\sigma(F^2)$ . The final anisotropic full-matrix least-squares refinement on  $F^2$  with 346 parameters converged to  $R_1 = 2.93\%$  and  $wR_2 = 7.38\%$  for all data. The goodness-of-fit was 1.047. The largest peak in the final difference electron density synthesis was  $0.40 \text{ e \AA}^{-3}$  and the largest hole was  $-0.46 \text{ e \AA}^{-3}$ . The absolute configuration was determined from anomalous scattering, by calculating the  $x$  Flack parameter<sup>6</sup> of 0.001(6) using 2325 quotients.

**4a:** Formula  $\text{C}_{15}\text{H}_{14}\text{O}_2\text{S}$ , monoclinic, space group  $P2_1$ ,  $Z = 2$ , unit cell constants  $a = 7.3707(1)$ ,  $b = 10.3546(1)$ ,  $c = 8.6086(1) \text{ \AA}$ ,  $\beta = 108.874(1)^\circ$ ,  $V = 621.688(13) \text{ \AA}^3$ . The integration of the data yielded a total of 21876 reflections with  $\theta$  angles in the range of 6.35 to 66.58 of which 2177 were independent ( $R_{\text{int}} = 2.05\%$ ), and all were greater than  $2\sigma(F^2)$ . The final anisotropic full-matrix least-squares refinement on  $F^2$  with 163 parameters converged to  $R_1 = 1.94\%$  and  $wR_2 = 5.11\%$  for all data. The goodness-of-fit was 1.054. The largest peak in the final difference electron density synthesis was  $0.19 \text{ e \AA}^{-3}$  and the largest hole was  $-0.15 \text{ e \AA}^{-3}$ . The absolute configuration was determined from anomalous scattering, by calculating the  $x$  Flack parameter<sup>6</sup> of 0.003(7) using 1020 quotients.

CCDC 2024877 (**6n**) and 2024876 (**4a**) contain the supplementary crystallographic data for this paper. These data can be obtained free of charge from The Cambridge Crystallographic Data Centre via [www.ccdc.cam.ac.uk/structures](http://www.ccdc.cam.ac.uk/structures).

3. Rigaku OD. CrysAlis PRO. Rigaku Oxford Diffraction Ltd, Yarnton, Oxfordshire, England, 2019.

4. G. M. Sheldrick, *Acta Cryst.* 2015, **A71**, 3-8.

5. G. M. Sheldrick, *Acta Cryst.* 2015, **C71**, 3-8.

6. S. Parsons, H. D. Flack, T. Wagner, *Acta Cryst.* 2013, **B69**, 249-259.



## 6. NMR data

### (3*R*,4*R*)-4-(2-(Hydroxymethyl)furan-3-yl)-3-phenyltetrahydrothiophen-3-ol (6a) <sup>1</sup>H NMR

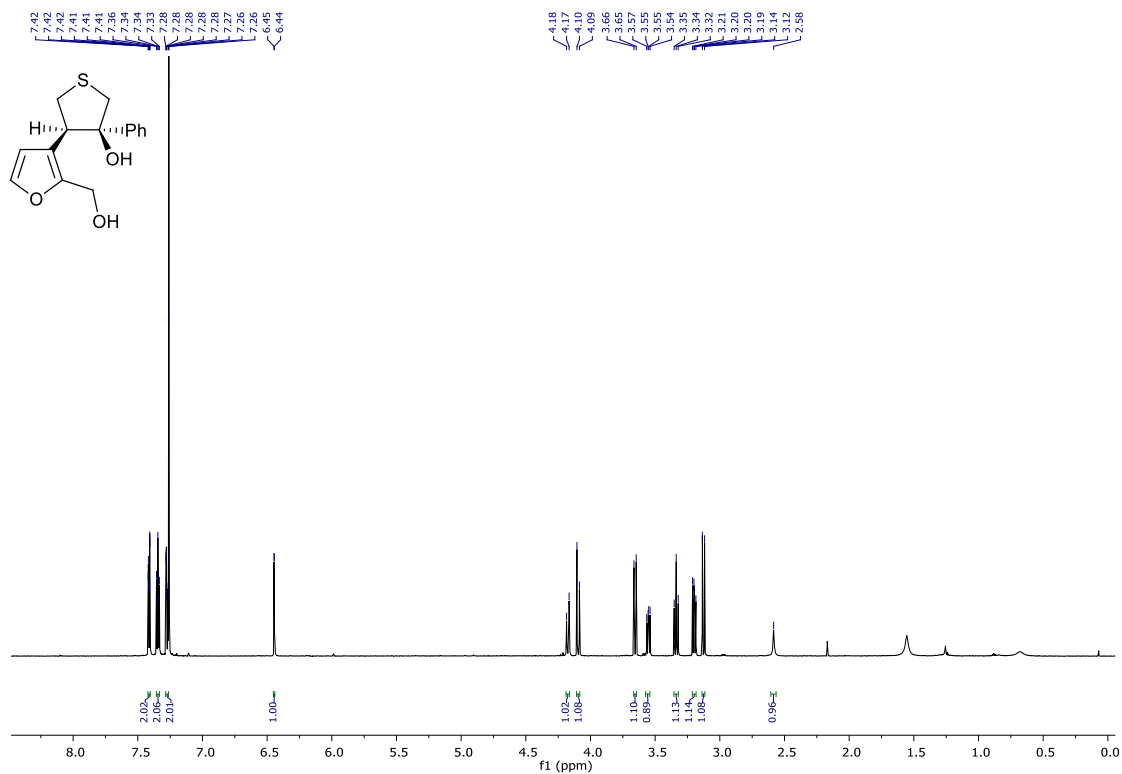

### <sup>13</sup>C NMR

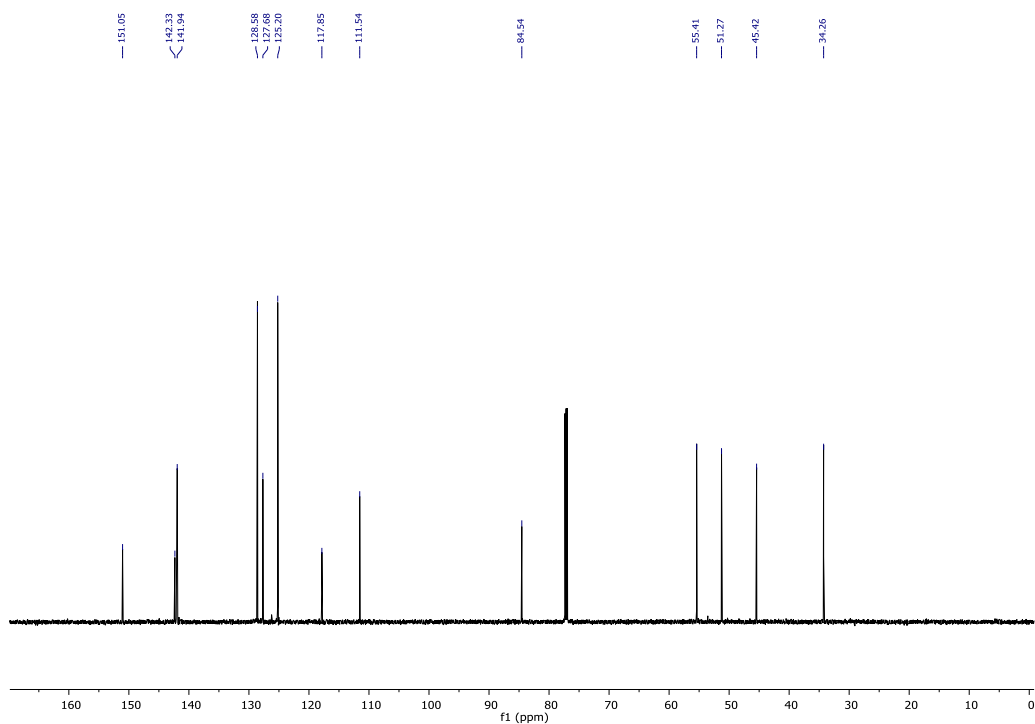

**(3*S*,4*S*)-4-(2-(Hydroxymethyl)furan-3-yl)-3-(2-methoxyphenyl)tetrahydrothiophen-3-ol**  
**(6b)**  
<sup>1</sup>H NMR

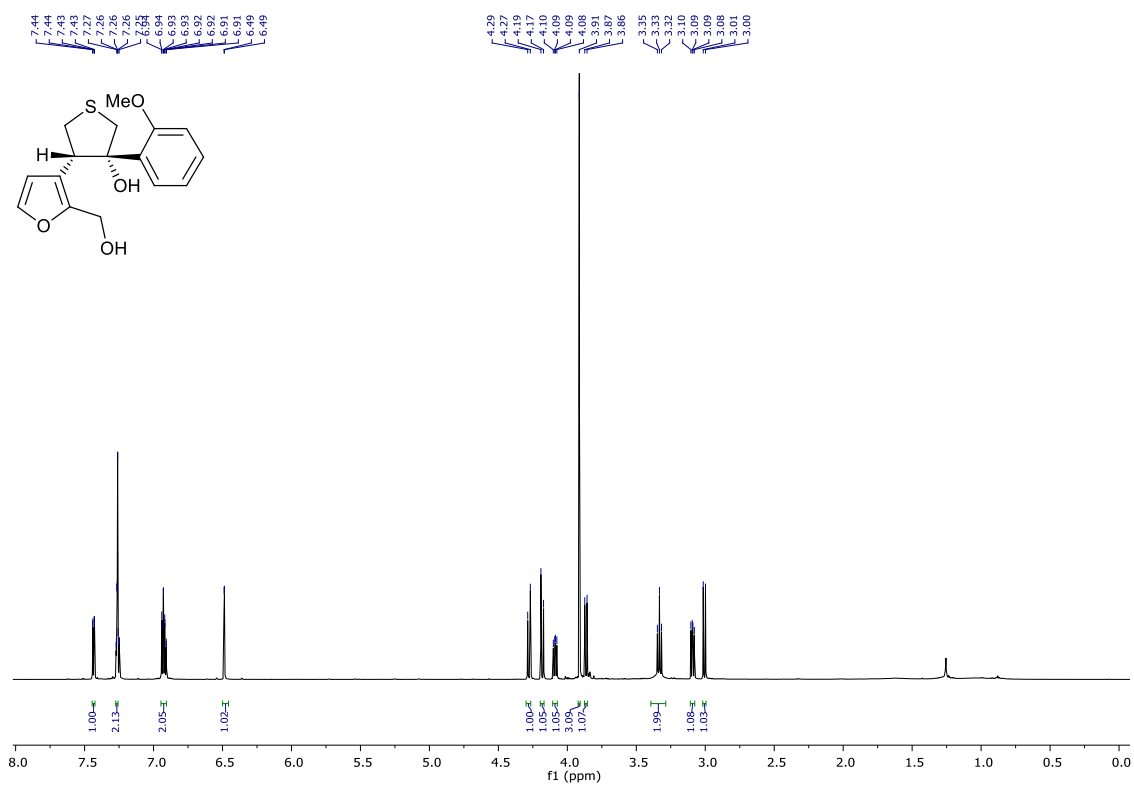

<sup>13</sup>C NMR

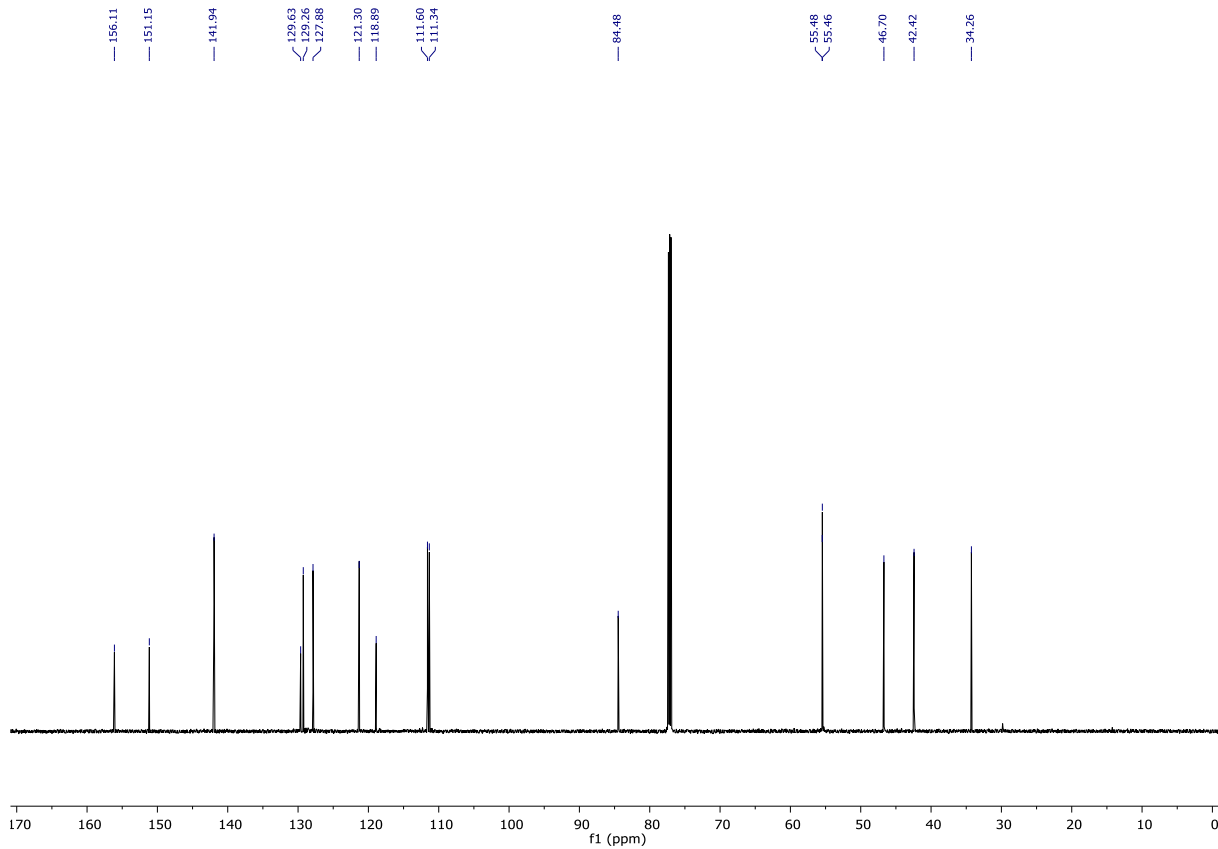

**(3*S*,4*S*)-4-(2-(Hydroxymethyl)furan-3-yl)-3-(3-methoxyphenyl)tetrahydrothiophen-3-ol**  
**(6c)**

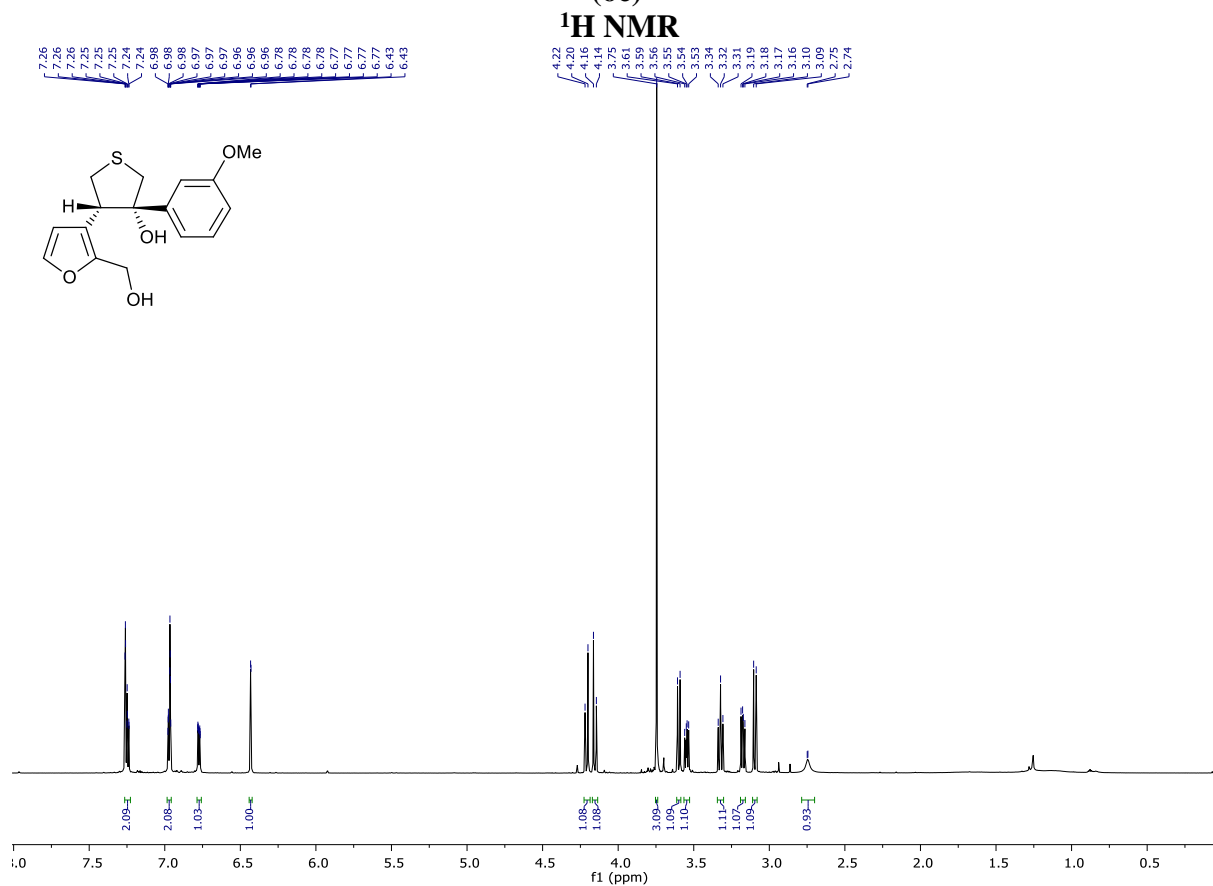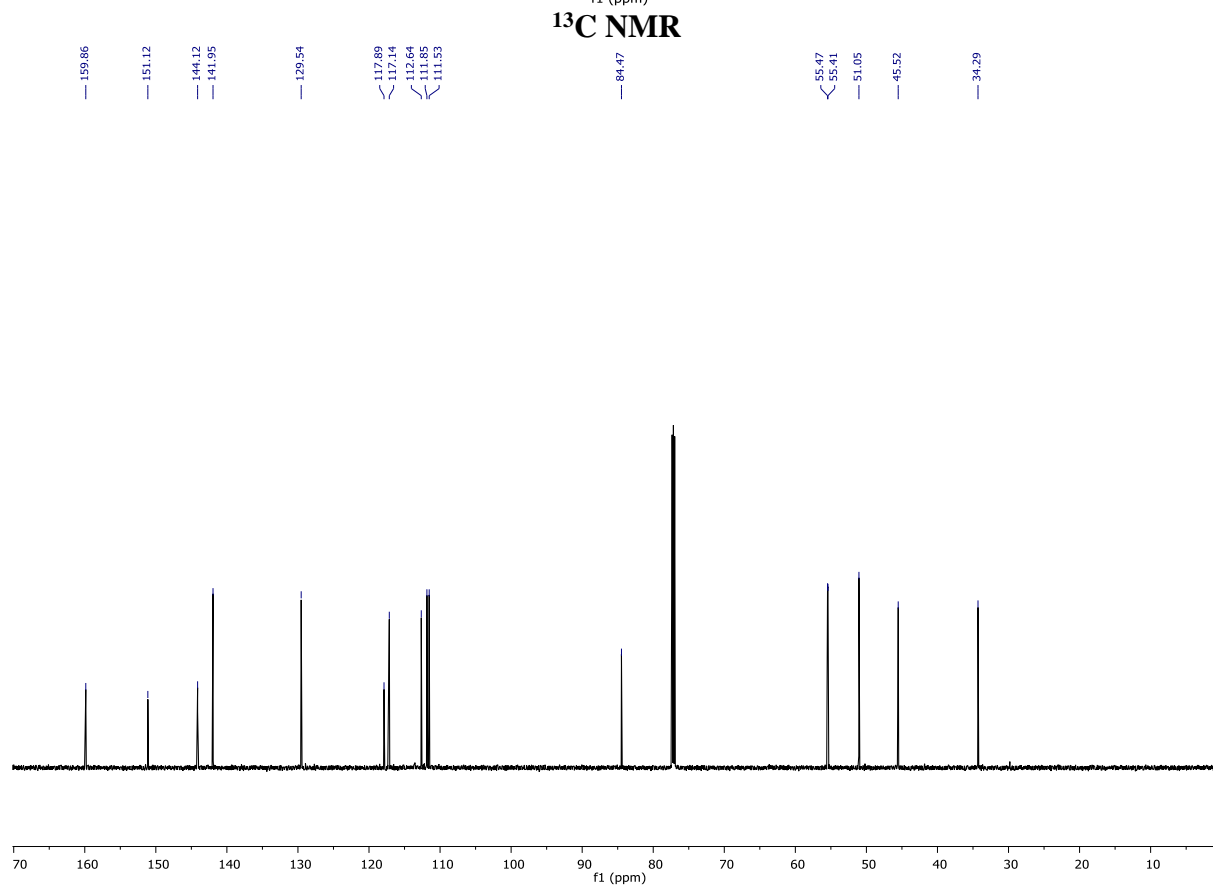

**(3*S*,4*S*)-4-(2-(Hydroxymethyl)furan-3-yl)-3-(4-methoxyphenyl)tetrahydrothiophen-3-ol**  
**(6d)**

**<sup>1</sup>H NMR**

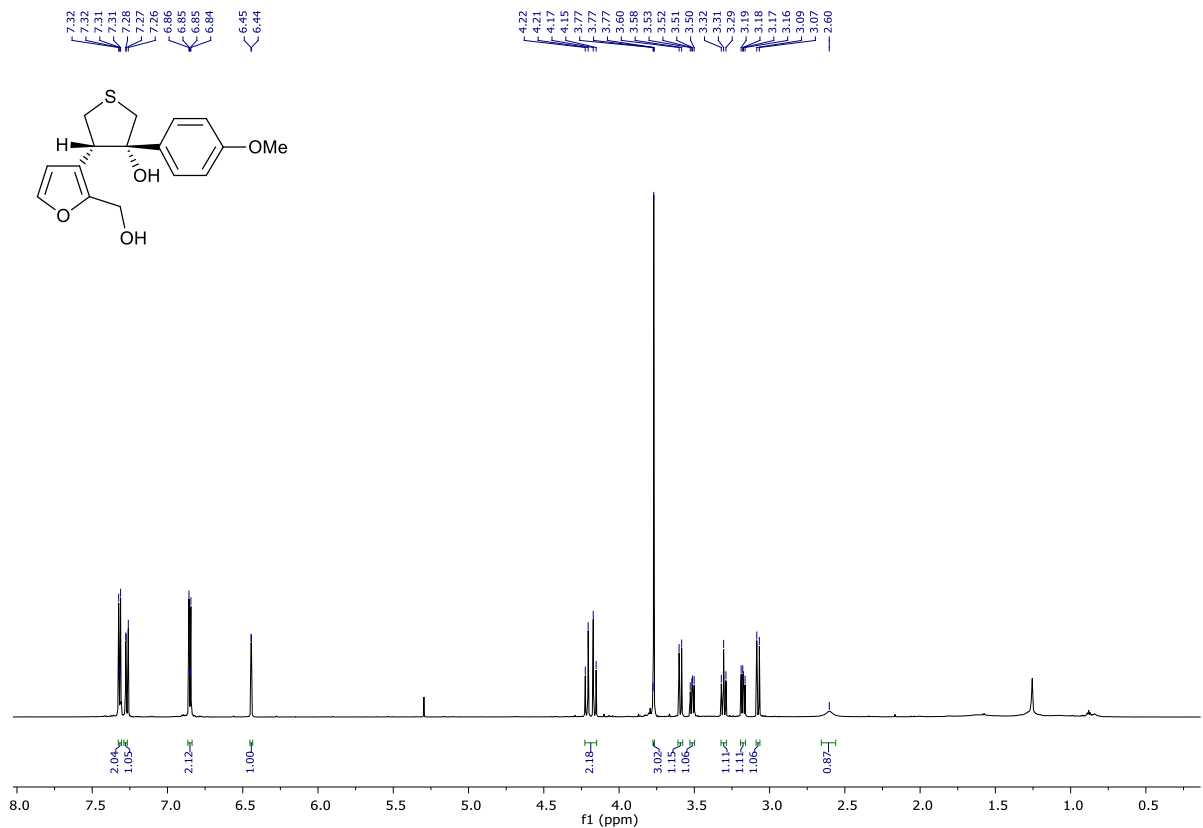

**<sup>13</sup>C NMR**

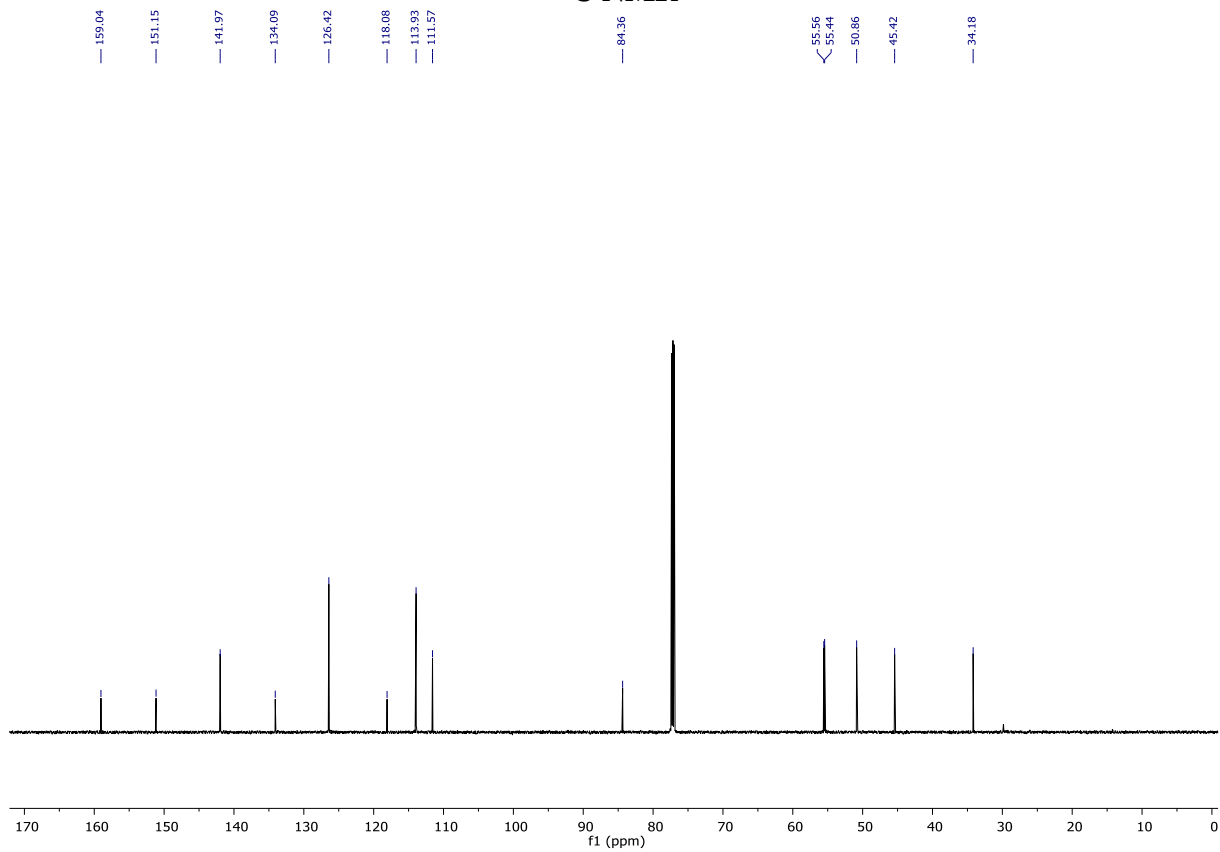

(3*S*,4*S*)-4-(2-(Hydroxymethyl)furan-3-yl)-3-(*p*-tolyl)tetrahydrothiophen-3-ol (6e)  
<sup>1</sup>H NMR

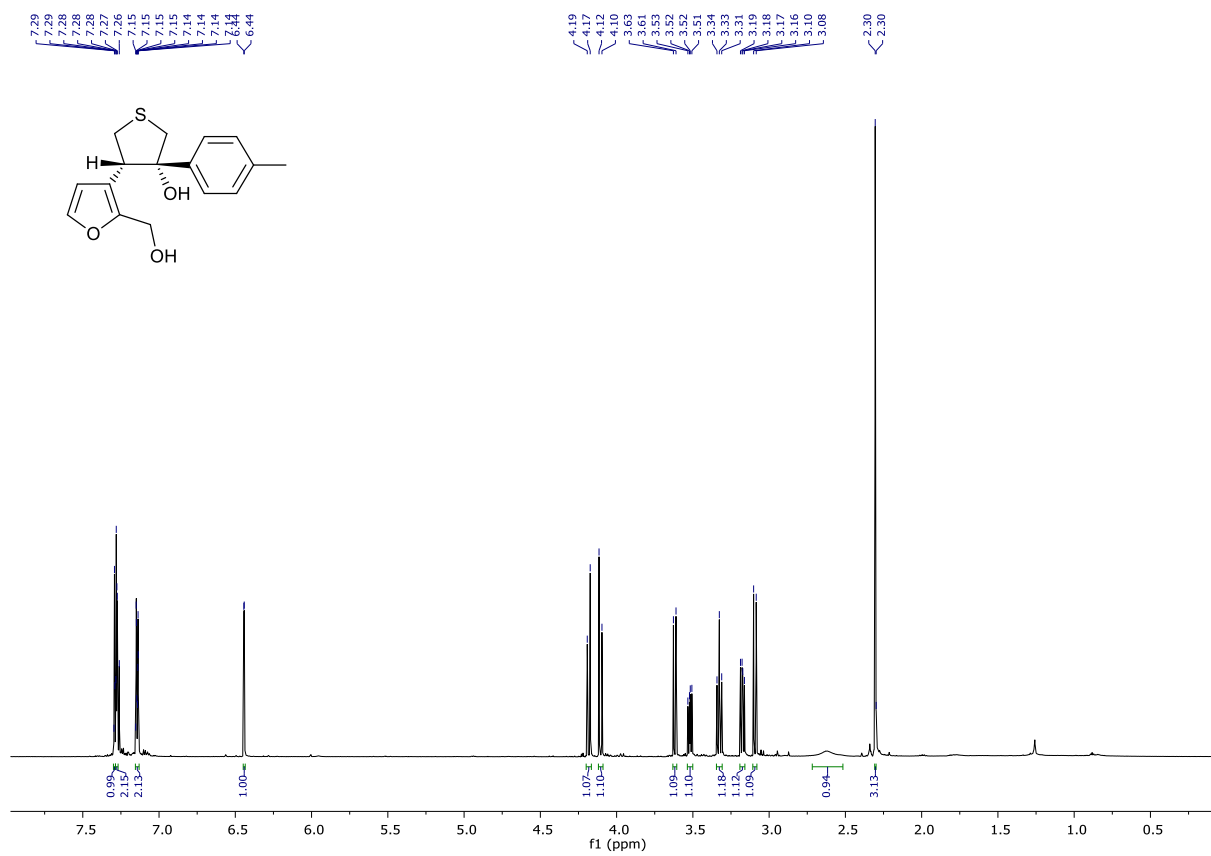

<sup>13</sup>C NMR

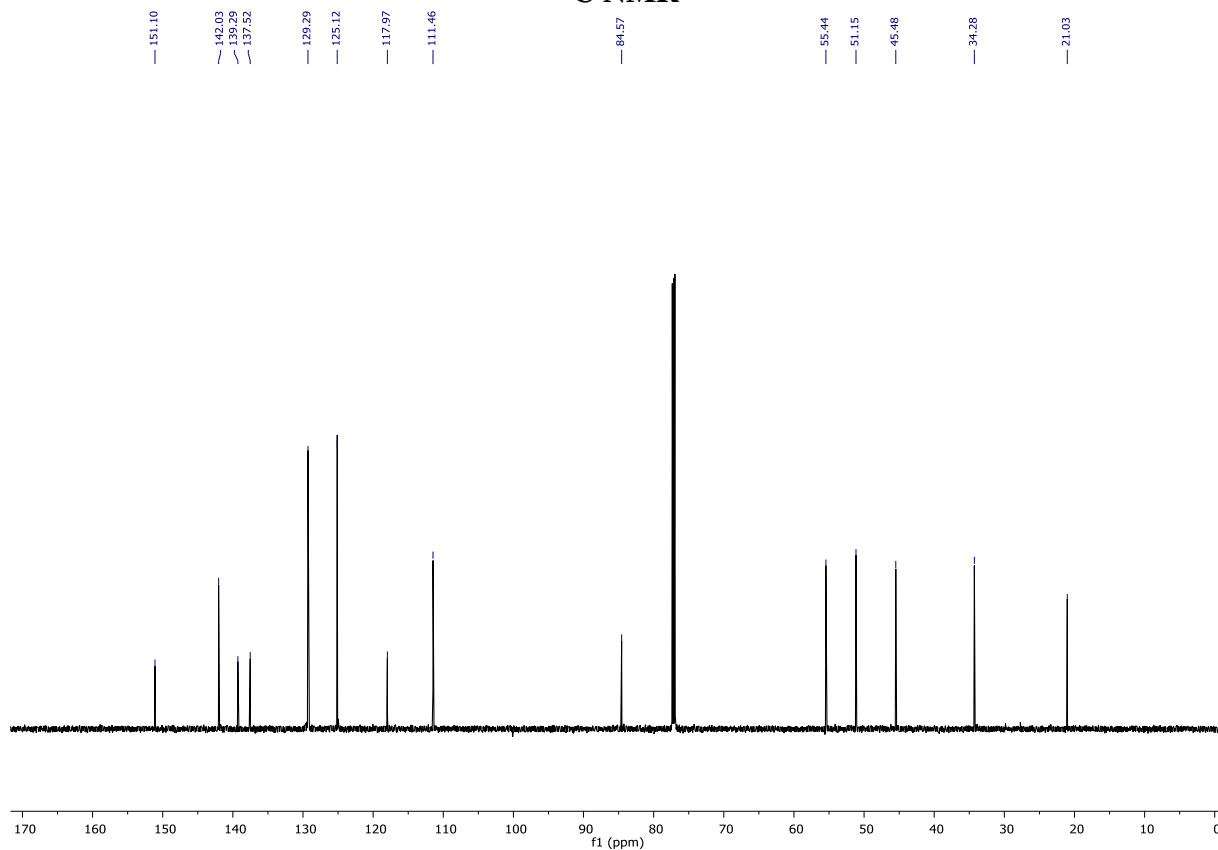

**(3*S*,4*S*)-3-(2-Fluorophenyl)-4-(2-(hydroxymethyl)furan-3-yl)tetrahydrothiophen-3-ol (6f)**

**<sup>1</sup>H NMR**

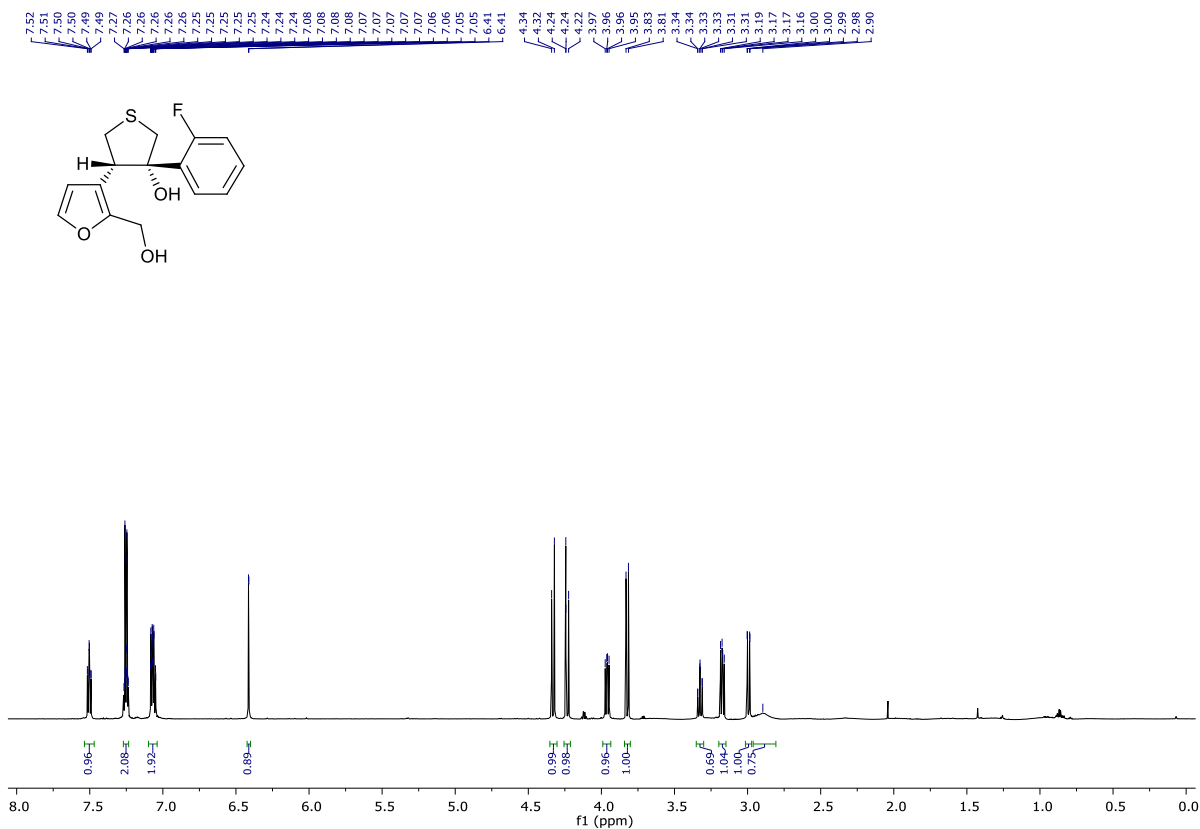

**<sup>13</sup>C NMR**

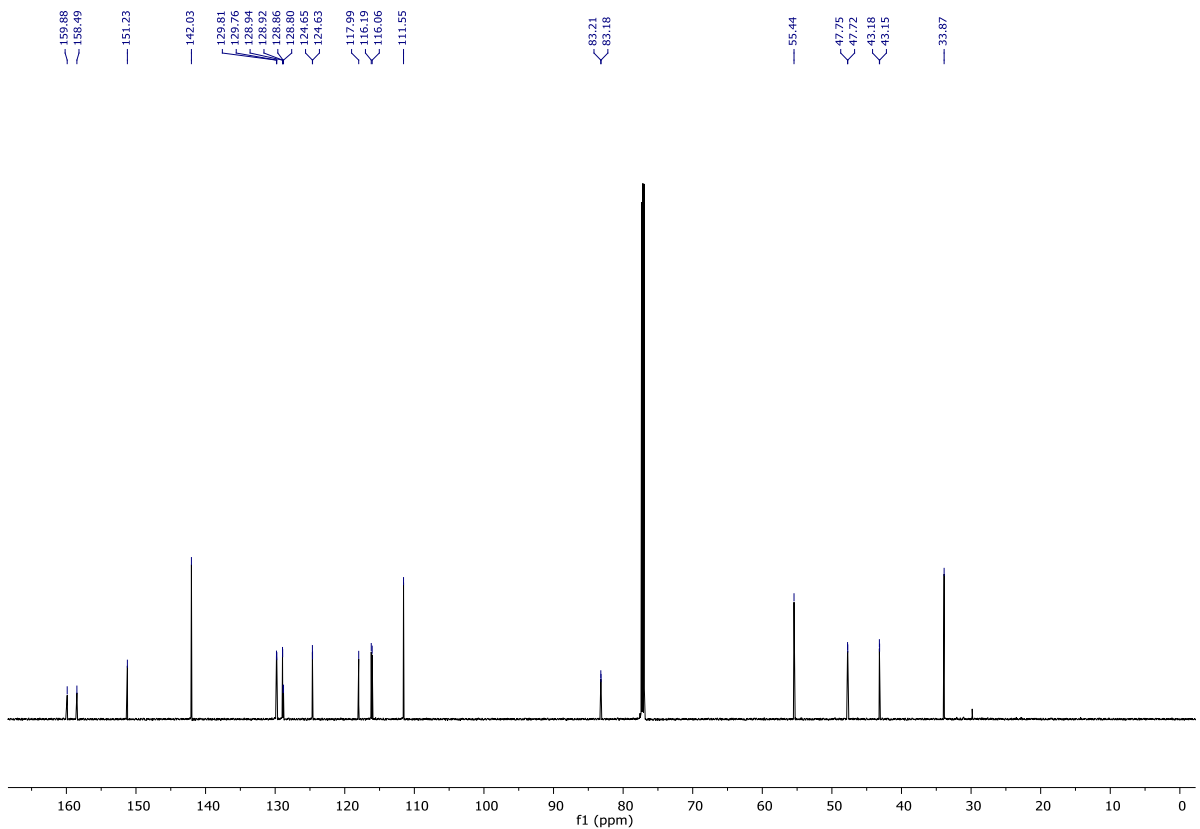



**(3*S*,4*S*)-3-(4-Fluorophenyl)-4-(2-(hydroxymethyl)furan-3-yl)tetrahydrothiophen-3-ol  
(6h)  
<sup>1</sup>H NMR**

7.40  
7.39  
7.39  
7.39  
7.38  
7.38  
7.26  
7.25  
7.01  
7.00  
7.00  
6.99  
6.82  
6.82  
6.41

4.25  
4.23  
4.22  
4.20  
3.57  
3.55  
3.54  
3.54  
3.53  
3.52  
3.30  
3.29  
3.27  
3.20  
3.19  
3.17  
3.08  
3.07  
2.83

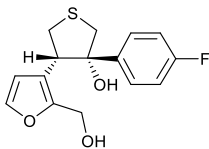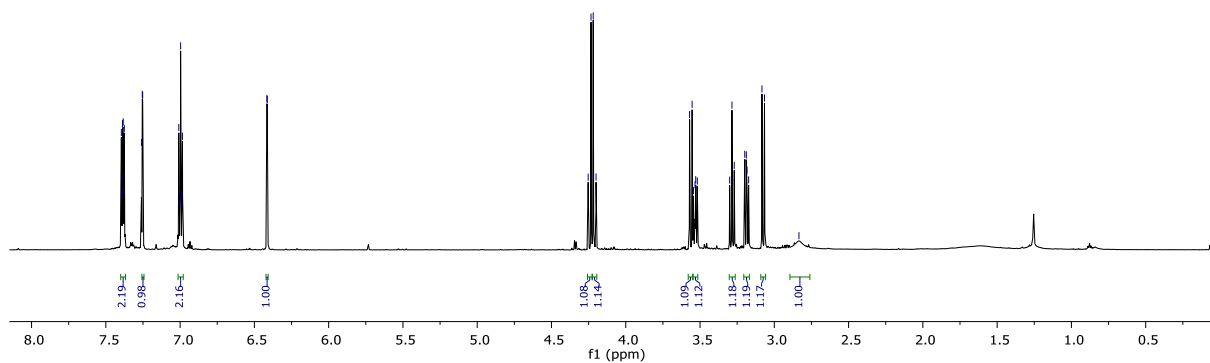

**<sup>13</sup>C NMR**

162.68  
161.26  
150.97  
141.80  
137.72  
137.70  
126.93  
126.89  
117.79  
115.30  
115.18  
111.59

83.97  
55.49  
50.63  
45.39  
33.95

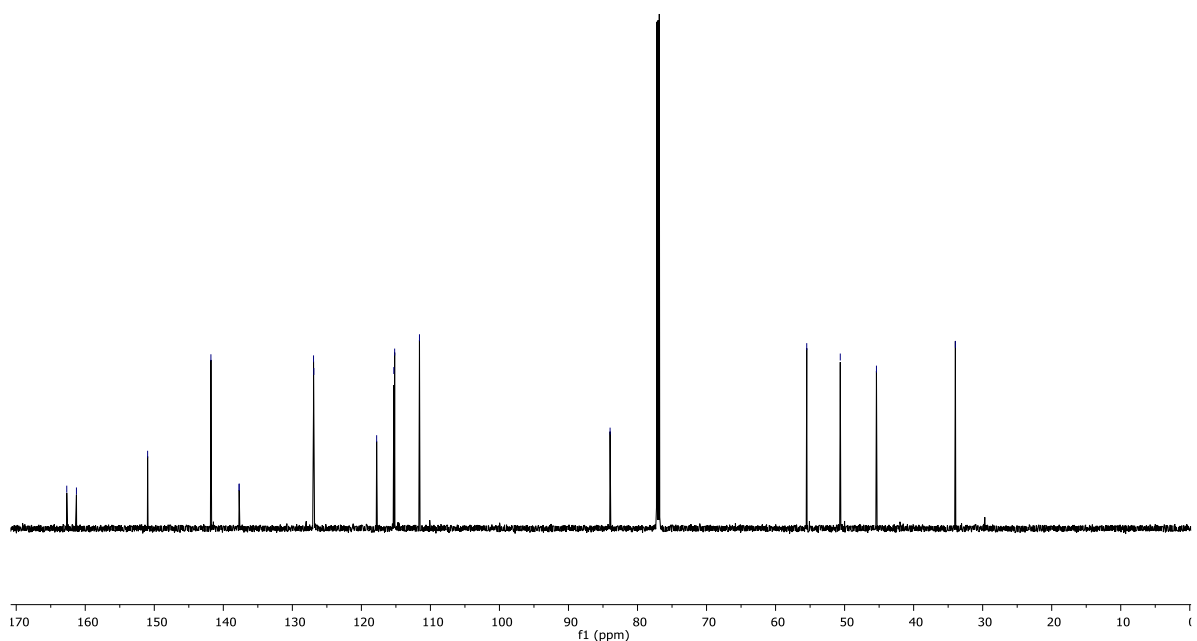



**(3*S*,4*S*)-3-(4-Chlorophenyl)-4-(2-(hydroxymethyl)furan-3-yl)tetrahydrothiophen-3-ol (6i)**

**<sup>1</sup>H NMR**

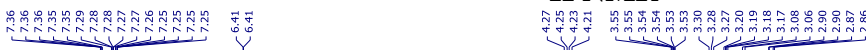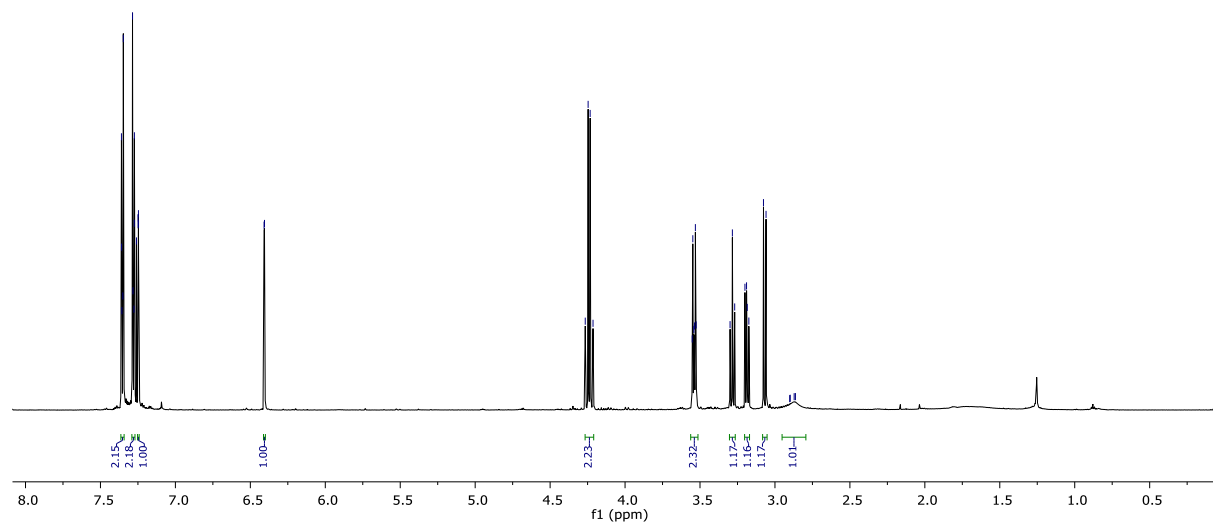

**<sup>13</sup>C NMR**

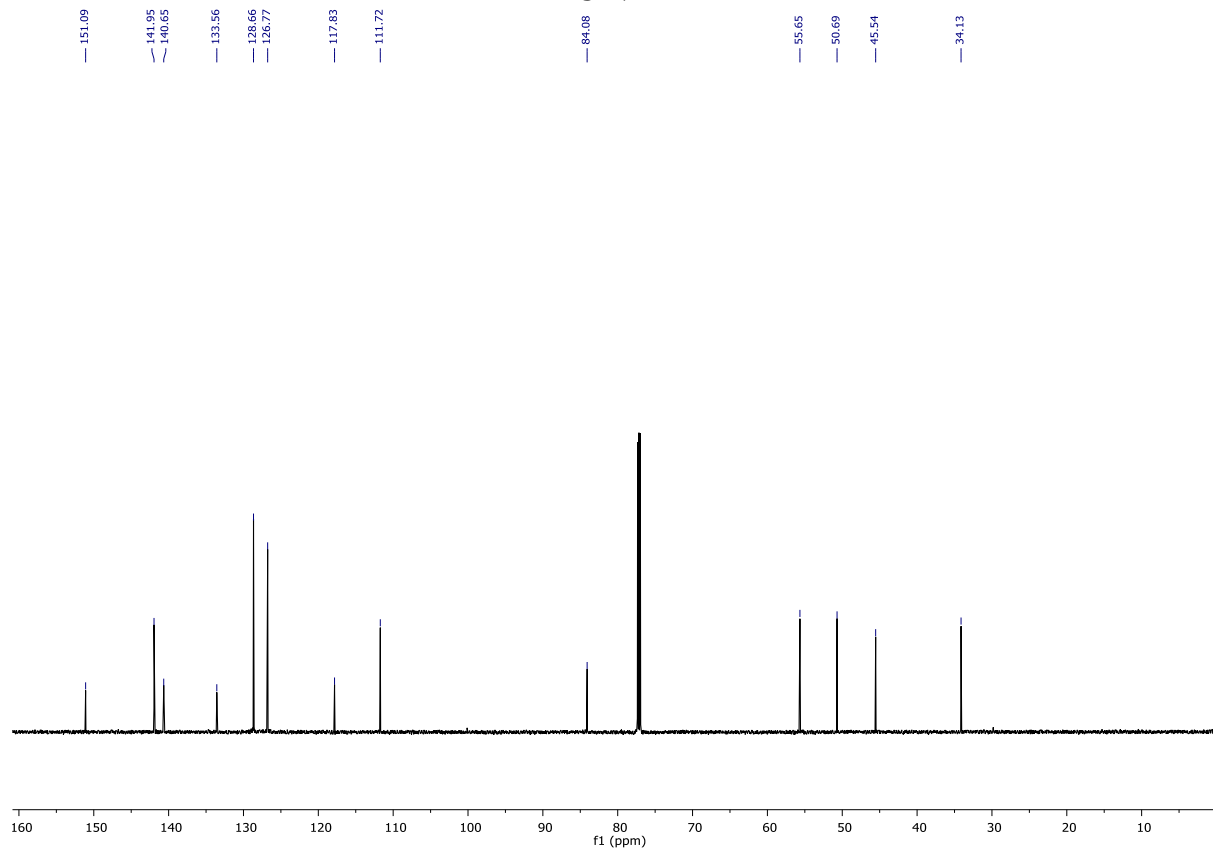

**(3*R*,4*R*)-4-(2-(Hydroxymethyl)furan-3-yl)-3-(4-(trifluoromethyl)phenyl) tetrahydrothiophen-3-ol (6j)**  
**<sup>1</sup>H NMR**

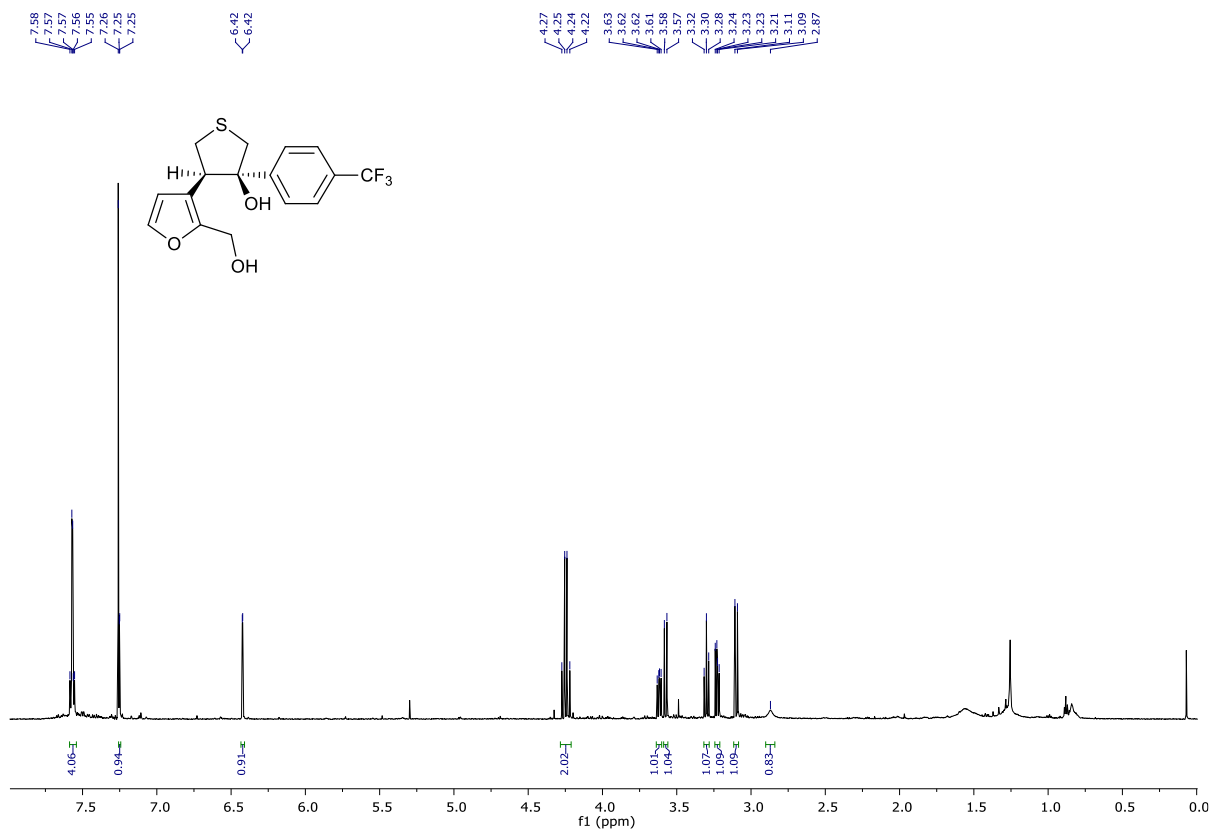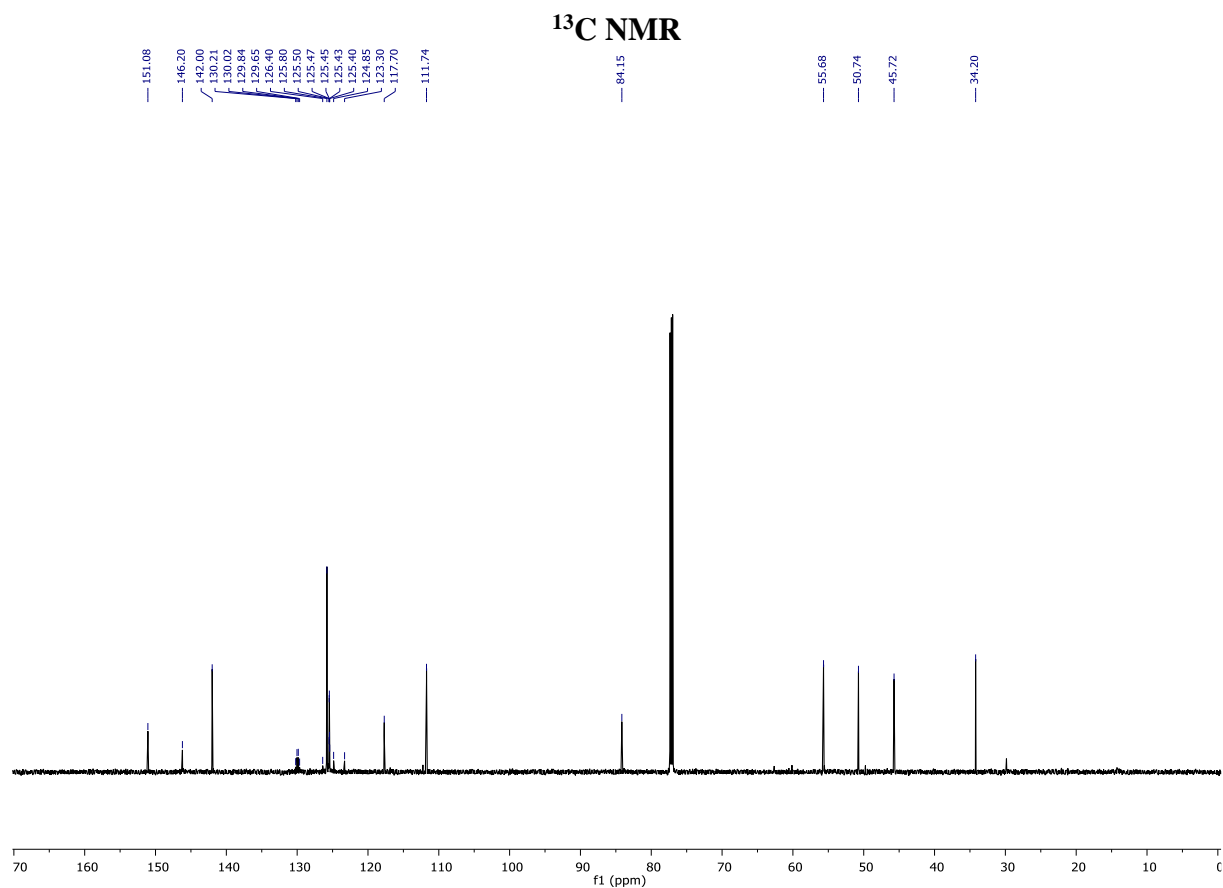

**(3*R*,4*R*)-4-(2-(Hydroxymethyl)furan-3-yl)-3-(naphthalen-2-yl)tetrahydrothiophen-3-ol**  
**(6k)**

**<sup>1</sup>H NMR**

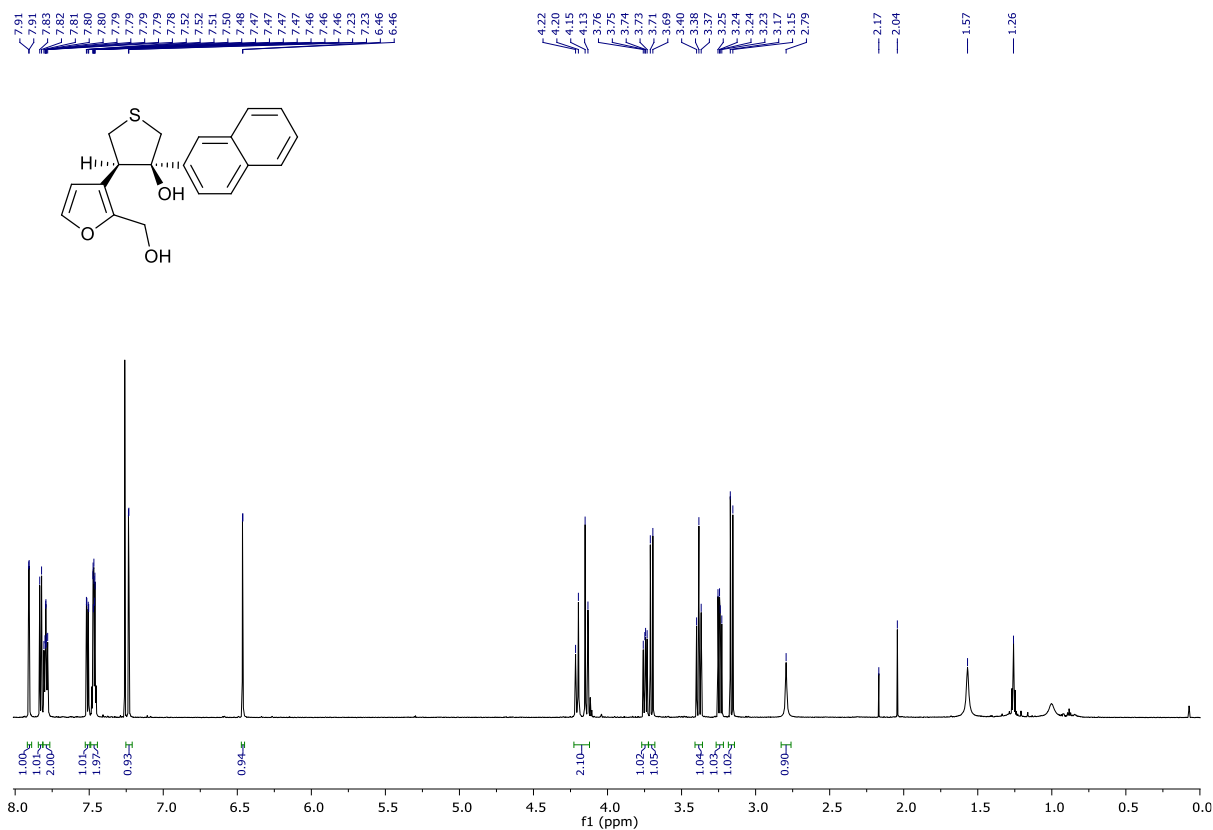

**<sup>13</sup>C NMR**

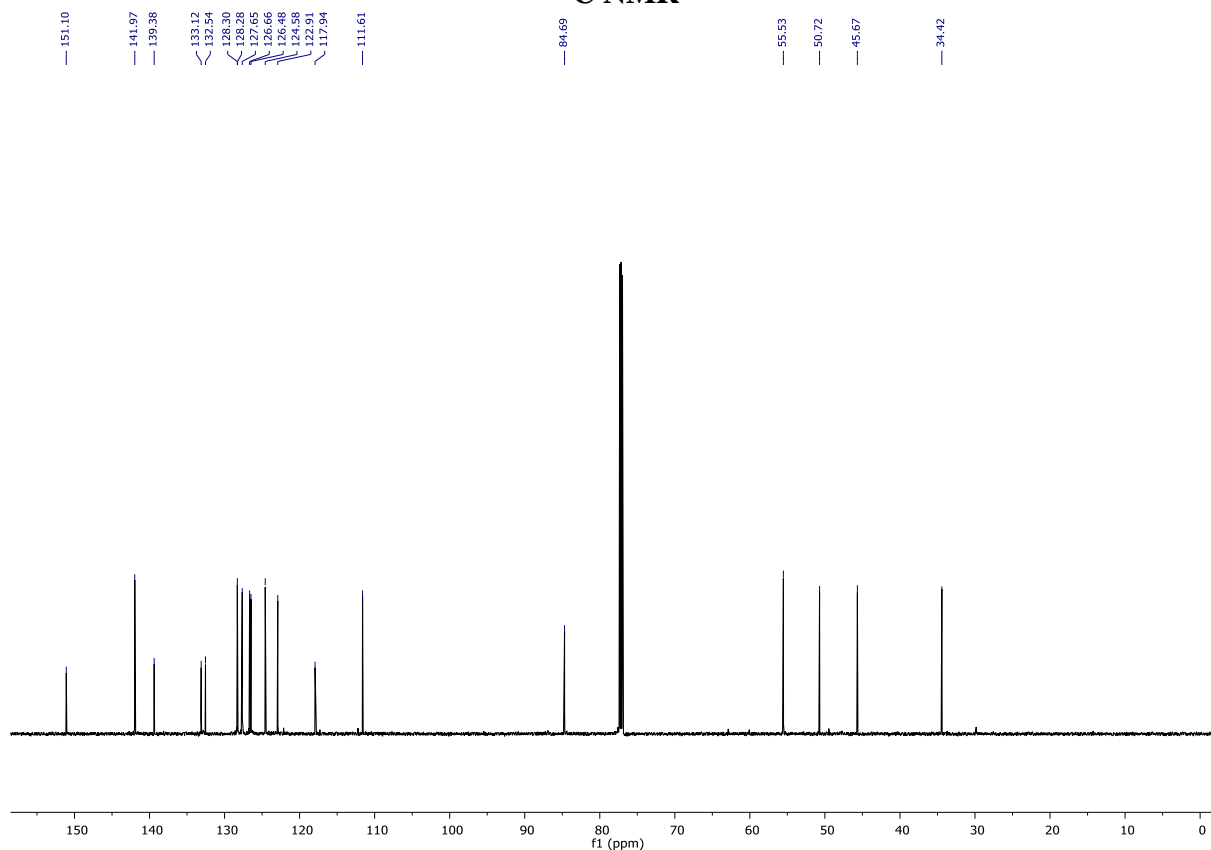

**(3*S*,4*S*)-3-(3,4-Dichlorophenyl)-4-(2-(hydroxymethyl)furan-3-yl)tetrahydrothiophen-3-ol**  
**(6l)**

**<sup>1</sup>H NMR**

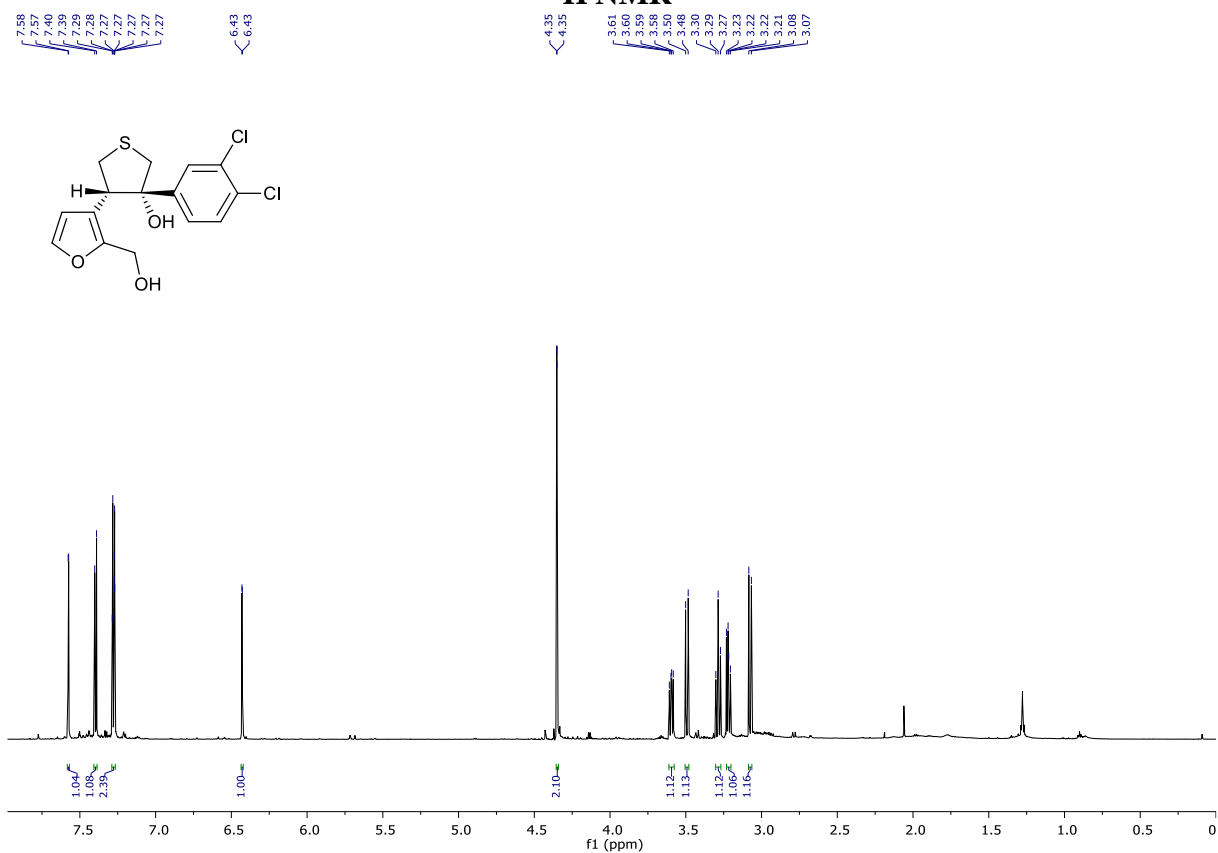

**<sup>13</sup>C NMR**

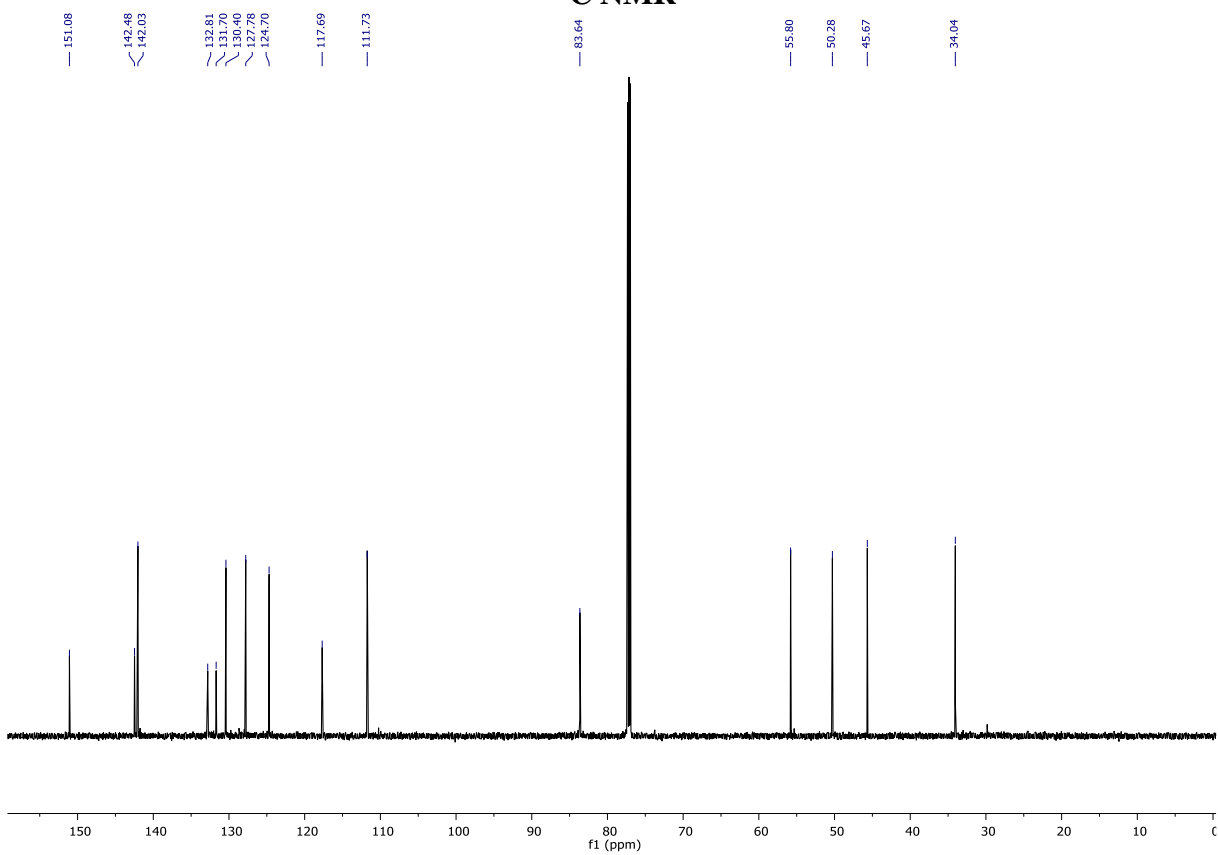

**(3*R*,4*R*)-4-(2-(Hydroxymethyl)furan-3-yl)-3-(thiophen-3-yl)tetrahydrothiophen-3-ol (6m)**  
**<sup>1</sup>H NMR**

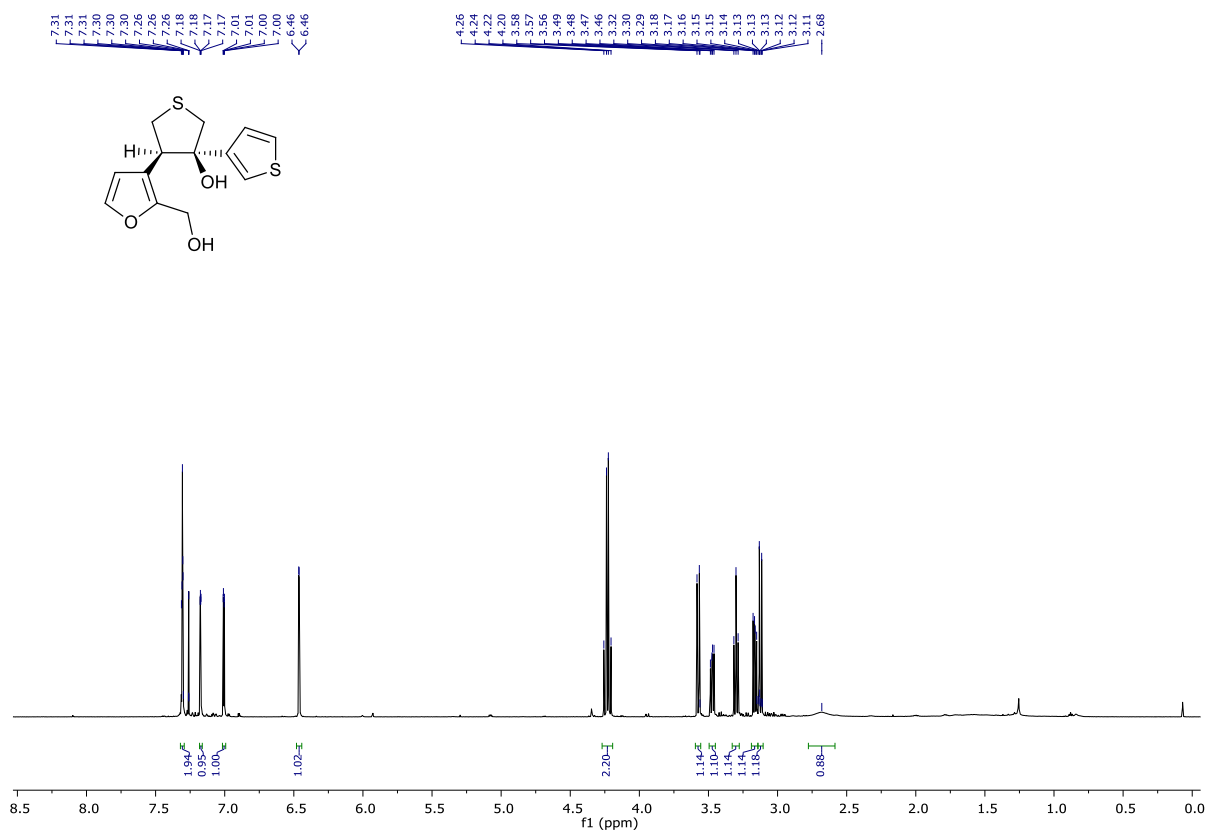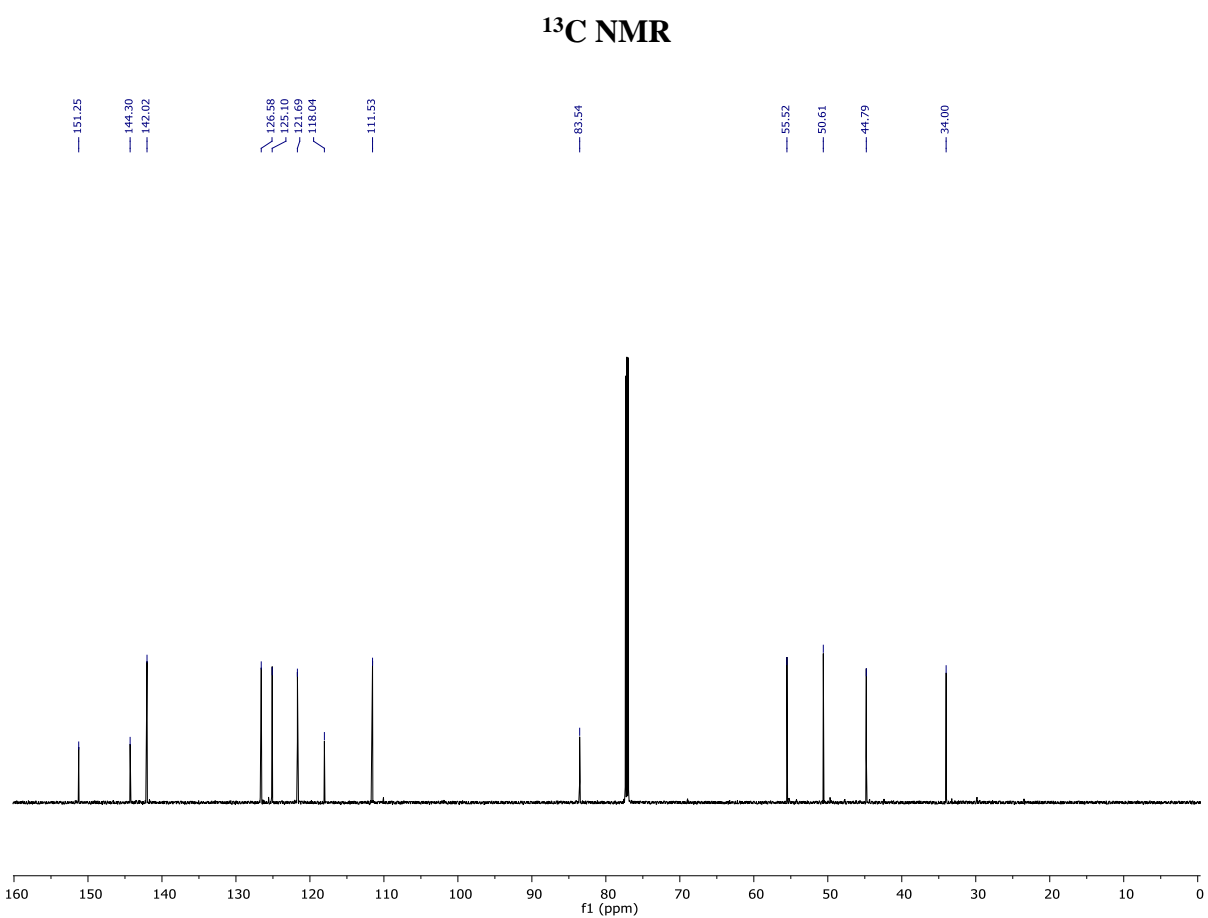

**(3R,4R)-4-(2-(Hydroxymethyl)thiophen-3-yl)-3-phenyltetrahydrothiophen-3-ol (6n)**

**<sup>1</sup>H NMR**

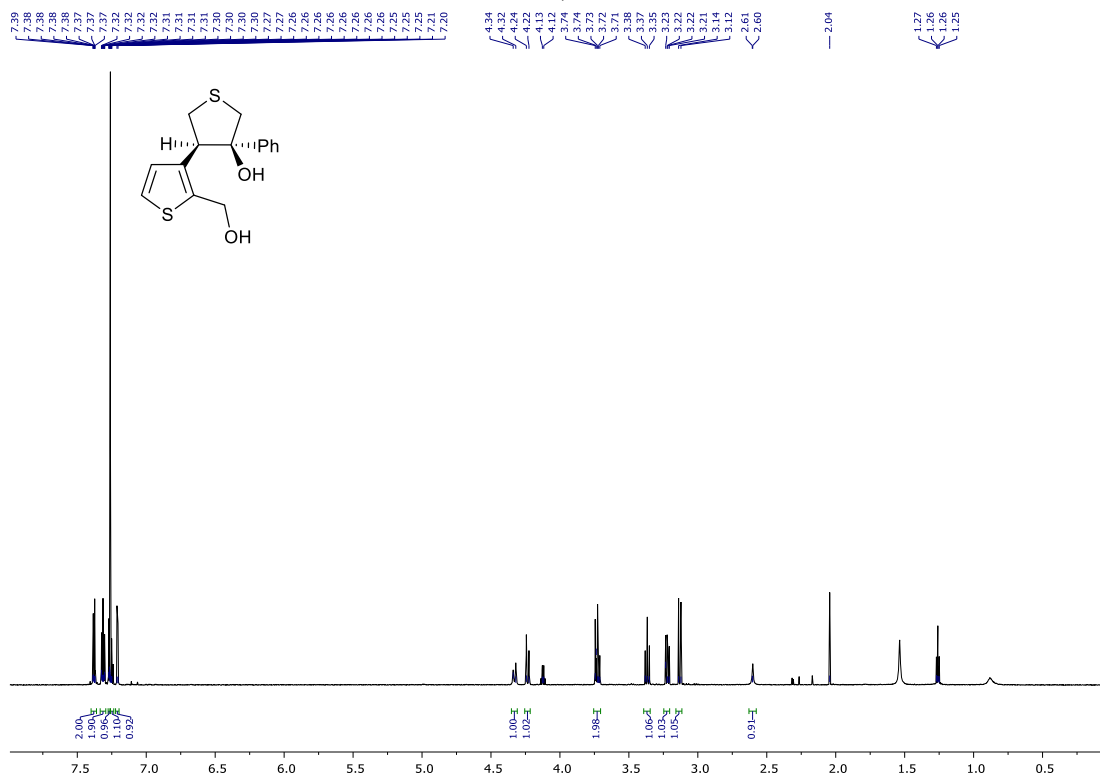

**<sup>13</sup>C NMR**

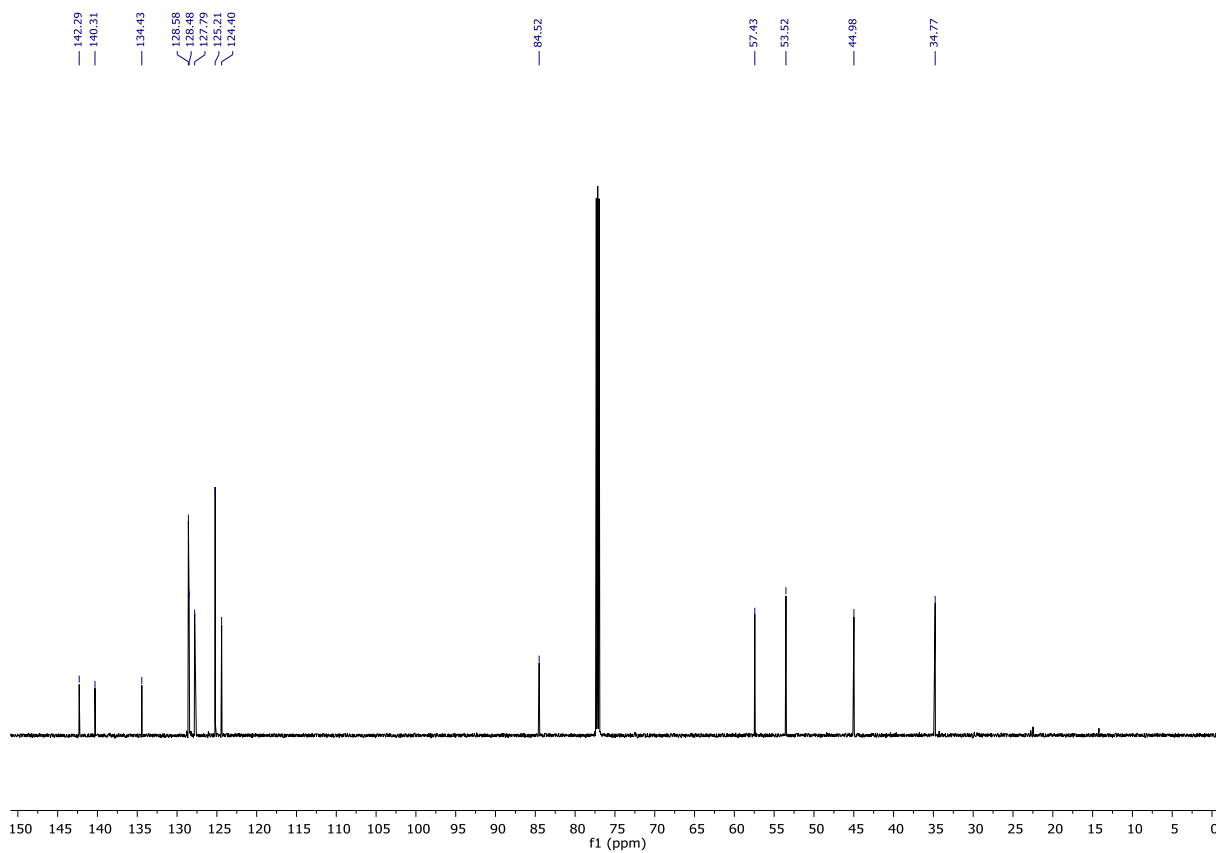

**(3*R*,4*R*)-4-(2-(Hydroxymethyl)benzofuran-3-yl)-3-phenyltetrahydrothiophen-3-ol (6o)**

**<sup>1</sup>H NMR**

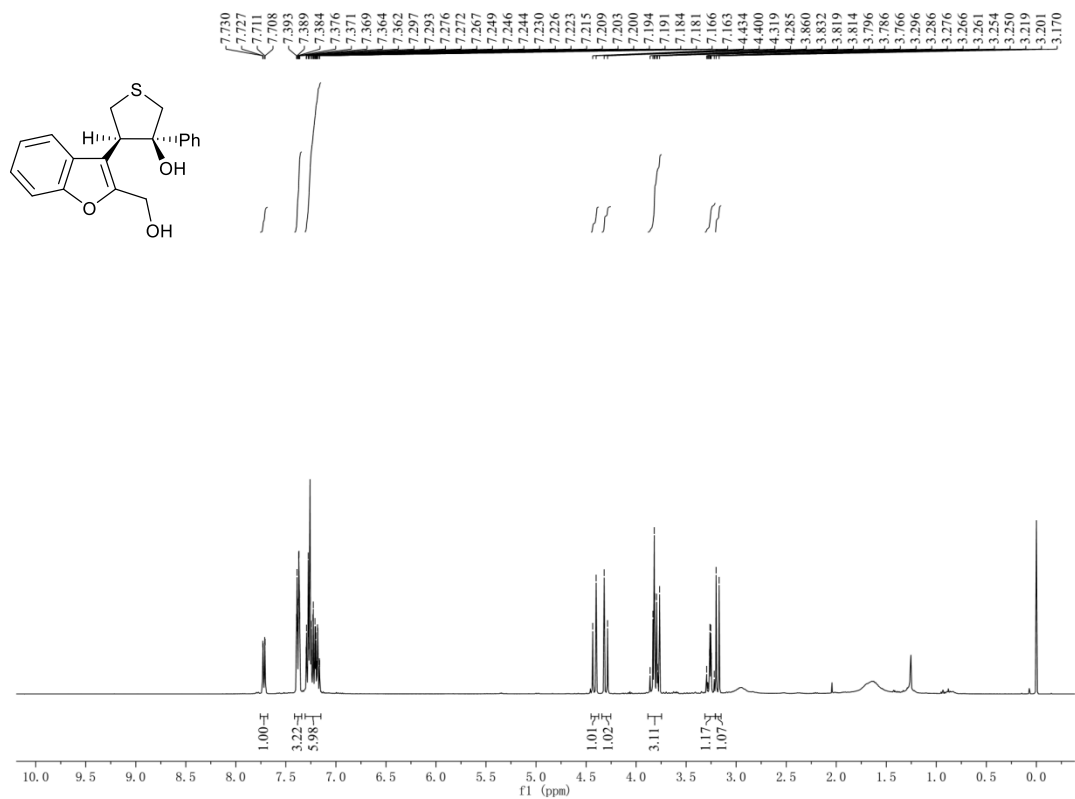

**<sup>13</sup>C NMR**

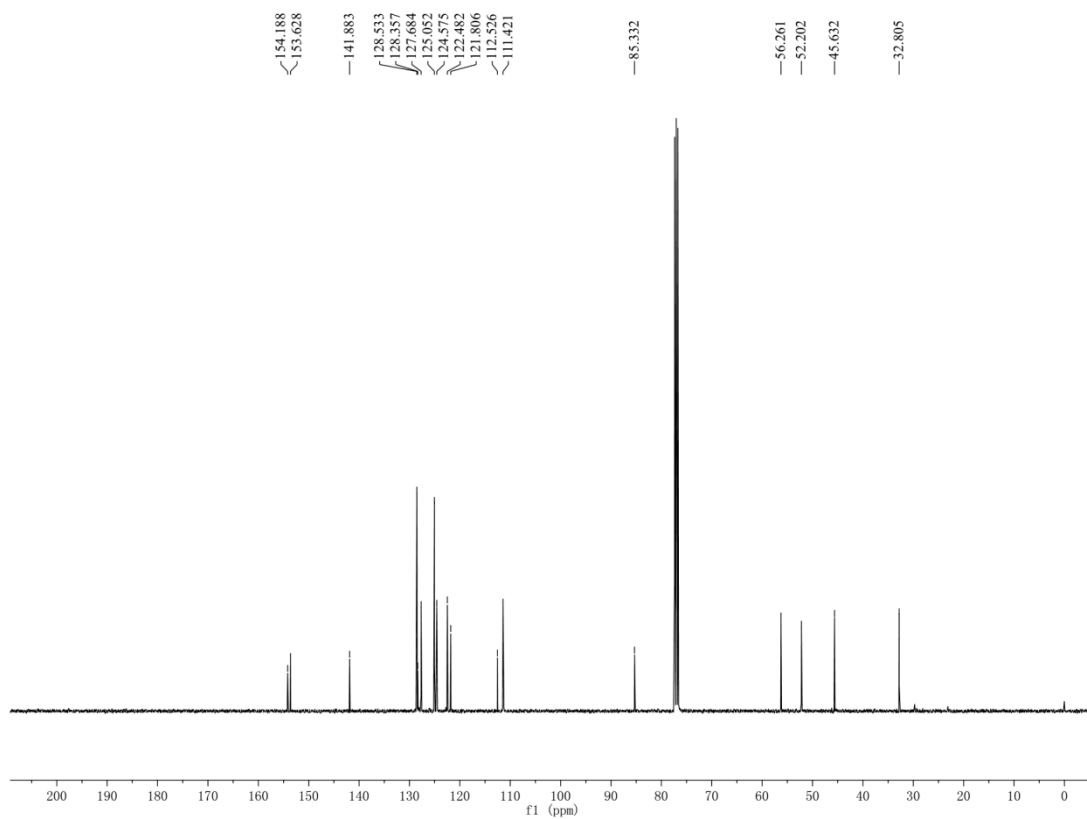

(3*R*,8*R*)-3*a*-Phenyl-3,3*a*,5,8*b*-tetrahydro-1*H*-furo[3,2-*d*]thieno[3,4-*b*]pyran (4*a*)  
<sup>1</sup>H NMR

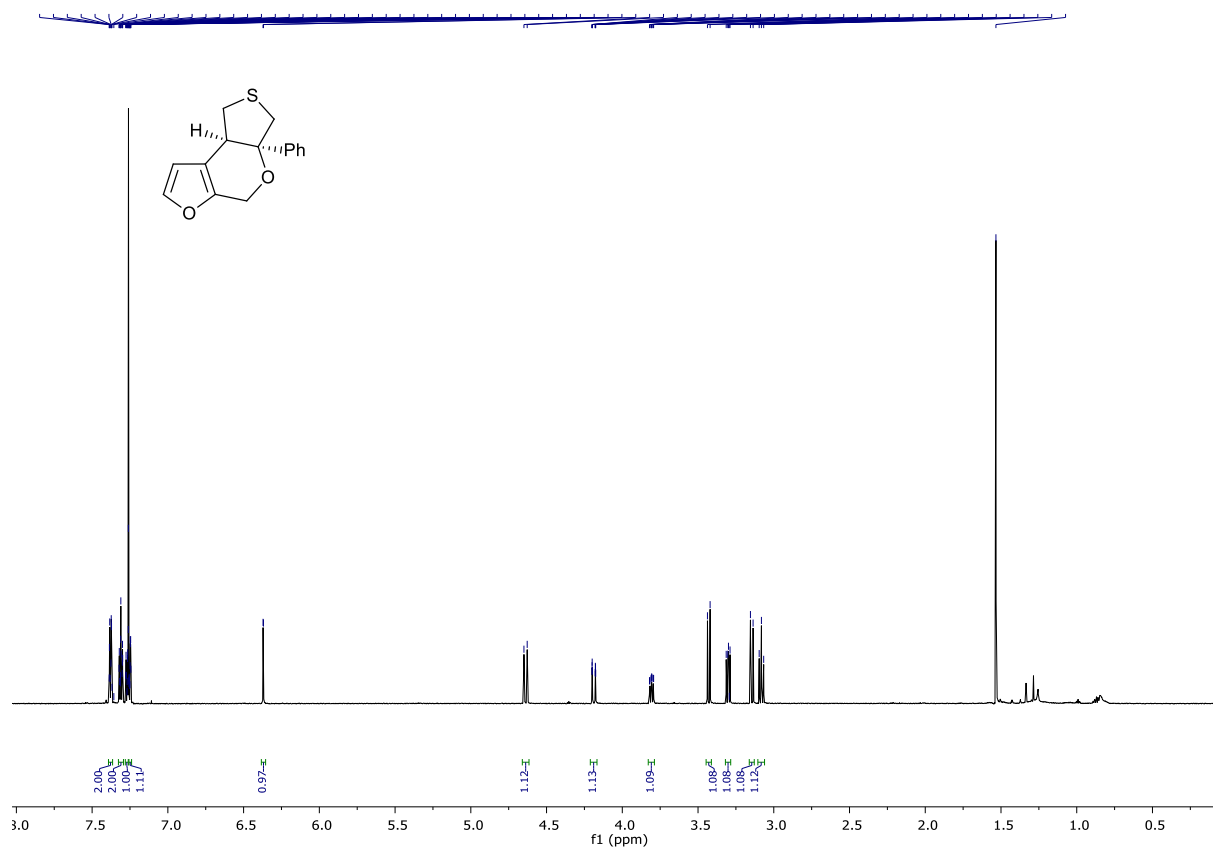

<sup>13</sup>C NMR

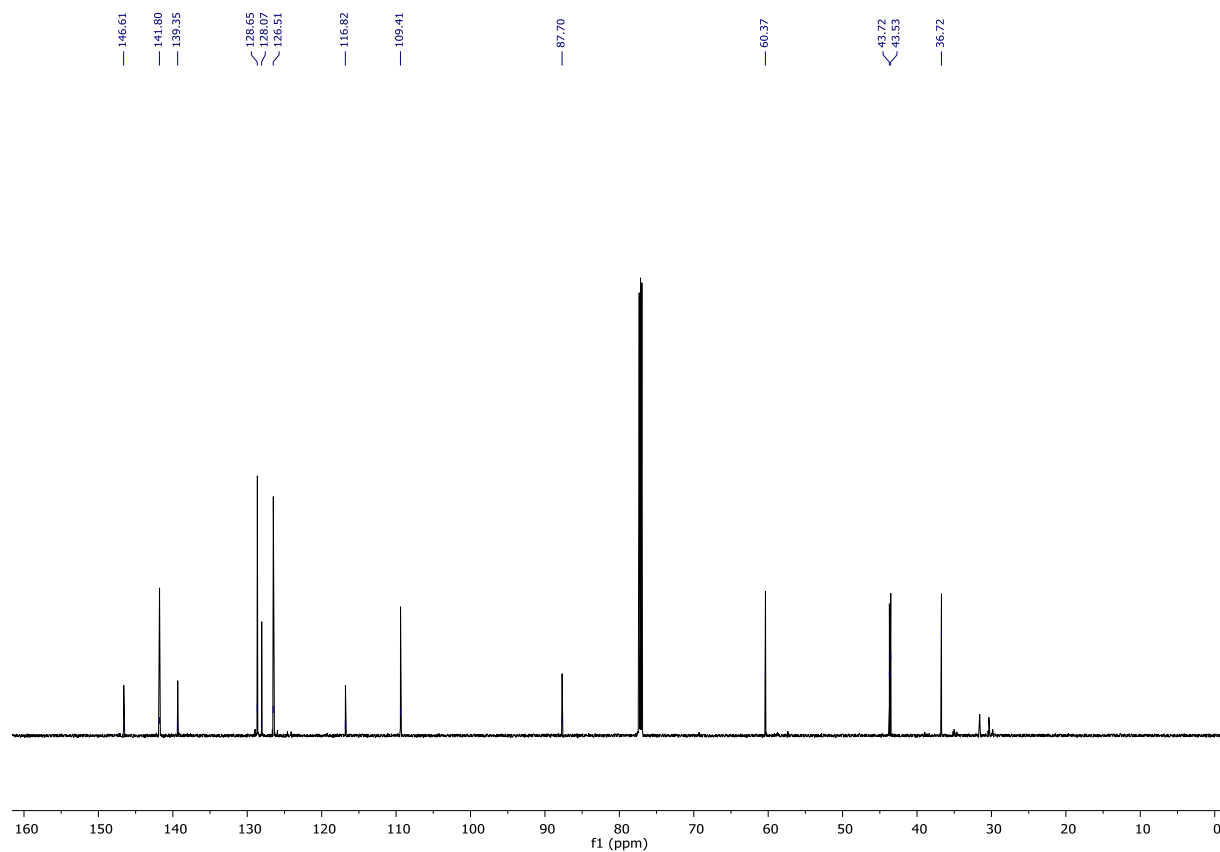



**(3aR,8bR)-3a-(4-Fluorophenyl)-3,3a,5,8b-tetrahydro-1H-furo[3,2-d]thieno[3,4-b]pyran**

**(4b)**

**<sup>1</sup>H NMR**

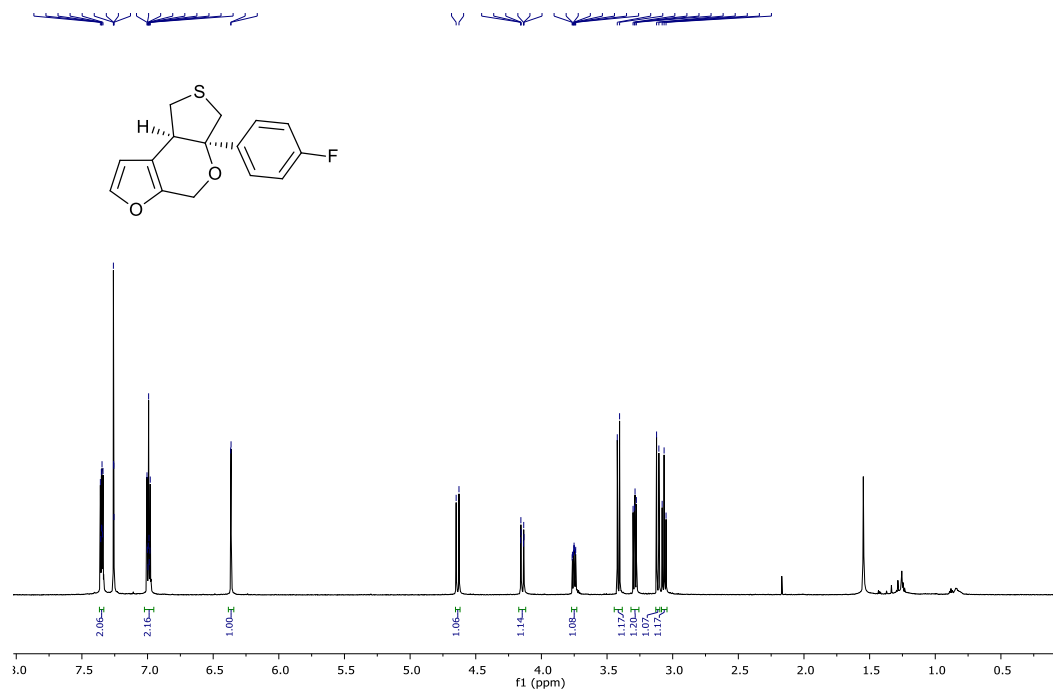

**<sup>13</sup>C NMR**

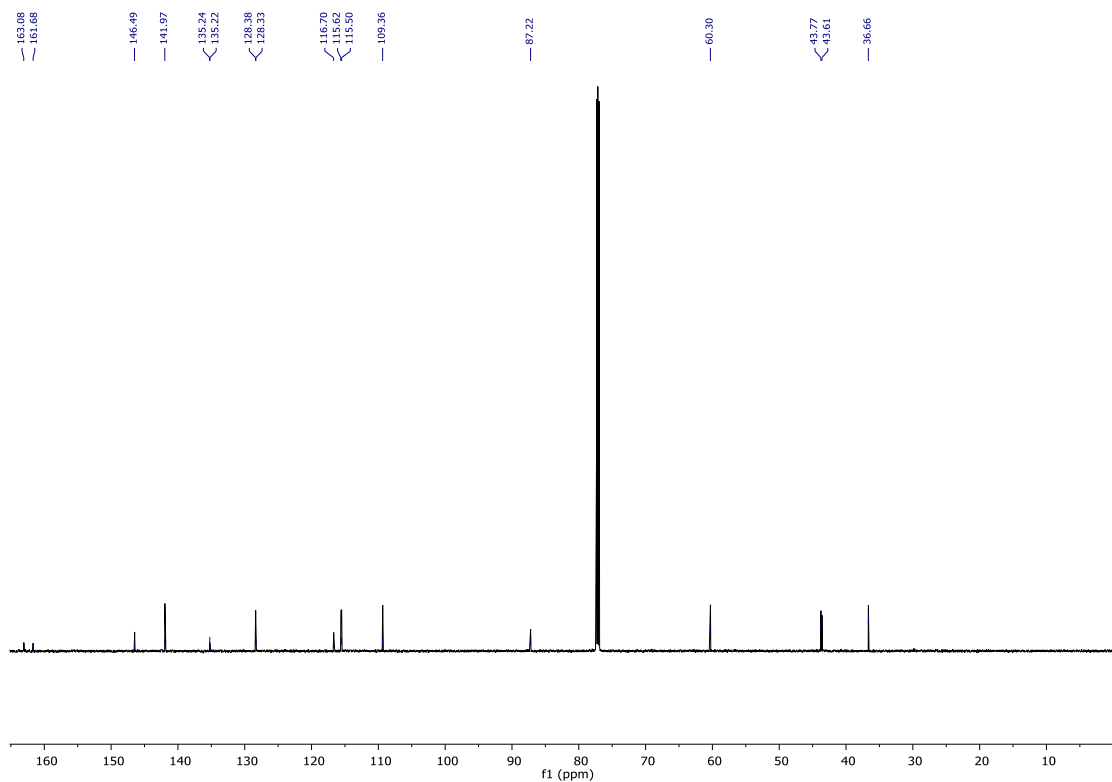

**(3a*R*,8b*R*)-3a-(Thiophen-3-yl)-3,3a,5,8b-tetrahydro-1*H*-furo[3,2-*d*]thieno[3,4-*b*]pyran (4c)**

**<sup>1</sup>H NMR**

7.28  
7.28  
7.27  
7.27  
7.27  
7.27  
7.26  
7.26  
7.11  
7.11  
7.10  
7.10  
7.07  
7.07  
6.36  
6.36

4.64  
4.64  
4.62  
4.62  
4.21  
4.21  
4.21  
4.21  
4.19  
4.19  
4.19  
4.19  
3.67  
3.66  
3.66  
3.65  
3.65  
3.65  
3.64  
3.64  
3.44  
3.44  
3.29  
3.29  
3.28  
3.27  
3.26  
3.26  
3.19  
3.19  
3.02  
3.02  
3.00  
3.00

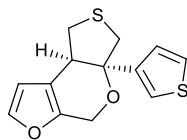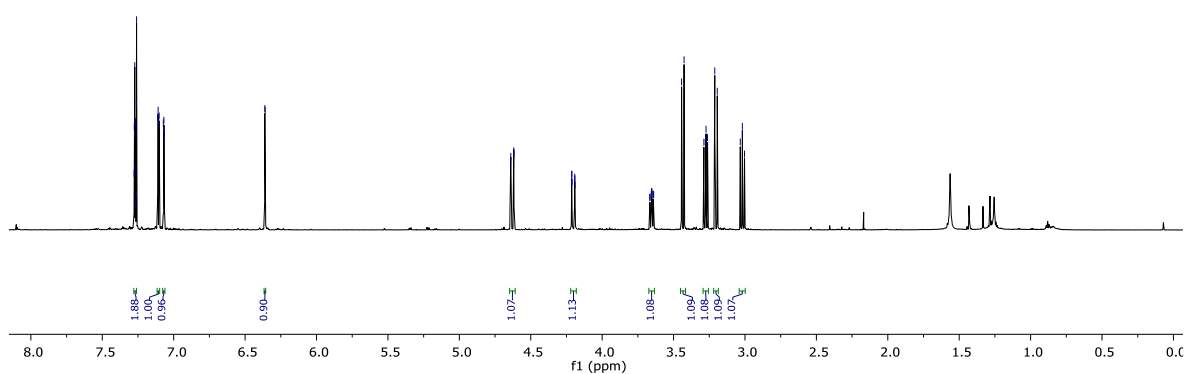

**<sup>13</sup>C NMR**

146.70  
141.86  
141.11  
126.67  
126.10  
122.47  
116.77  
109.42  
85.60  
60.45  
45.34  
43.16  
36.79

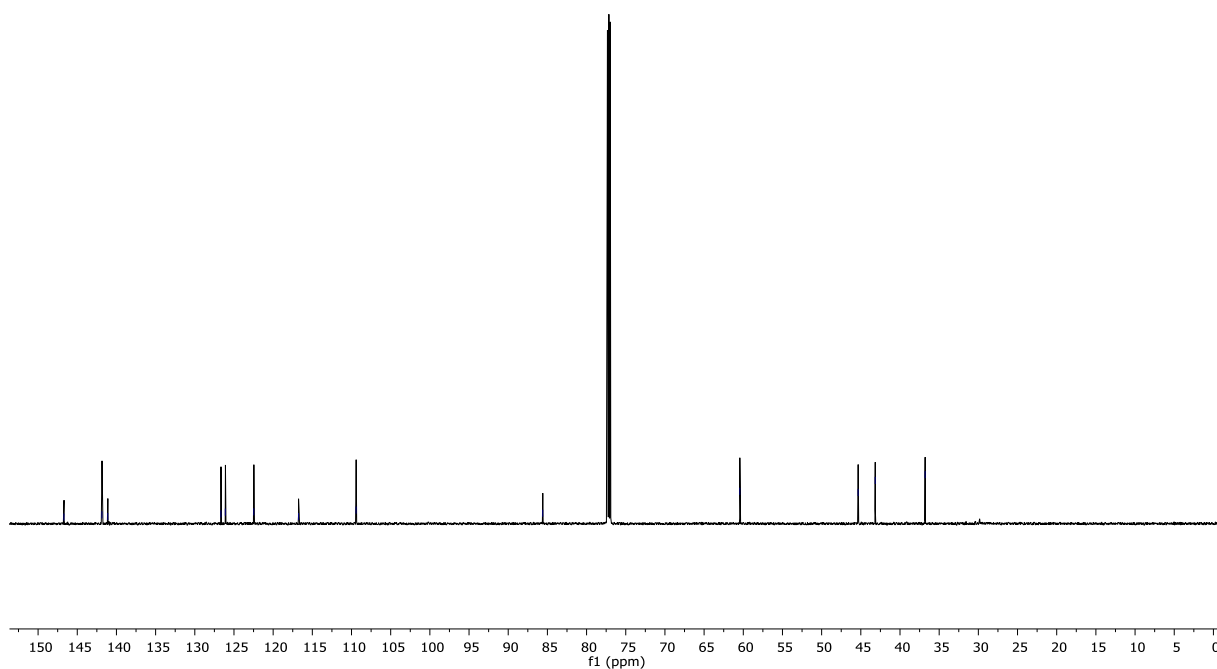

## 7. UPC<sup>2</sup> traces

### (3*R*,4*R*)-4-(2-(Hydroxymethyl)furan-3-yl)-3-phenyltetrahydrothiophen-3-ol (6a)

#### Racemic sample

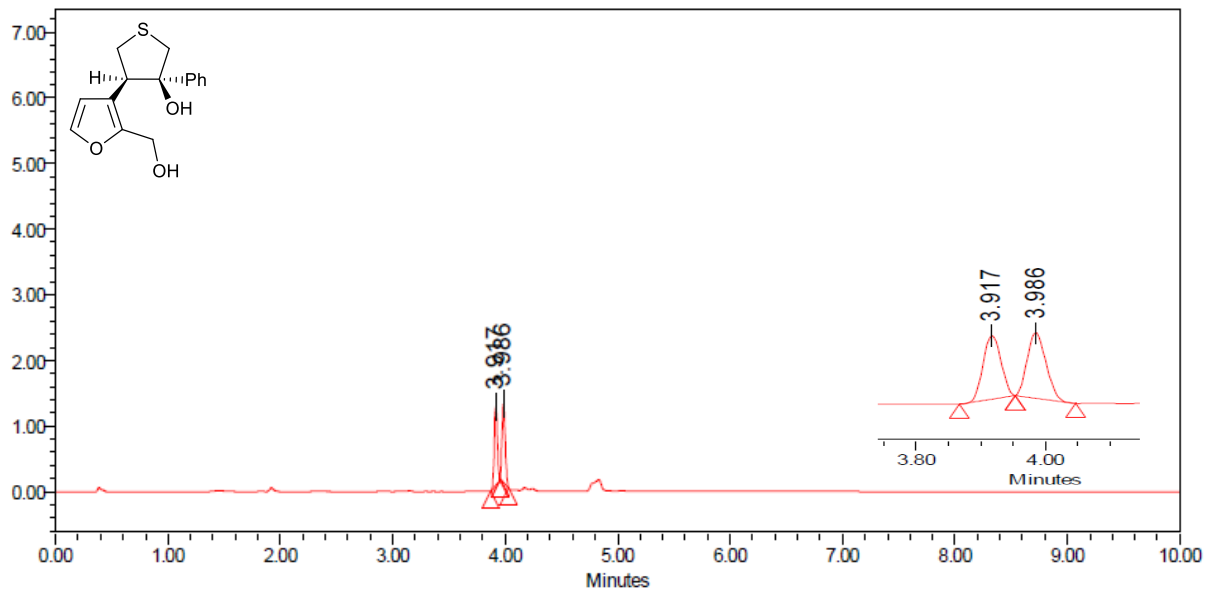

#### Peak Results

|   | RT    | % Area |
|---|-------|--------|
| 1 | 3.917 | 49.03  |
| 2 | 3.986 | 50.97  |

#### Enantiomerically enriched sample

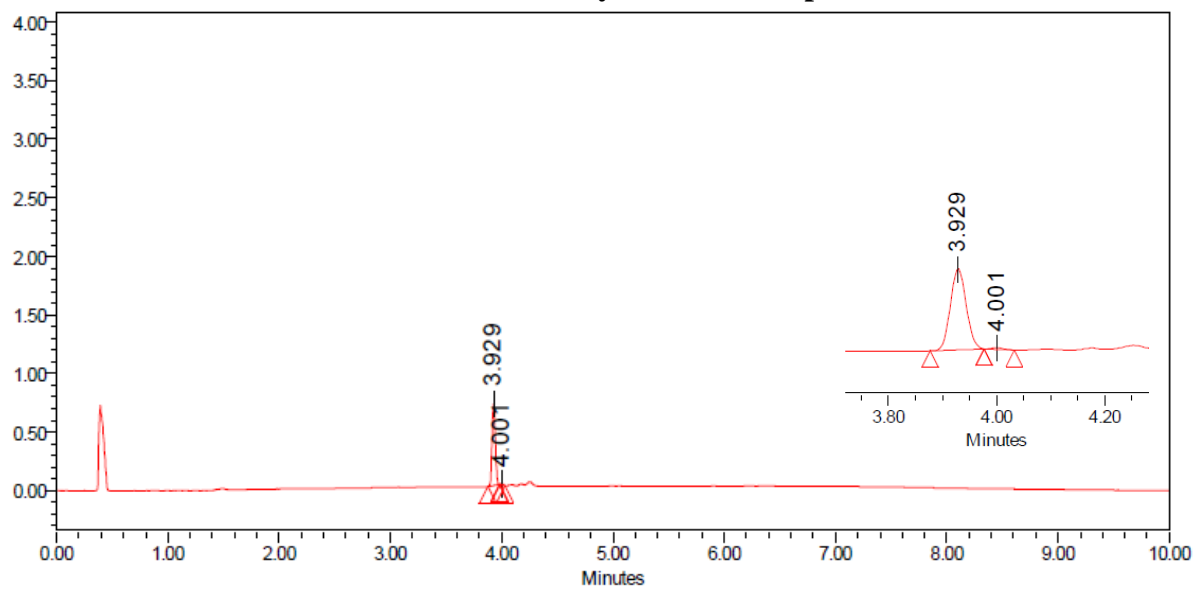

#### Peak Results

|   | RT    | % Area |
|---|-------|--------|
| 1 | 3.929 | 98.86  |
| 2 | 4.001 | 1.14   |

**(3*S*,4*S*)-4-(2-(Hydroxymethyl)furan-3-yl)-3-(2-methoxyphenyl)tetrahydrothiophen-3-ol  
(6b)**

**Racemic sample**

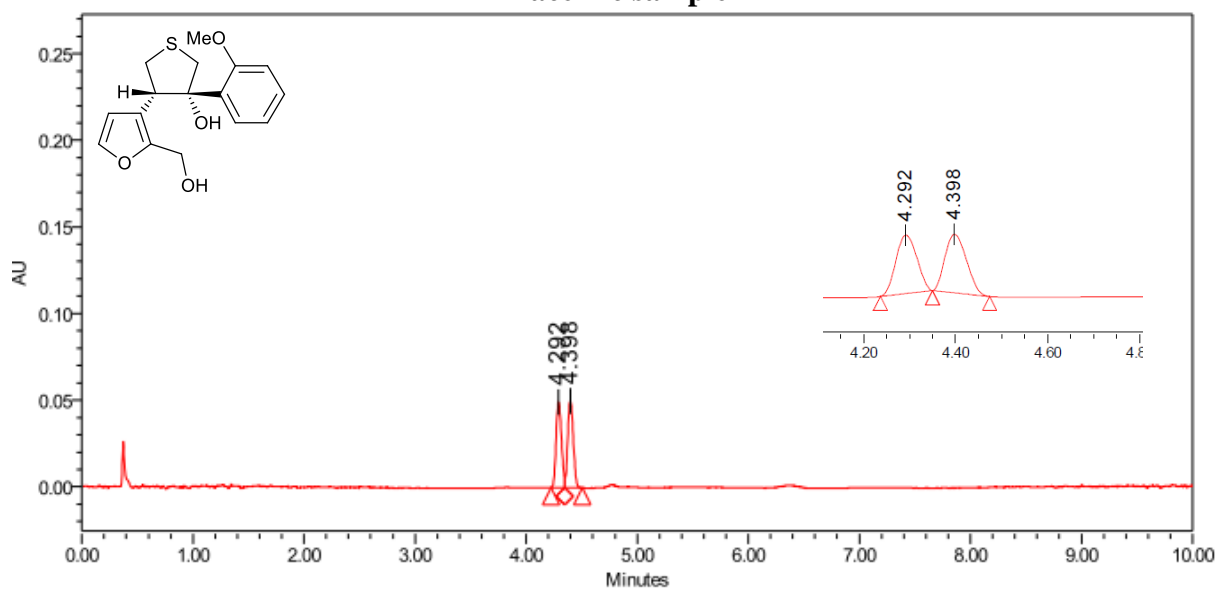

**Peak Results**

|   | RT    | % Area |
|---|-------|--------|
| 1 | 4.292 | 49.28  |
| 2 | 4.398 | 50.72  |

**Enantiomerically enriched sample**

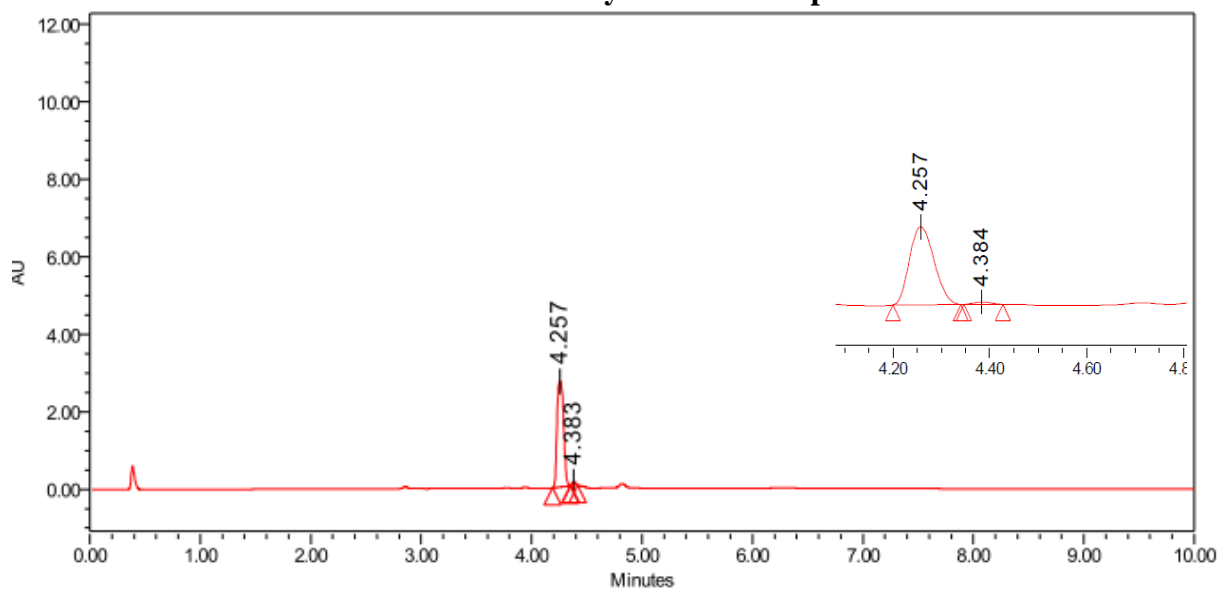

**Peak Results**

|   | RT    | % Area |
|---|-------|--------|
| 1 | 4.257 | 98.22  |
| 2 | 4.383 | 1.78   |

**(3*S*,4*S*)-4-(2-(Hydroxymethyl)furan-3-yl)-3-(3-methoxyphenyl)tetrahydrothiophen-3-ol**  
**(6c)**

**Racemic sample**

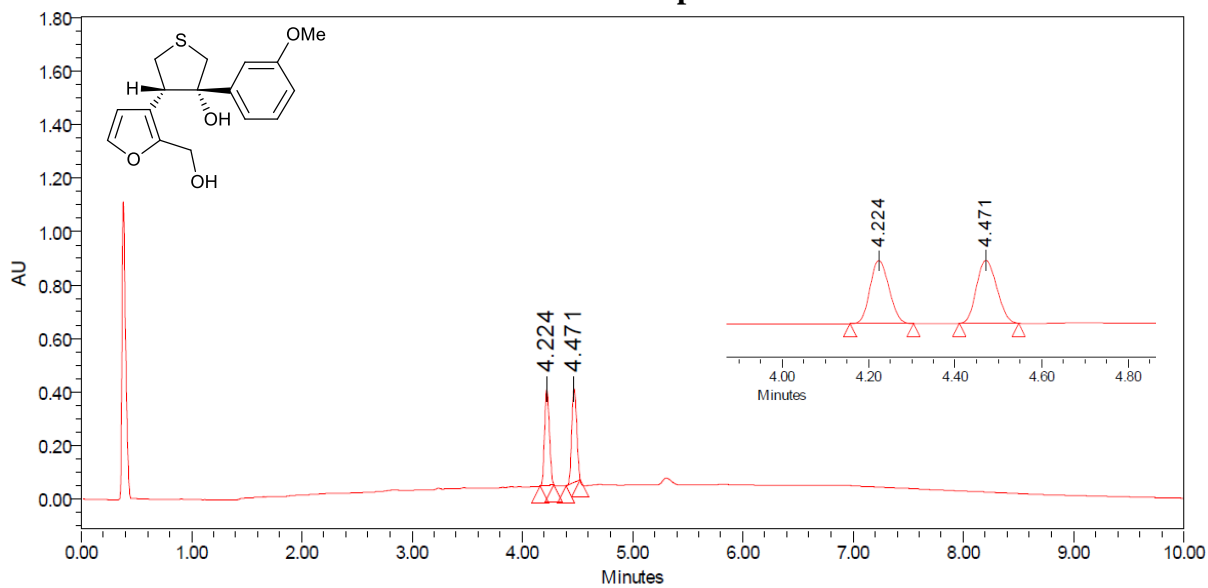

**Peak Results**

|   | RT    | % Area |
|---|-------|--------|
| 1 | 4.224 | 49.79  |
| 2 | 4.471 | 50.21  |

**Enantiomerically enriched sample**

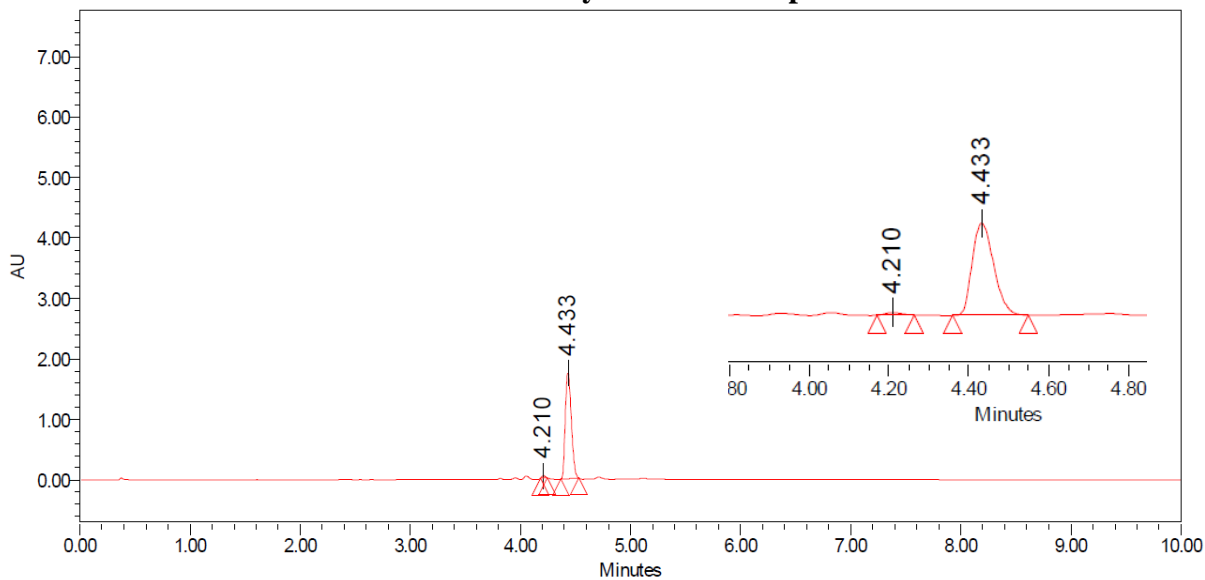

**Peak Results**

|   | RT    | % Area |
|---|-------|--------|
| 1 | 4.210 | 1.20   |
| 2 | 4.433 | 98.80  |

**(3*S*,4*S*)-4-(2-(Hydroxymethyl)furan-3-yl)-3-(4-methoxyphenyl)tetrahydrothiophen-3-ol  
(6d)**

**Racemic sample**

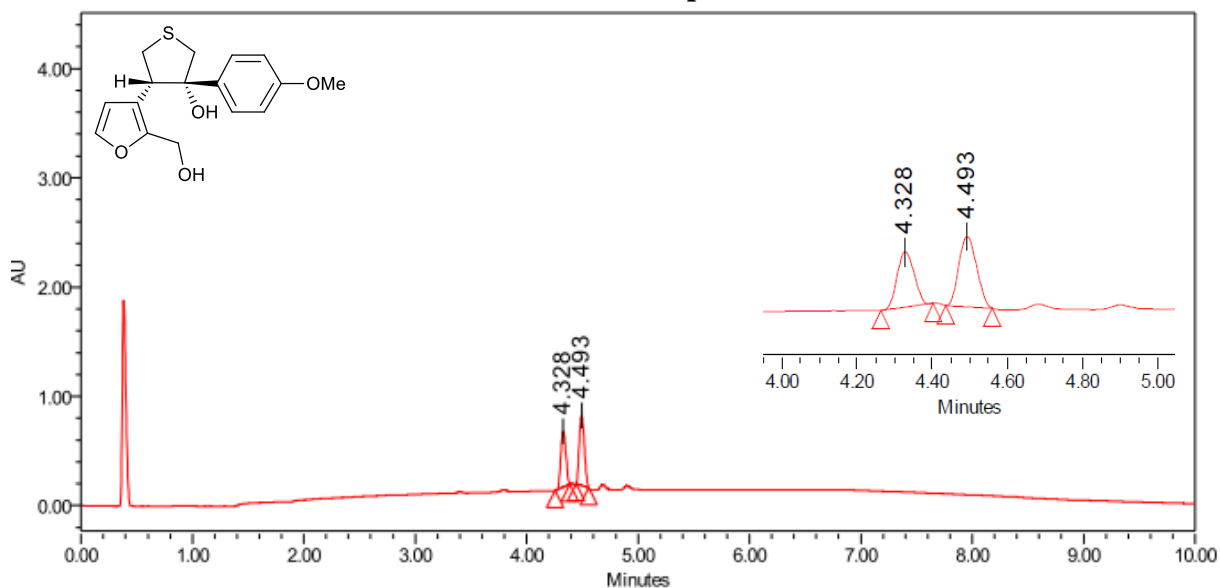

**Peak Results**

|   | RT    | % Area |
|---|-------|--------|
| 1 | 4.328 | 43.99  |
| 2 | 4.493 | 56.01  |

**Enantiomerically enriched sample**

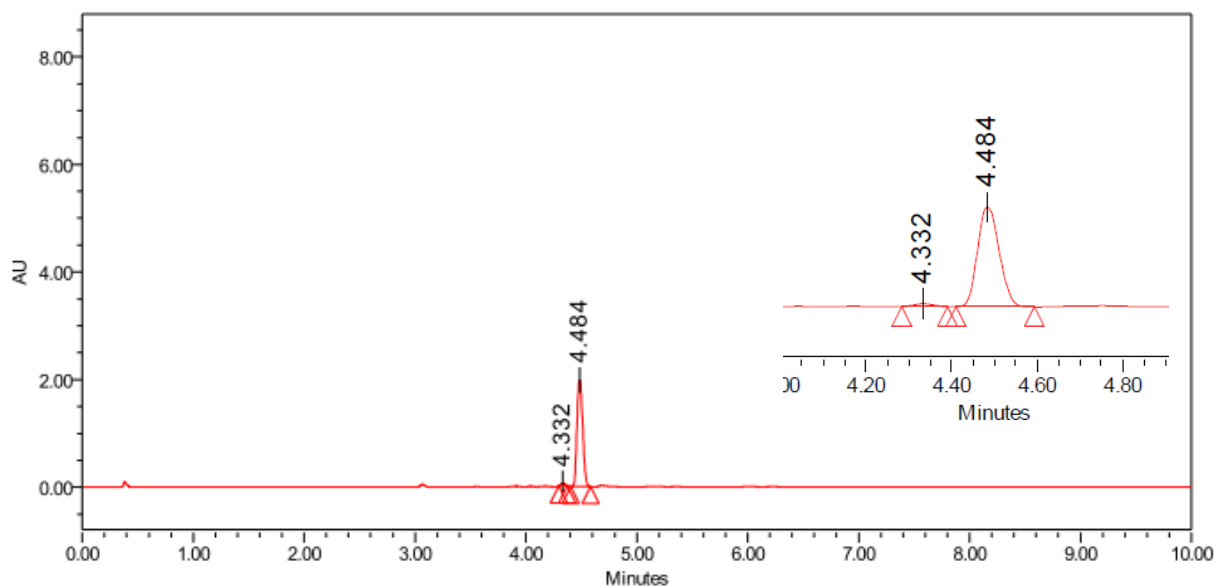

**Peak Results**

|   | RT    | % Area |
|---|-------|--------|
| 1 | 4.332 | 1.86   |
| 2 | 4.484 | 98.14  |

**(3*S*,4*S*)-4-(2-(Hydroxymethyl)furan-3-yl)-3-(*p*-tolyl)tetrahydrothiophen-3-ol (6e)**

**Racemic sample**

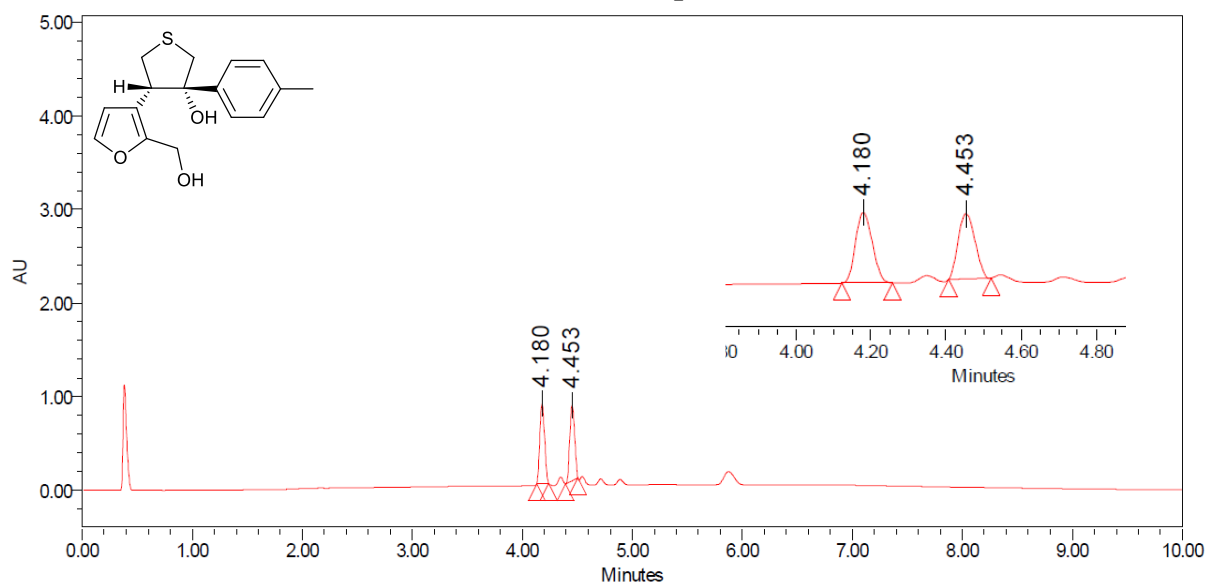

**Peak Results**

|   | RT    | % Area |
|---|-------|--------|
| 1 | 4.180 | 51.02  |
| 2 | 4.453 | 48.98  |

**Enantiomerically enriched sample**

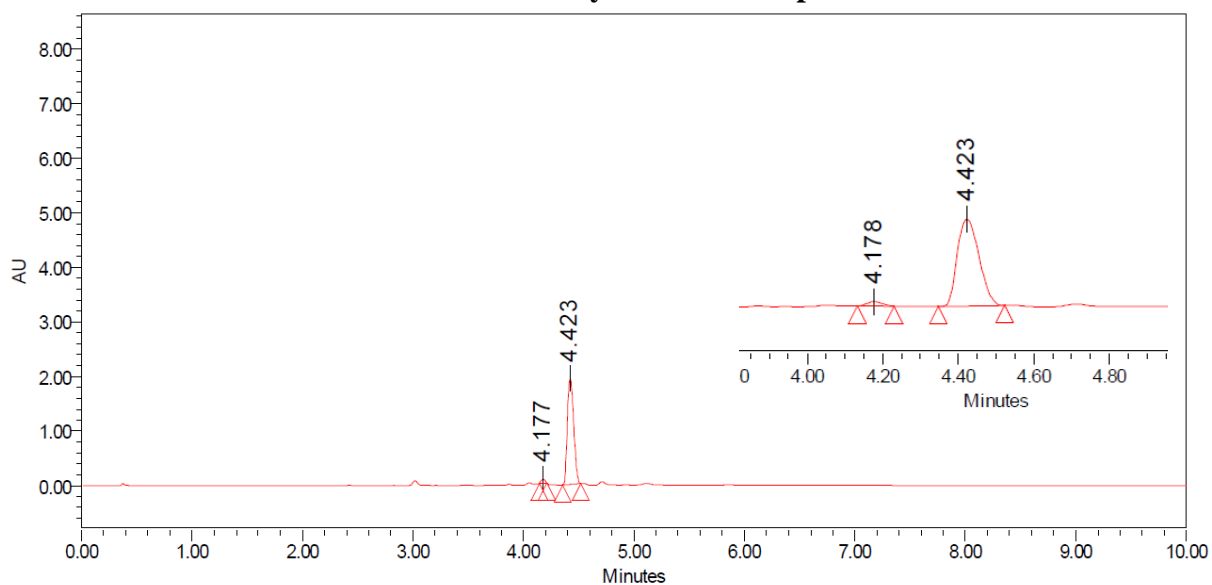

**Peak Results**

|   | RT    | % Area |
|---|-------|--------|
| 1 | 4.177 | 2.16   |
| 2 | 4.423 | 97.84  |

**(3*S*,4*S*)-3-(2-Fluorophenyl)-4-(2-(hydroxymethyl)furan-3-yl)tetrahydrothiophen-3-ol (6f)**

**Racemic sample**

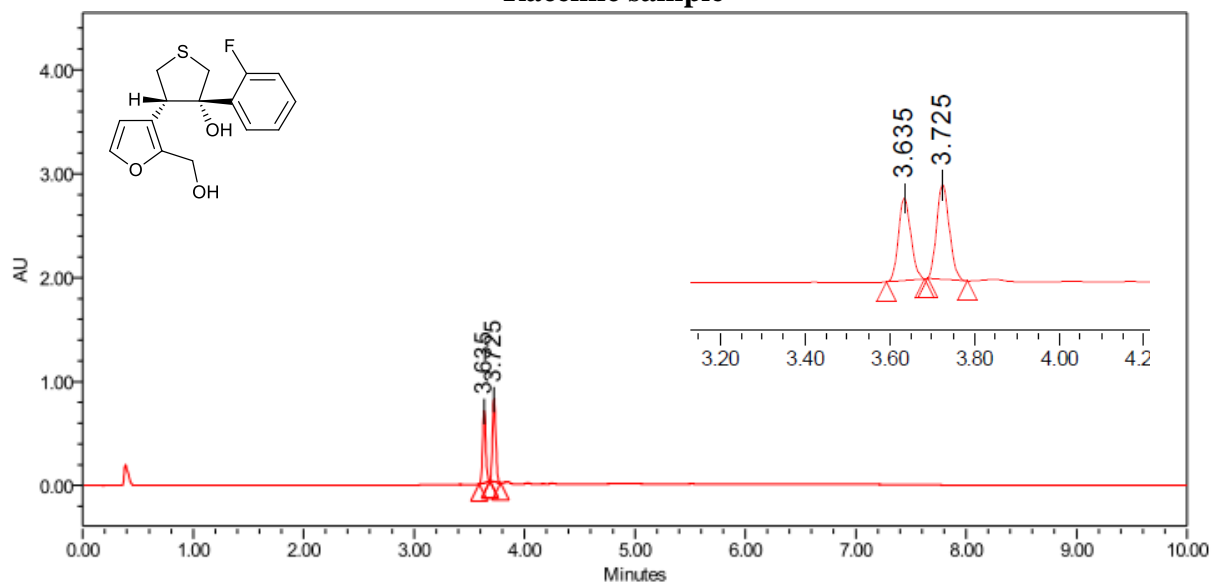

**Peak Results**

|   | RT    | % Area |
|---|-------|--------|
| 1 | 3.635 | 46.07  |
| 2 | 3.725 | 53.93  |

**Enantiomerically enriched sample**

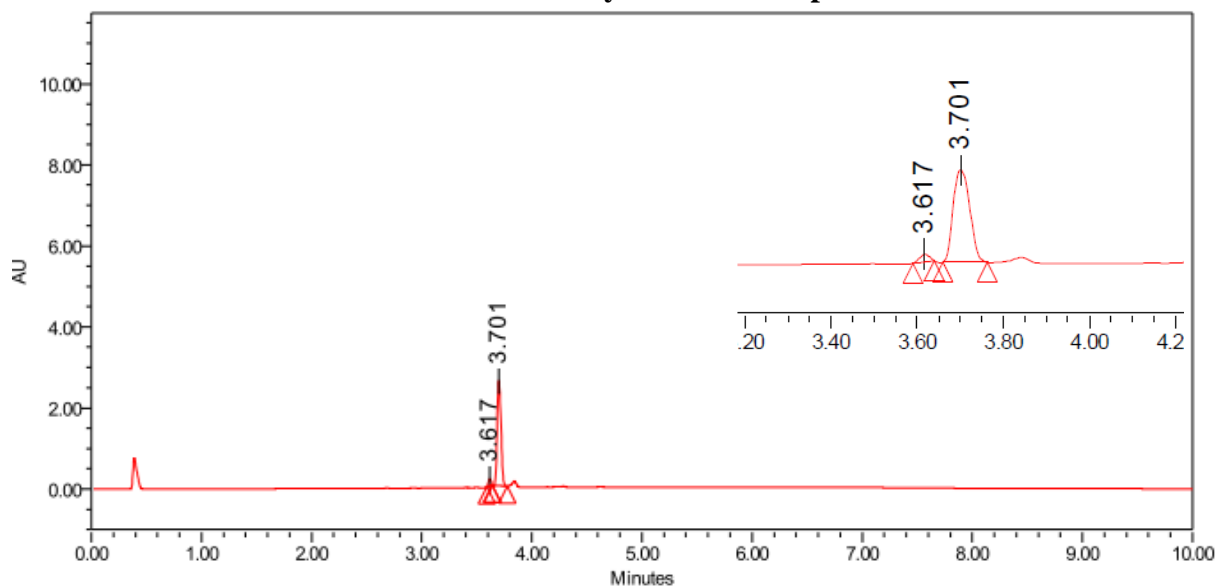

**Peak Results**

|   | RT    | % Area |
|---|-------|--------|
| 1 | 3.617 | 4.09   |
| 2 | 3.701 | 95.91  |



**(3*R*,4*R*)-3-(3-Fluorophenyl)-4-(2-(hydroksymetyl)furan-3-yl)tetrahydro-tiofen-3-ol (6g)**

**Racemic sample**

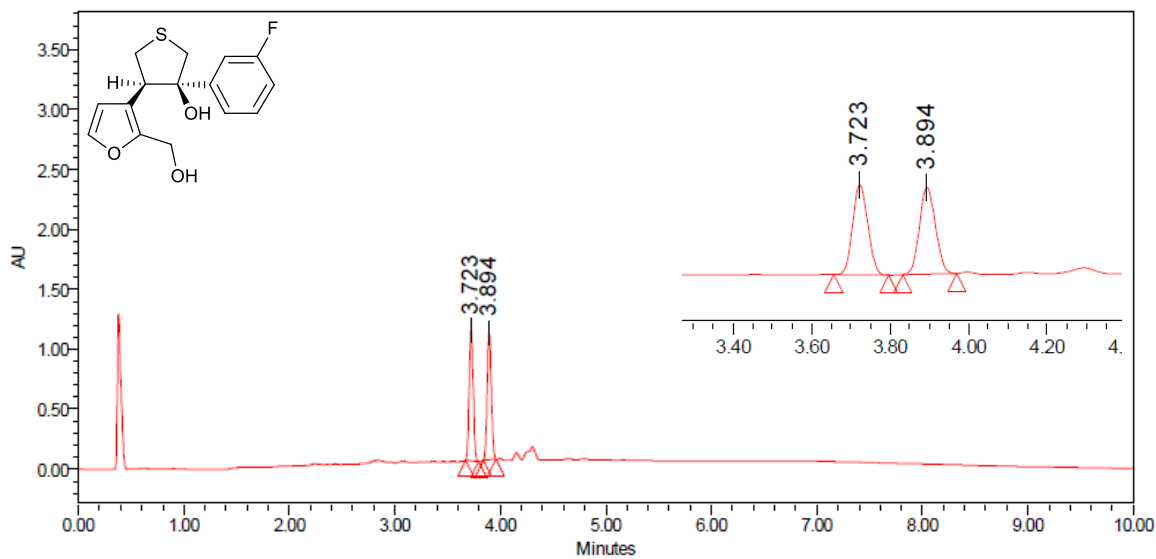

**Peak Results**

|   | RT    | % Area |
|---|-------|--------|
| 1 | 3.723 | 49.48  |
| 2 | 3.894 | 50.52  |

**Enantiomerically enriched sample**

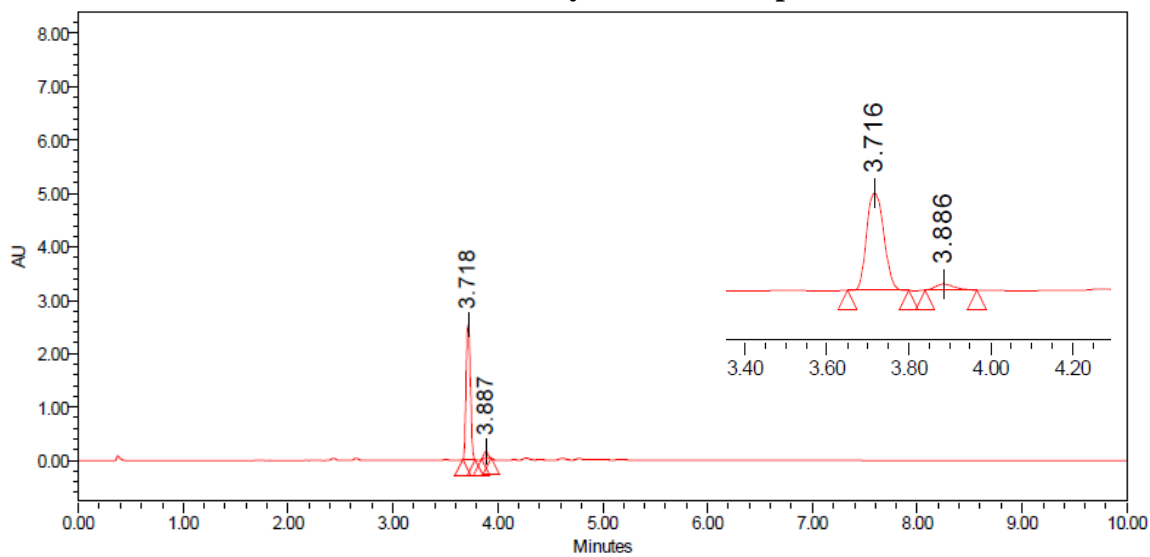

**Peak Results**

|   | RT    | % Area |
|---|-------|--------|
| 1 | 3.718 | 95.12  |
| 2 | 3.887 | 4.88   |

**(3*S*,4*S*)-3-(4-Fluorophenyl)-4-(2-(hydroxymethyl)furan-3-yl)tetrahydrothiophen-3-ol  
(6h)**

**Racemic sample**

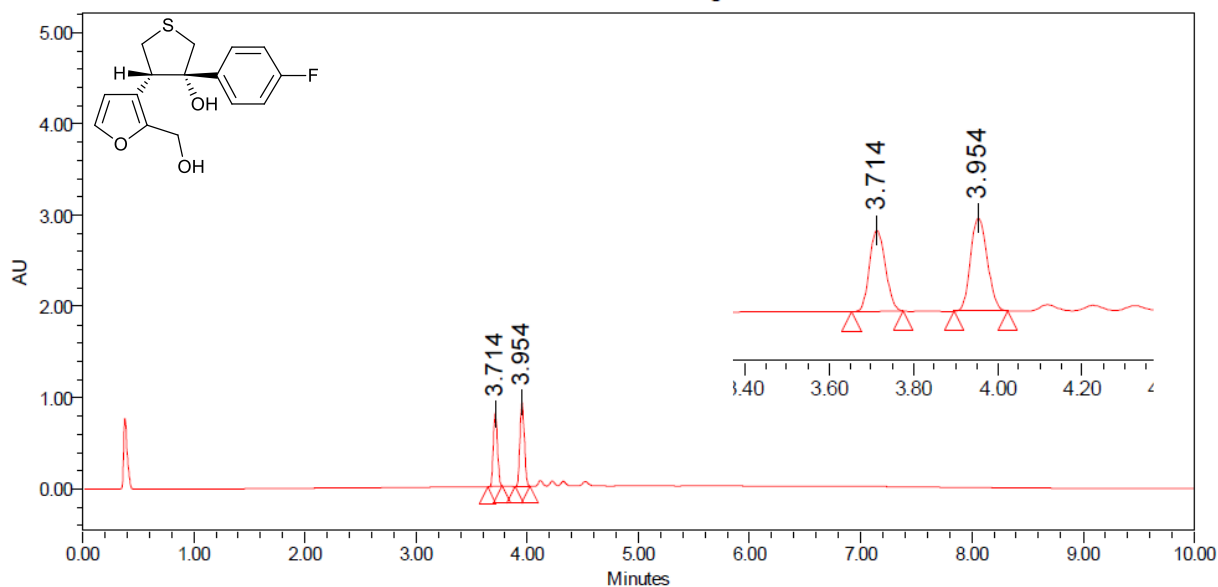

**Peak Results**

|   | RT    | % Area |
|---|-------|--------|
| 1 | 3.714 | 45.01  |
| 2 | 3.954 | 54.99  |

**Enantiomerically enriched sample**

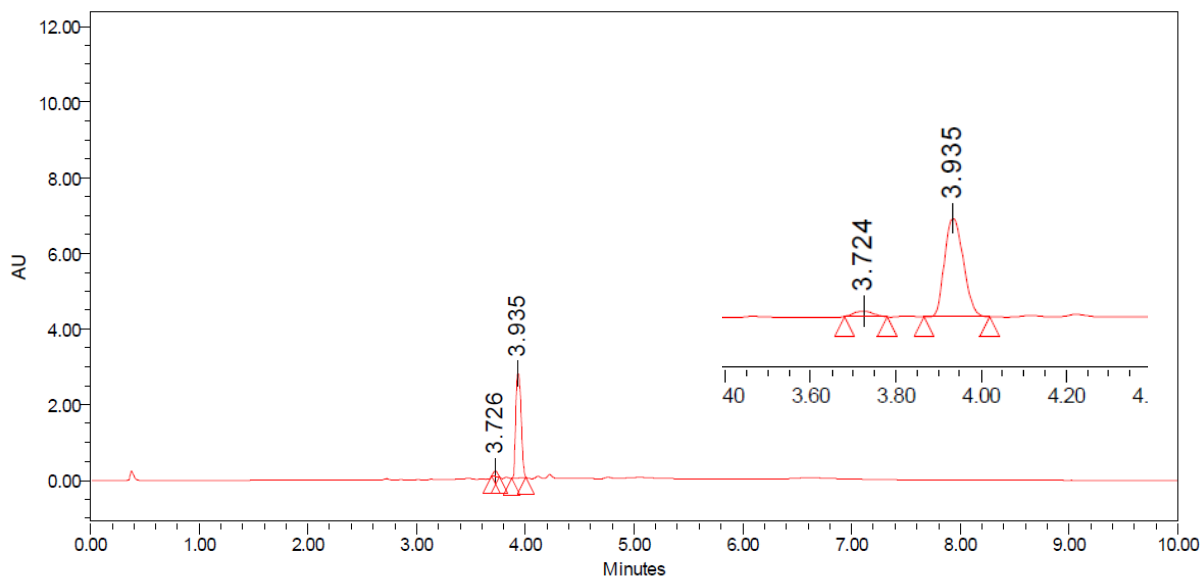

**Peak Results**

|   | RT    | % Area |
|---|-------|--------|
| 1 | 3.726 | 3.89   |
| 2 | 3.935 | 96.11  |

**(3*S*,4*S*)-3-(4-Chlorophenyl)-4-(2-(hydroxymethyl)furan-3-yl)tetrahydrothiophen-3-ol (6i)**

**Racemic sample**

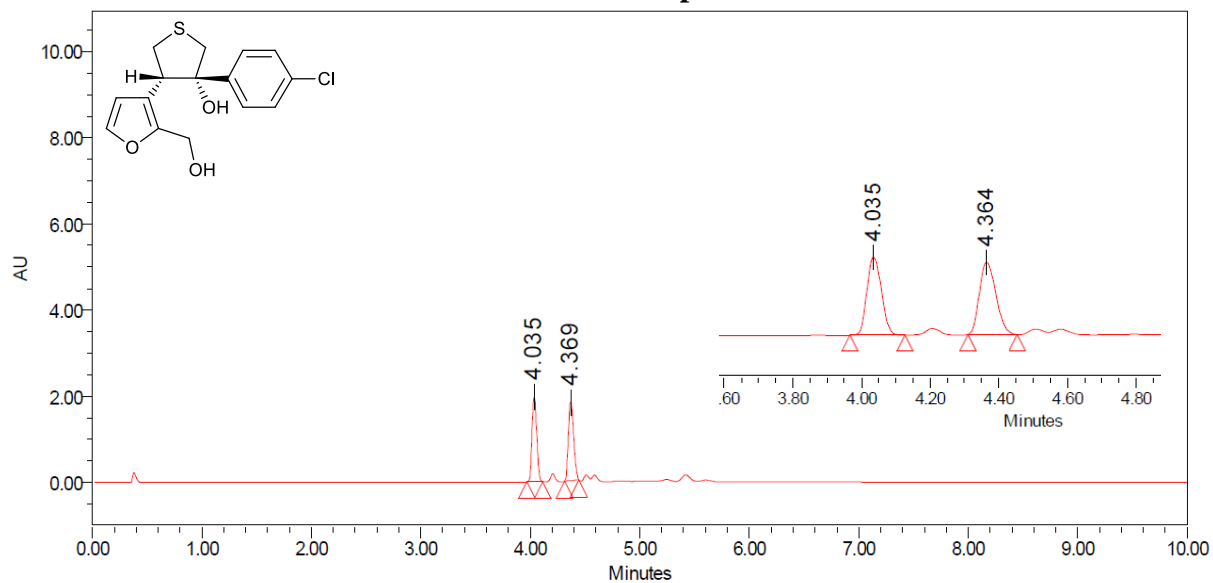

**Peak Results**

|   | RT    | % Area |
|---|-------|--------|
| 1 | 4.035 | 48.82  |
| 2 | 4.369 | 51.18  |

**Enantiomerically enriched sample**

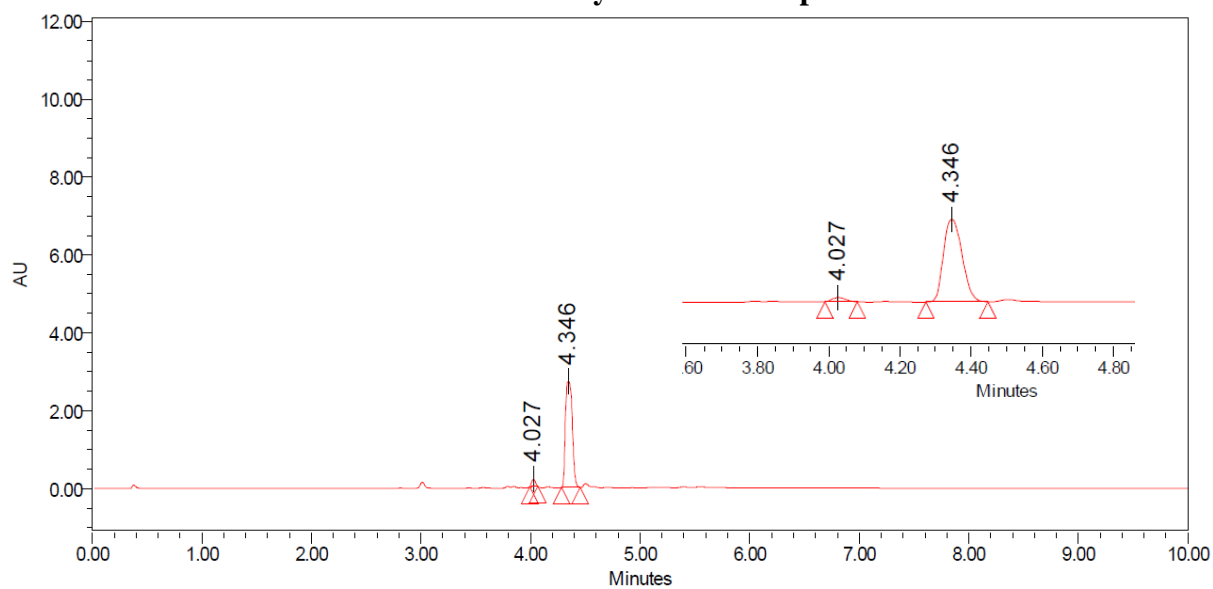

**Peak Results**

|   | RT    | % Area |
|---|-------|--------|
| 1 | 4.027 | 3.60   |
| 2 | 4.346 | 96.40  |

**(3*R*,4*R*)-4-(2-(Hydroxymethyl)furan-3-yl)-3-(4-(trifluoromethyl)phenyl) tetrahydrothiophen-3-ol (6j)**

**Racemic sample**

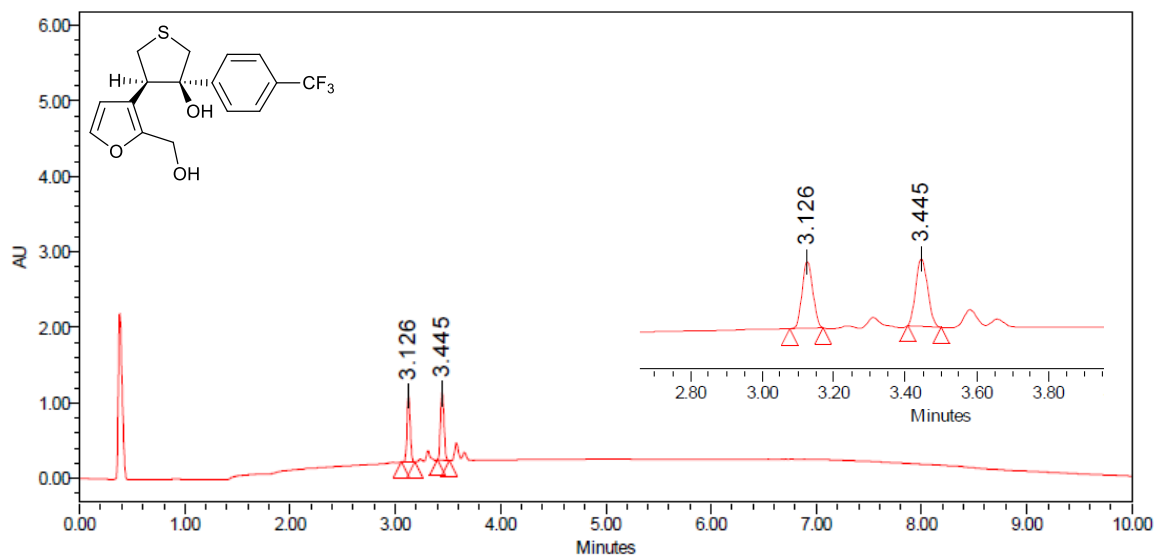

**Peak Results**

|   | RT    | % Area |
|---|-------|--------|
| 1 | 3.126 | 46.92  |
| 2 | 3.445 | 53.08  |

**Enantiomerically enriched sample**

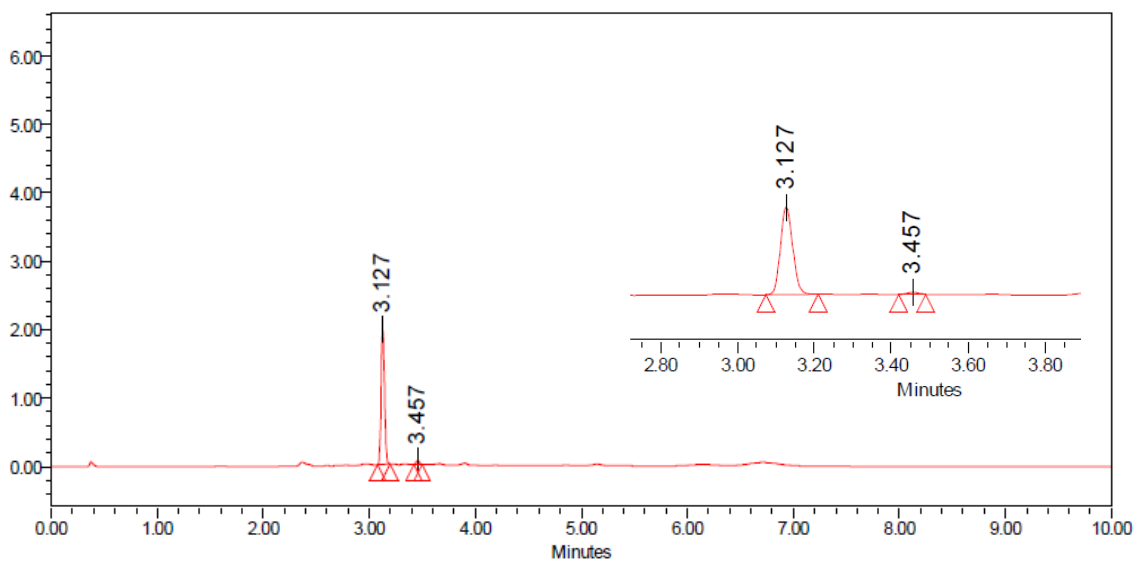

**Peak Results**

|   | RT    | % Area |
|---|-------|--------|
| 1 | 3.127 | 97.46  |
| 2 | 3.457 | 2.54   |

**(3*R*,4*R*)-4-(2-(Hydroxymethyl)furan-3-yl)-3-(naphthalen-2-yl)tetrahydrothiophen-3-ol  
(6k)**

**Racemic sample**

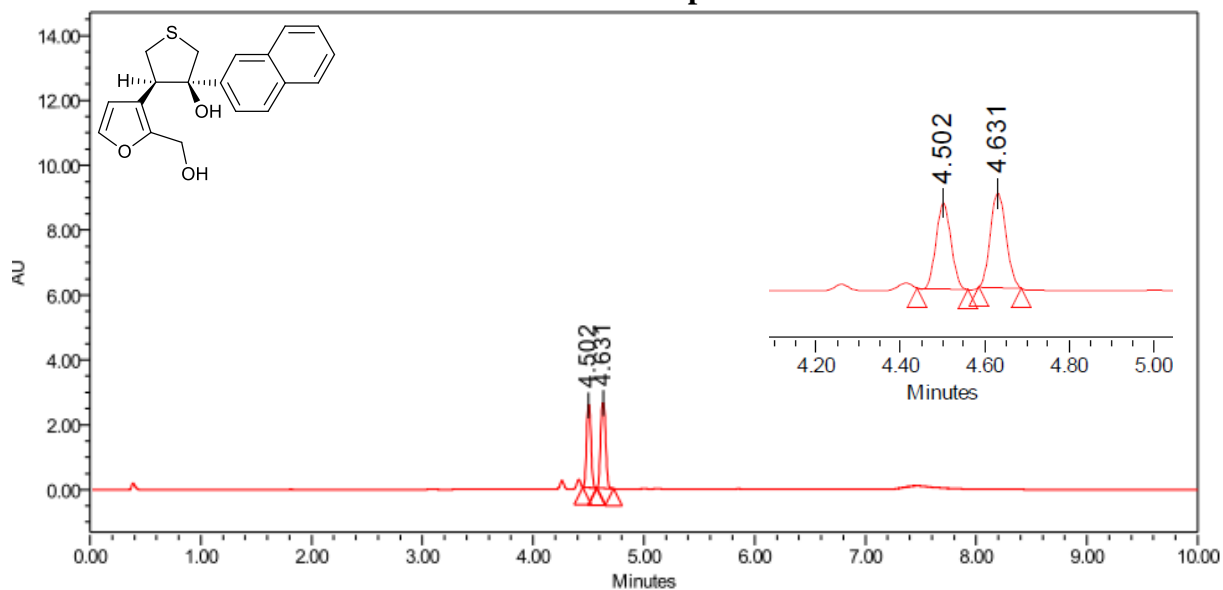

**Peak Results**

|   | RT    | % Area |
|---|-------|--------|
| 1 | 4.502 | 46.28  |
| 2 | 4.631 | 53.72  |

**Enantiomerically enriched sample**

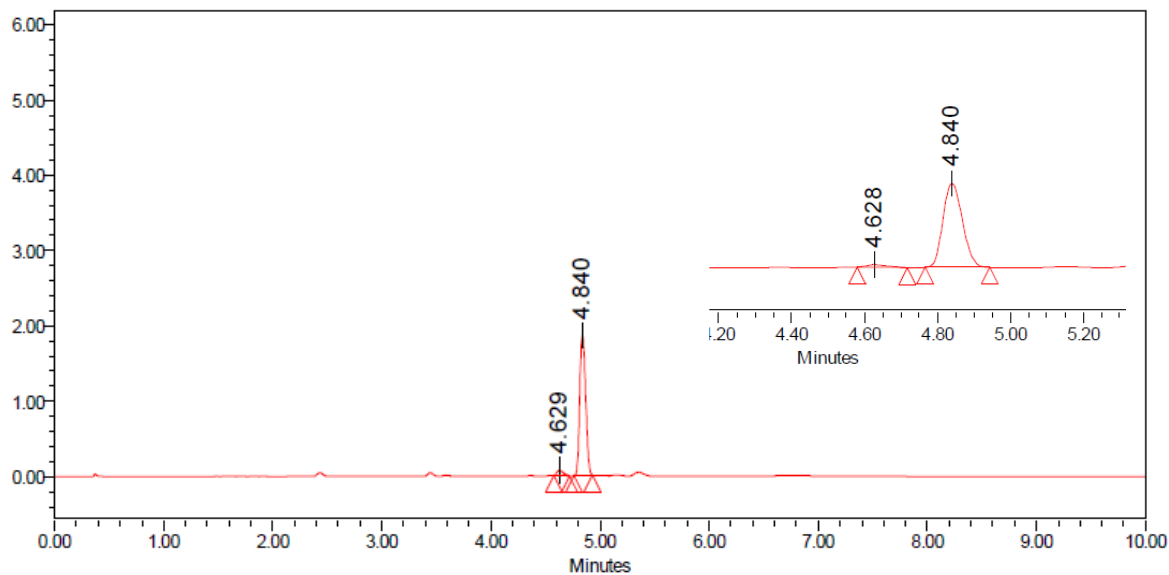

**Peak Results**

|   | RT    | % Area |
|---|-------|--------|
| 1 | 4.629 | 3.86   |
| 2 | 4.840 | 96.14  |

**(3*S*,4*S*)-3-(3,4-Dichlorophenyl)-4-(2-(hydroxymethyl)furan-3-yl)tetrahydrothiophen-3-ol  
(6l)**

**Racemic sample**

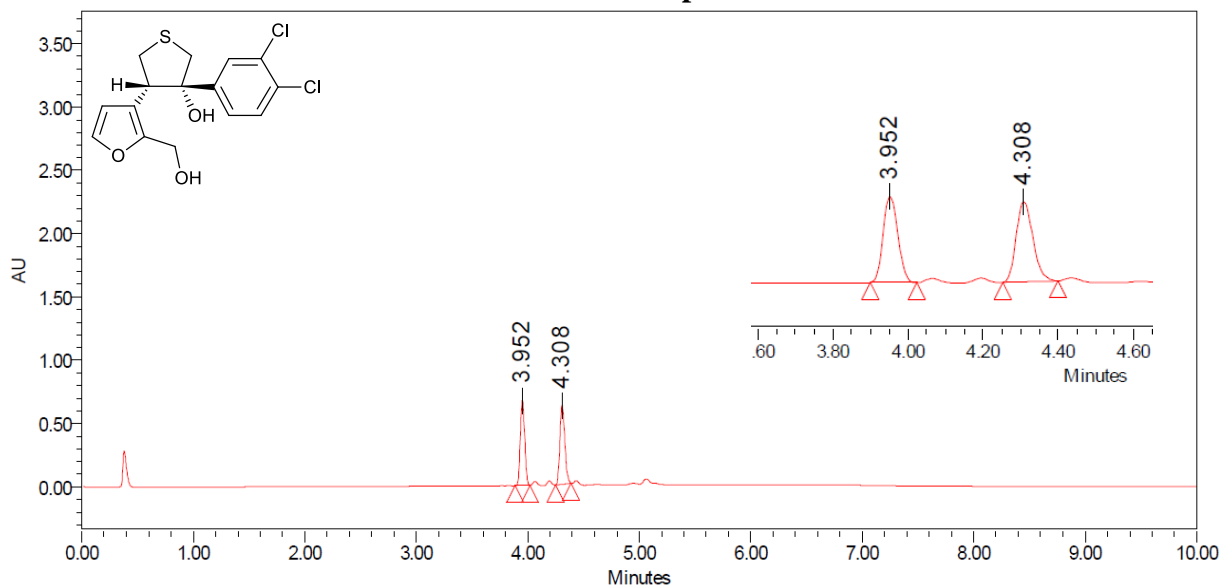

**Peak Results**

|   | RT    | % Area |
|---|-------|--------|
| 1 | 3.952 | 48.94  |
| 2 | 4.308 | 51.06  |

**Enantiomerically enriched sample**

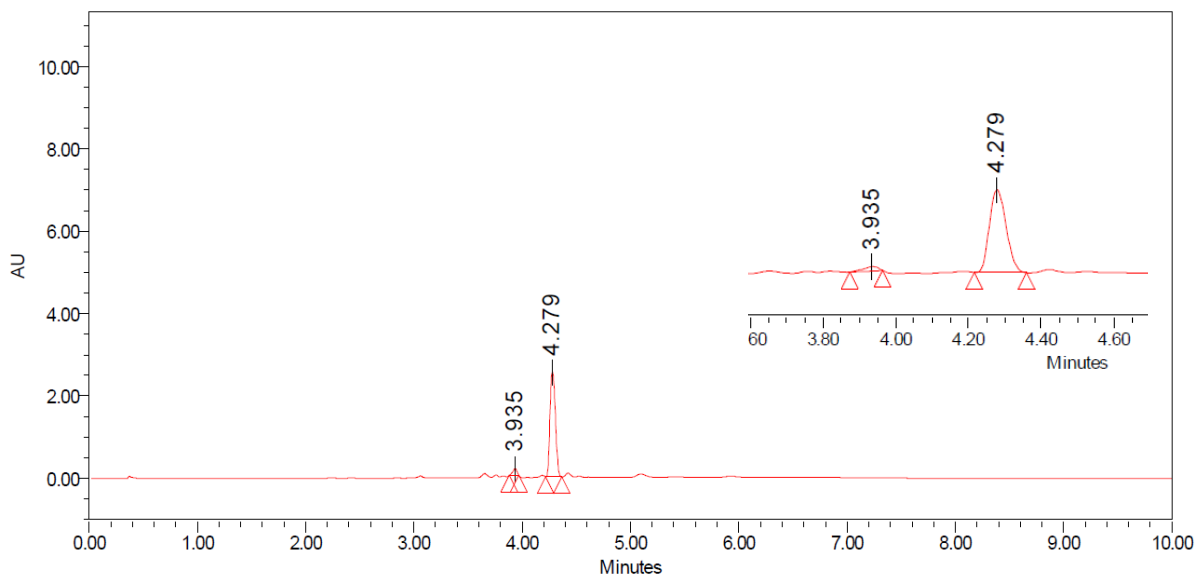

**Peak Results**

|   | RT    | % Area |
|---|-------|--------|
| 1 | 3.935 | 4.22   |
| 2 | 4.279 | 95.78  |

**(3*R*,4*R*)-4-(2-(Hydroxymethyl)furan-3-yl)-3-(thiophen-3-yl)tetrahydrothiophen-3-ol (6m)**

**Racemic sample**

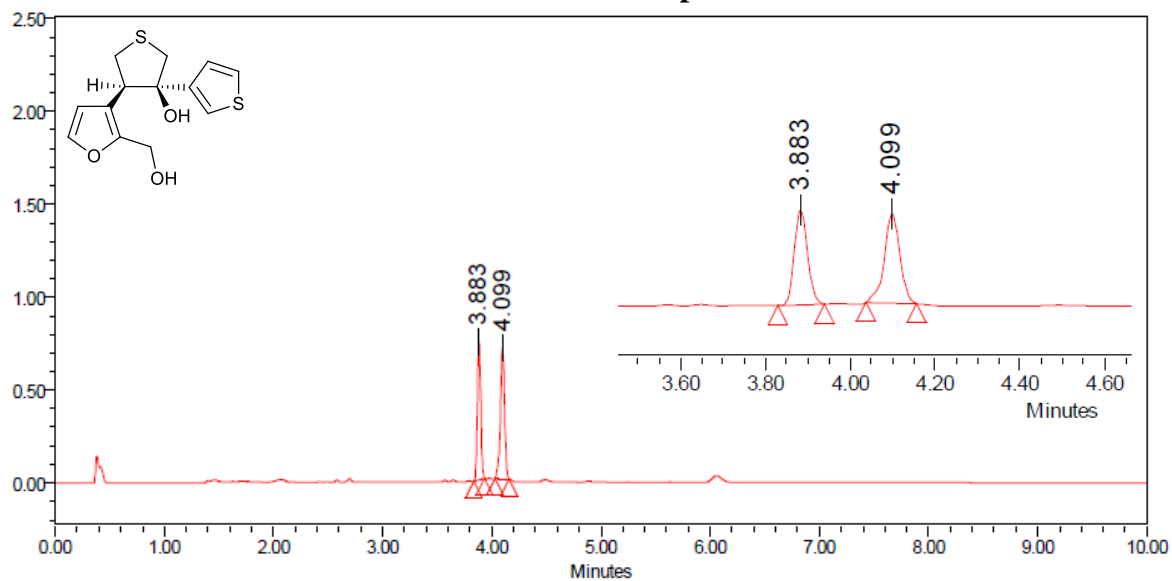

**Peak Results**

|   | Retention Time (min) | % Area |
|---|----------------------|--------|
| 1 | 3.883                | 46.50  |
| 2 | 4.099                | 53.50  |

**Enantiomerically enriched sample**

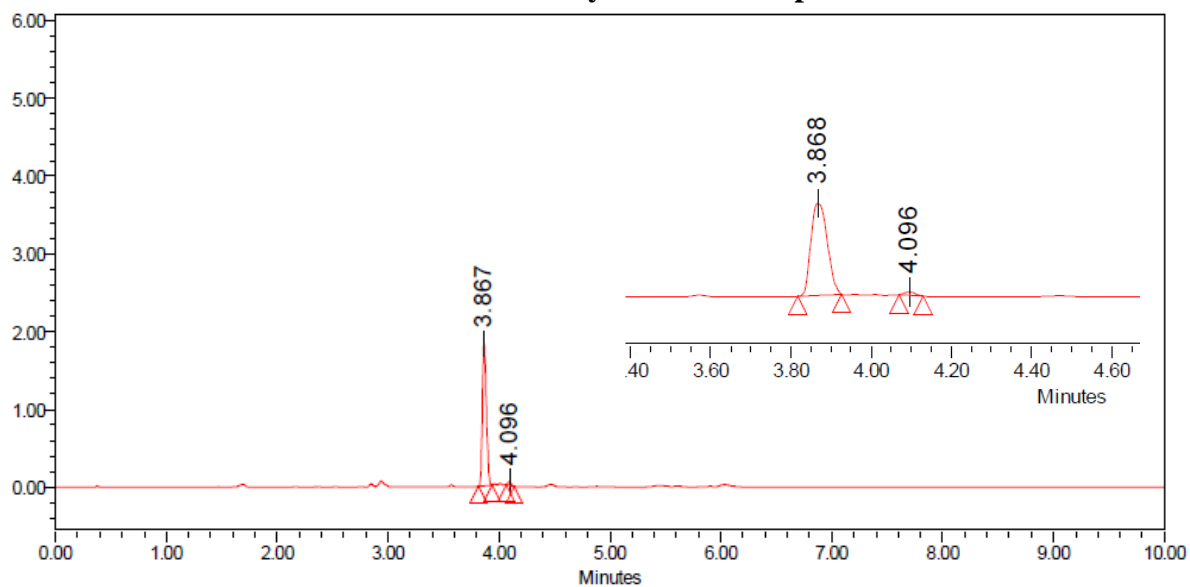

**Peak Results**

|   | RT    | % Area |
|---|-------|--------|
| 1 | 3.867 | 97.98  |
| 2 | 4.096 | 2.02   |

(3*S*,4*S*)-4-(2-(Hydroxymethyl)thiophen-3-yl)-3-phenyltetrahydrothiophen-3-ol (6n)

Racemic sample

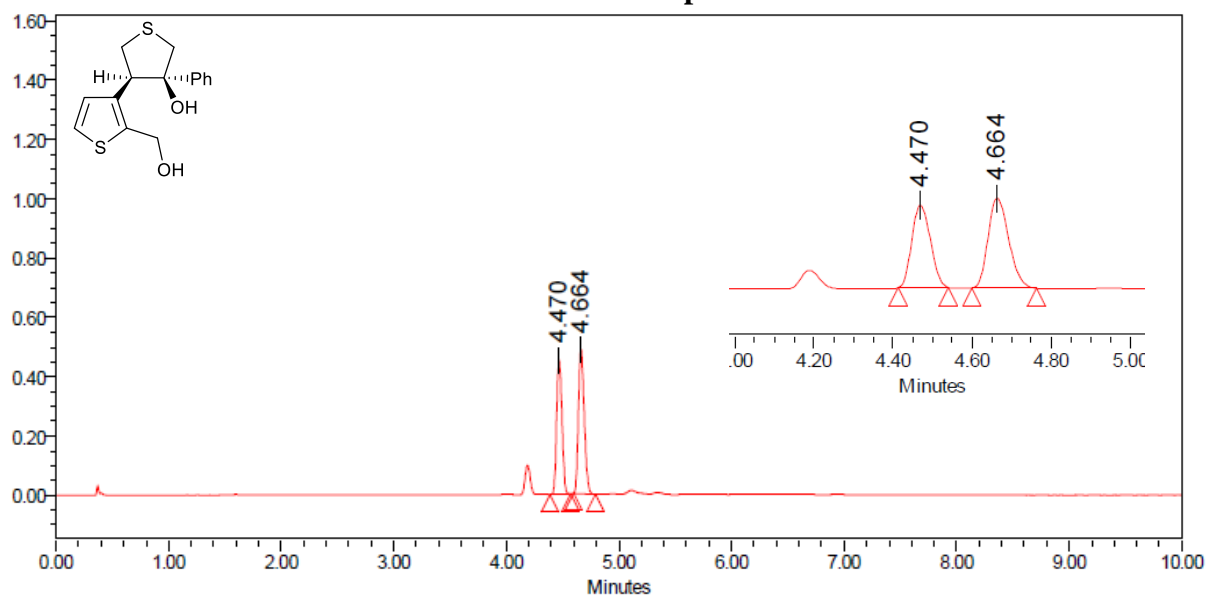

Peak Results

|   | RT    | % Area |
|---|-------|--------|
| 1 | 4.470 | 45.71  |
| 2 | 4.664 | 54.29  |

Enantiomerically enriched sample

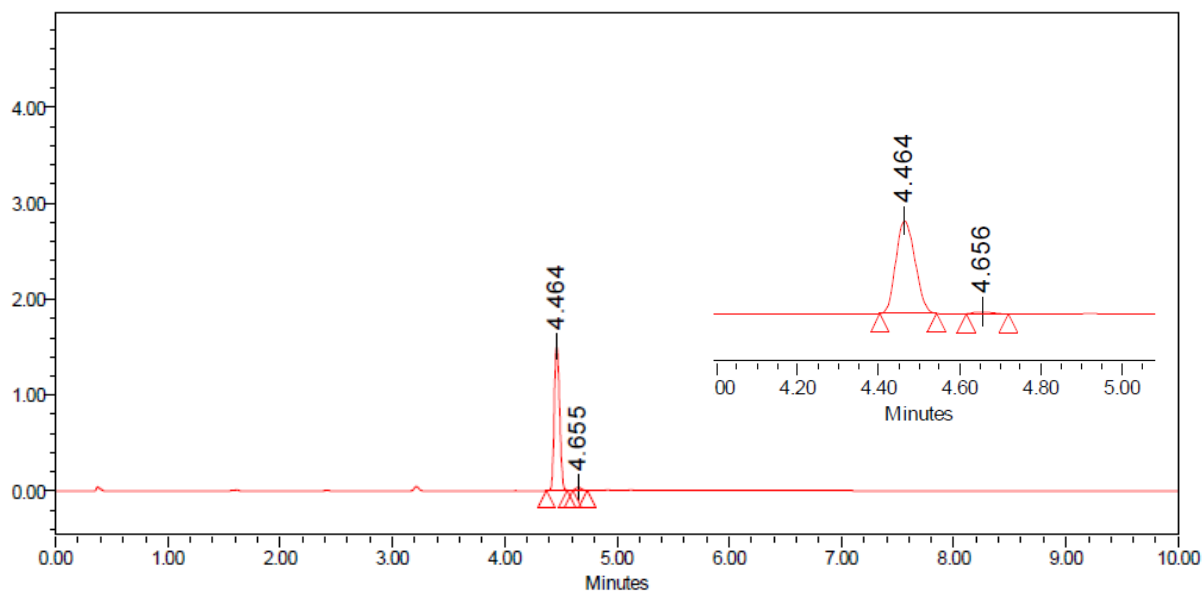

Peak Results

|   | RT    | % Area |
|---|-------|--------|
| 1 | 4.464 | 97.86  |
| 2 | 4.655 | 2.14   |



**(3*R*,4*R*)-4-(2-(Hydroxymethyl)benzofuran-3-yl)-3-phenyltetrahydrothiophen-3-ol (6o)**

**Racemic sample**

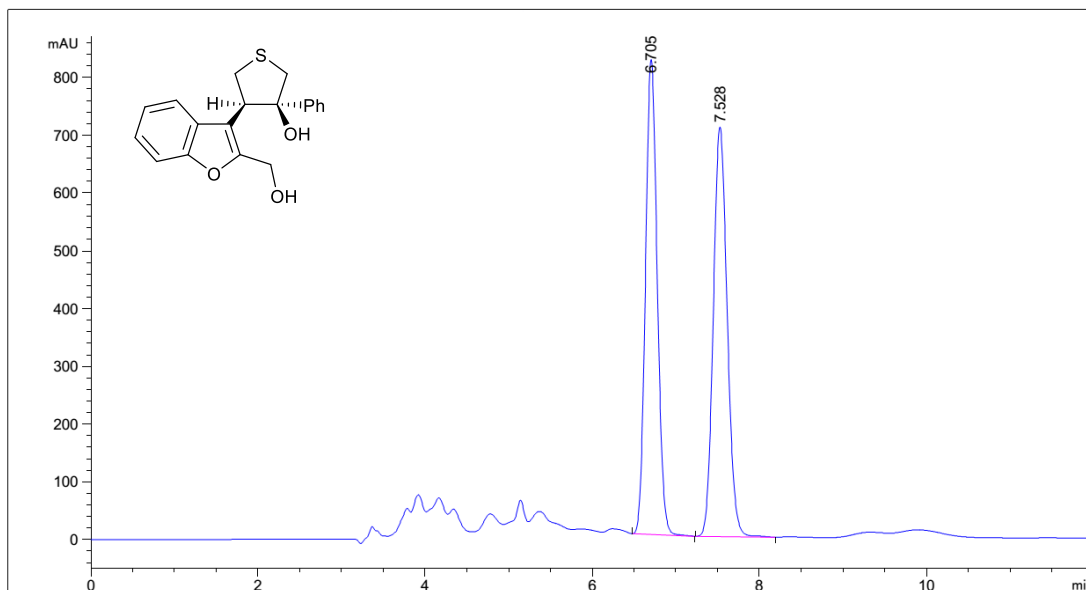

| Peak No. | Ret Time | Width  | Area       | Height    | Area [%] |
|----------|----------|--------|------------|-----------|----------|
| #        | [min]    | [min]  | [mAU*s]    | [mAU]     | %        |
| 1        | 6.705 BB | 0.1511 | 7984.79883 | 822.44684 | 49.3921  |
| 2        | 7.528 BB | 0.1797 | 8181.34375 | 709.24634 | 50.6079  |

**Enantiomerically enriched sample**

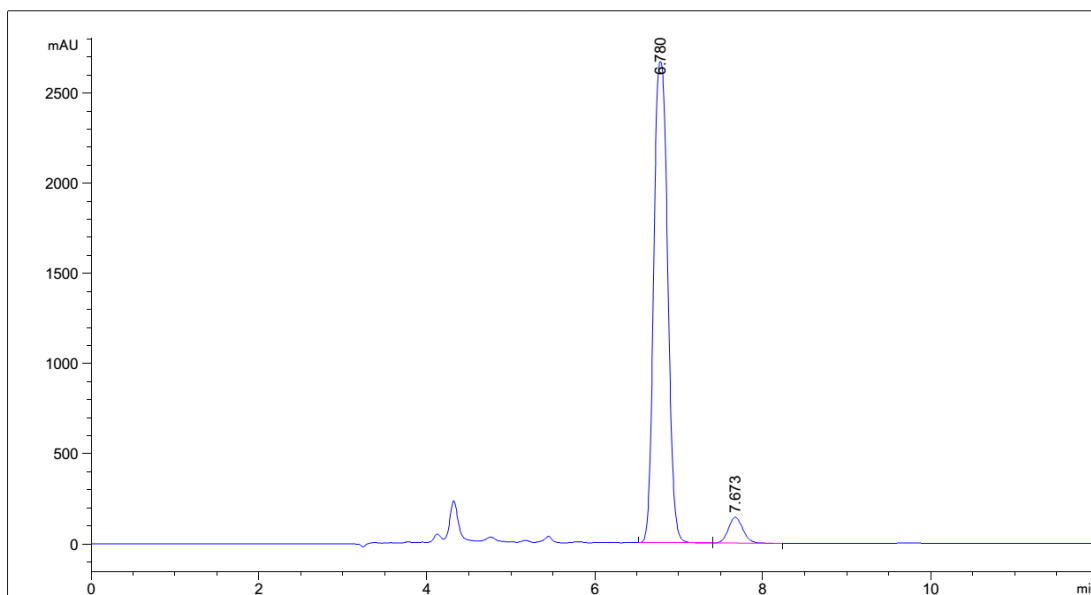

| Peak No. | Ret Time  | Width  | Area       | Height     | Area [%] |
|----------|-----------|--------|------------|------------|----------|
| #        | [min]     | [min]  | [mAU*s]    | [mAU]      | %        |
| 1        | 6.780 VV  | 0.1831 | 3.05694e4  | 2668.82910 | 94.6400  |
| 2        | 7.673 VBA | 0.1857 | 1731.31812 | 143.67699  | 5.3600   |
